# Supplementary material for: A modular and divergent approach for the total synthesis of Elaeocarpus alkaloids
Source: Royal Society of Chemistry journal article supplement (doi:10.1039/d2qo01460b), 2022-11-08

## Supporting Information

# **A Modular and Divergent Approach for the Total Synthesis of Elaeocarpus Alkaloids**

Guang Tian,<sup>a,b</sup> Yi-Chi Zhang,<sup>b</sup> Chuanguang Qin<sup>\*a</sup> and Jie Wang<sup>\*b,c</sup>

<sup>a</sup>Department of Chemistry, Shanxi Key Laboratory of Polymer Science & Technology, MOE Key Laboratory of Supramolecular Material Physics & Chemistry, School of Chemical & Chemical Engineering, Northwestern Polytechnical University, Xi'an 710129, China.

<sup>b</sup>Department of Medicinal Chemistry, Shanghai Institute of Materia Medica, Chinese Academy of Sciences, Shanghai 201203, China.

<sup>c</sup>University of Chinese Academy of Sciences, Beijing 100049, China.

## Table of Contents

|                                                                                  |           |
|----------------------------------------------------------------------------------|-----------|
| <b>General information</b> .....                                                 | <b>3</b>  |
| <b>Experimental Procedures and Characterization Data</b> .....                   | <b>4</b>  |
| Compound <b>12</b> .....                                                         | 4         |
| Compound <b>S1</b> .....                                                         | 4         |
| Compound <b>13</b> .....                                                         | 4         |
| Compound <b>S2</b> .....                                                         | 5         |
| Compound <b>14a</b> .....                                                        | 5         |
| Compound <b>14b</b> .....                                                        | 6         |
| (±)-Oxoelaeocarpine ( <b>3</b> ) and (±)-oxoisoelaeocarpine ( <b>4</b> ).....    | 7         |
| Compound <b>18</b> .....                                                         | 8         |
| Compound <b>15</b> .....                                                         | 8         |
| (±)-Elaeocarpine ( <b>1</b> ).....                                               | 9         |
| Compound <b>16</b> .....                                                         | 9         |
| Compound <b>17</b> .....                                                         | 10        |
| Compound <b>S4</b> .....                                                         | 10        |
| (±)-Elaeocarfoline A ( <b>6</b> ).....                                           | 11        |
| Compound <b>20</b> .....                                                         | 11        |
| (±)-isoelaeocarpine ( <b>2</b> ).....                                            | 12        |
| Compound <b>S5</b> .....                                                         | 12        |
| Compound <b>S6</b> .....                                                         | 13        |
| (±)-Elaeocarfoline B ( <b>7</b> ).....                                           | 13        |
| <b>NMR Data Comparison between Synthetic and Isolated Natural Products</b> ..... | <b>15</b> |
| Table S1. Elaeocarpine ( <b>1</b> ).....                                         | 15        |
| Table S2. Isoelaeocarpine ( <b>2</b> ).....                                      | 16        |
| Table S3. Oxoelaeocarpine ( <b>3</b> ).....                                      | 17        |
| Table S4. Oxoisoelaeocarpine ( <b>4</b> ).....                                   | 18        |
| Table S5. Elaeocarfoline A ( <b>6</b> ).....                                     | 19        |
| Table S6. Elaeocarfoline B ( <b>7</b> ).....                                     | 20        |
| <b>X-Ray Crystallographic Data for Compound 18</b> .....                         | <b>21</b> |
| <b>References</b> .....                                                          | <b>23</b> |
| <b>NMR Spectra</b> .....                                                         | <b>24</b> |
| Compound <b>S1</b> <sup>1</sup> H NMR (400 MHz, Chloroform- <i>d</i> ).....      | 24        |
| Compound <b>S1</b> <sup>13</sup> C NMR (101 MHz, Chloroform- <i>d</i> ).....     | 25        |
| Compound <b>13</b> <sup>1</sup> H NMR (400 MHz, Chloroform- <i>d</i> ).....      | 26        |
| Compound <b>13</b> <sup>13</sup> C NMR (101 MHz, Chloroform- <i>d</i> ).....     | 27        |
| Compound <b>S2</b> <sup>1</sup> H NMR (500 MHz, Chloroform- <i>d</i> ).....      | 28        |
| Compound <b>S2</b> <sup>13</sup> C NMR (126 MHz, Chloroform- <i>d</i> ).....     | 29        |
| Compound <b>14a</b> <sup>1</sup> H NMR (400 MHz, Chloroform- <i>d</i> ).....     | 30        |
| Compound <b>14a</b> <sup>13</sup> C NMR (101 MHz, Chloroform- <i>d</i> ).....    | 31        |

|                                                                                         |    |
|-----------------------------------------------------------------------------------------|----|
| Compound <b>14b</b> <sup>1</sup> H NMR (400 MHz, Chloroform- <i>d</i> ).....            | 32 |
| Compound <b>14b</b> <sup>13</sup> C NMR (101 MHz, Chloroform- <i>d</i> ).....           | 33 |
| Compound <b>3</b> <sup>1</sup> H NMR (400 MHz, Methanol- <i>d</i> <sub>4</sub> ).....   | 34 |
| Compound <b>3</b> <sup>13</sup> C NMR (101 MHz, Methanol- <i>d</i> <sub>4</sub> ).....  | 35 |
| Compound <b>4</b> <sup>1</sup> H NMR (400 MHz, Methanol- <i>d</i> <sub>4</sub> ).....   | 36 |
| Compound <b>4</b> <sup>13</sup> C NMR (400 MHz, Methanol- <i>d</i> <sub>4</sub> ).....  | 37 |
| Compound <b>18</b> <sup>1</sup> H NMR (400 MHz, Methanol- <i>d</i> <sub>4</sub> ).....  | 38 |
| Compound <b>18</b> <sup>13</sup> C NMR (101 MHz, Methanol- <i>d</i> <sub>4</sub> )..... | 39 |
| Compound <b>18</b> COSY (Methanol- <i>d</i> <sub>4</sub> ).....                         | 40 |
| Compound <b>18</b> NOESY (Methanol- <i>d</i> <sub>4</sub> ).....                        | 41 |
| Compound <b>18</b> HMBC (Methanol- <i>d</i> <sub>4</sub> ).....                         | 42 |
| Compound <b>15</b> <sup>1</sup> H NMR (400 MHz, Chloroform- <i>d</i> ).....             | 43 |
| Compound <b>15</b> <sup>13</sup> C NMR (101 MHz, Chloroform- <i>d</i> ).....            | 44 |
| Compound <b>1</b> <sup>1</sup> H NMR (400 MHz, Methanol- <i>d</i> <sub>4</sub> ).....   | 45 |
| Compound <b>1</b> <sup>13</sup> C NMR (101 MHz, Methanol- <i>d</i> <sub>4</sub> ).....  | 46 |
| Compound <b>17</b> <sup>1</sup> H NMR (400 MHz, Chloroform- <i>d</i> ).....             | 47 |
| Compound <b>17</b> <sup>13</sup> C NMR (101 MHz, Chloroform- <i>d</i> ).....            | 48 |
| Compound <b>S4</b> <sup>1</sup> H NMR (400 MHz, Acetone- <i>d</i> <sub>6</sub> ).....   | 49 |
| Compound <b>S4</b> <sup>13</sup> C NMR (101 MHz, Acetone- <i>d</i> <sub>6</sub> ).....  | 50 |
| Compound <b>S4</b> HSQC (Acetone- <i>d</i> <sub>6</sub> ).....                          | 51 |
| Compound <b>S4</b> HMBC (Acetone- <i>d</i> <sub>6</sub> ).....                          | 52 |
| Compound <b>S4</b> COSY (Acetone- <i>d</i> <sub>6</sub> ).....                          | 53 |
| Compound <b>S4</b> NOESY (Acetone- <i>d</i> <sub>6</sub> ).....                         | 54 |
| Compound <b>6</b> <sup>1</sup> H NMR (500 MHz, Acetone- <i>d</i> <sub>6</sub> ).....    | 55 |
| Compound <b>6</b> <sup>13</sup> C NMR (126 MHz, Acetone- <i>d</i> <sub>6</sub> ).....   | 56 |
| Compound <b>20</b> <sup>1</sup> H NMR (400 MHz, Chloroform- <i>d</i> ).....             | 57 |
| Compound <b>20</b> <sup>13</sup> C NMR (101 MHz, Chloroform- <i>d</i> ).....            | 58 |
| Compound <b>2</b> <sup>1</sup> H NMR (400 MHz, Methanol- <i>d</i> <sub>4</sub> ).....   | 59 |
| Compound <b>2</b> <sup>13</sup> C NMR (101 MHz, Methanol- <i>d</i> <sub>4</sub> ).....  | 60 |
| Compound <b>S5</b> <sup>1</sup> H NMR (400 MHz, Chloroform- <i>d</i> ).....             | 61 |
| Compound <b>S5</b> <sup>13</sup> C NMR (101 MHz, Chloroform- <i>d</i> ).....            | 62 |
| Compound <b>S6</b> <sup>1</sup> H NMR (400 MHz, Acetone- <i>d</i> <sub>6</sub> ).....   | 63 |
| Compound <b>S6</b> <sup>13</sup> C NMR (101 MHz, Acetone- <i>d</i> <sub>6</sub> ).....  | 64 |
| Compound <b>S6</b> HSQC (Acetone- <i>d</i> <sub>6</sub> ).....                          | 65 |
| Compound <b>S6</b> COSY (Acetone- <i>d</i> <sub>6</sub> ).....                          | 66 |
| Compound <b>S6</b> NOESY (Acetone- <i>d</i> <sub>6</sub> ).....                         | 67 |
| Compound <b>7</b> <sup>1</sup> H NMR (500 MHz, Acetone- <i>d</i> <sub>6</sub> ).....    | 68 |
| Compound <b>7</b> <sup>13</sup> C NMR (126 MHz, Acetone- <i>d</i> <sub>6</sub> ).....   | 69 |

**General information.**

All moisture and oxygen sensitive reactions were performed in flame-dried glassware under a slight nitrogen overpressure. All reactions were stirred magnetically. Sensitive solutions, solvents or reagents were transferred via cannula or syringe. Reactions were monitored by thin-layer chromatography (TLC) or NMR of the crude mixture. Evaporations were conducted under reduced pressure at temperatures less than 35 °C, unless otherwise noted. Further dryings of the residues were accomplished using a high vacuum pump. All solvents were purchased as the highest available grade from Sinopharm Chemical, Damas-beta, Macklin, General Reagent. All other reagents were used as received from Energy Chemical, Sinopharm Chemical, Accela, Bidepharm, Macklin, 3Achem, unless otherwise noted. Thin-layer chromatography was carried out on pre-coated Leyan HPTLC Silica Gel 60 GF254 to monitor all reactions. The detection of spots was first performed by using a UV (254 nm) lamp followed by visualization by an iodine based TLC stain. Preparative column chromatography was performed with silica gel from SiliaFlash (0.040-0.063  $\mu\text{m}$ , 240-400 mesh). All NMR spectra were measured on Bruker Avance III 400 or Avance III 500. Chemical shifts are given in ppm and referenced to the solvent residual peaks (Chloroform-*d*  $^1\text{H}$ ,  $\delta = 7.26$  ppm,  $^{13}\text{C}$ ,  $\delta = 77.16$  ppm, Methanol-*d*<sub>4</sub>  $^1\text{H}$ ,  $\delta = 3.31$  ppm,  $^{13}\text{C}$ ,  $\delta = 49.00$  ppm; Acetone-*d*<sub>6</sub>  $^1\text{H}$ ,  $\delta = 2.05$  ppm,  $^{13}\text{C}$ ,  $\delta = 29.84$  ppm). Data are reported as follows: chemical shift, multiplicity (s = singlet, d = doublet, t = triplet, q = quartet, m = multiplet), coupling constant *J*, integration. High-resolution mass spectra were measured on Agilent 1290/6545 UHPLC-QTOF/MS. Melting points were recorded on a SGWX-4A melting point apparatus (Shanghai instrument physical optics instrument Co., LTD.) and are uncorrected.

## Experimental Procedures and Characterization Data

### Compound 12

#### 3-(2,5-dioxopyrrolidin-1-yl) propanal

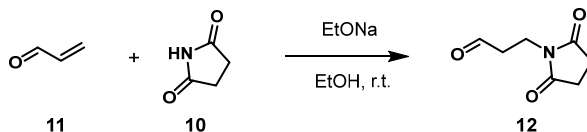

The following protocols were applied according to that described in literature.<sup>[1]</sup> Succinimide **10** (19.8 g, 200.0 mmol, 1.0 equiv) was added to a solution of EtONa (136 mg, 1 mol%) in absolute EtOH (40 mL) to give a white suspension. A solution of acrolein (13.5 mL, 1.0 equiv) in EtOH (40 mL) was then added at a rate such that the internal temperature was maintained below 30 °C (water bath). After additional 2 hours at room temperature, glacial acetic acid (0.8 mL) was added. The mixture was filtered over silica gel (20 g, 100-200 mesh), evaporated and purified by flash column chromatography (silica gel, 1:20 EtOAc:CH<sub>2</sub>Cl<sub>2</sub>) to give **12** as semipure viscous oil (21.4 g, 45% purity by NMR), which was directly used in the next step without further purification.

### Compound S1

#### 1-(3-hydroxy-5-(2-hydroxy-6-methylphenyl)-5-oxopentyl) pyrrolidine-2,5-dione

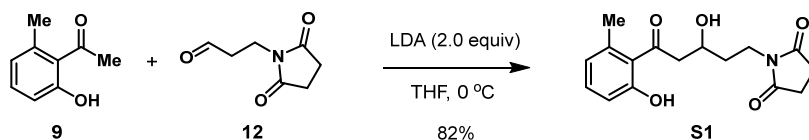

A solution of acetophenone **9** (5.2 g, 34.7 mmol, 1.0 equiv) in THF (70 mL) under argon was cooled to 0 °C and LDA (2.0 M in THF, 35.0 mL, 2.0 equiv) was added dropwise. After 1 hour, compound **12** (12.0 g, 1.0 equiv) was added dropwise. The resulting mixture was further stirred at 0 °C for 5 hours before quenched with saturated NH<sub>4</sub>Cl (50 mL) and extracted with EtOAc (30 mL × 3). The combined organic layers were washed with brine, dried over anhydrous Na<sub>2</sub>SO<sub>4</sub>, evaporated and purified by flash column chromatography (silica gel, 1:50 MeOH:CH<sub>2</sub>Cl<sub>2</sub>) to afford compound **S1** (8.7 g, 82%).

**Physical State:** yellow oil.

**<sup>1</sup>H NMR (400 MHz, Chloroform-*d*):** δ 7.20 (t, *J* = 7.8 Hz, 1H), 6.76 (d, *J* = 8.2 Hz, 1H), 6.69 (d, *J* = 7.5 Hz, 1H), 4.22 – 4.14 (m, 1H), 3.72 – 3.66 (m, 2H), 3.16 (dd, *J* = 16.8, 8.9 Hz, 1H), 2.87 (dd, *J* = 16.7, 3.2 Hz, 1H), 2.71 (s, 4H), 2.42 (s, 3H), 1.82 – 1.71 (m, 2H).

**<sup>13</sup>C NMR (101 MHz, Chloroform-*d*):** δ 207.3, 178.1, 159.4, 138.2, 133.6, 124.4, 123.1, 116.0, 66.2, 50.7, 35.5, 34.5, 28.3, 22.9.

**HRMS (ESI-TOF):** calculated for C<sub>16</sub>H<sub>20</sub>NO<sub>5</sub><sup>+</sup> [M+H]<sup>+</sup>: 306.1336; found: 306.1332.

### Compound 13

#### 1-(2-(5-methyl-4-oxochroman-2-yl) ethyl) pyrrolidine-2,5-dione

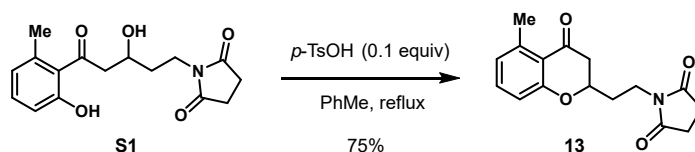

Compound **S1** (11.7 g, 38.4 mmol, 1.0 equiv), *p*-TsOH (730 mg, 0.1 equiv) and toluene (150 mL) were successively added to a Dean-stark apparatus equipped with a stir bar and the mixture was heated at reflux for 3 hours. After cooled to room temperature, the reaction mixture was neutralized with saturated NaHCO<sub>3</sub> (30 mL) and extracted with CH<sub>2</sub>Cl<sub>2</sub> (100 mL × 3). The combined organic layers were dried over anhydrous Na<sub>2</sub>SO<sub>4</sub>, evaporated and purified by flash column chromatography (silica gel, 1:1 EtOAc:PE) to afford **13** (8.27 g, 75%).

**Physical State:** yellow oil.

**<sup>1</sup>H NMR (400 MHz, Chloroform-*d*):** δ 7.29 (t, *J* = 7.9 Hz, 1H), 6.79 (t, *J* = 8.3 Hz, 2H), 4.45 – 4.36 (m, 1H), 3.85 – 3.70 (m, 2H), 2.78 – 2.63 (m, 2H), 2.71 (s, 4H), 2.60 (s, 3H), 2.16 – 2.05 (m, 1H), 2.02 – 1.93 (m, 1H).

**<sup>13</sup>C NMR (101 MHz, Chloroform-*d*):** δ 193.0, 177.0, 162.1, 141.7, 134.4, 124.5, 119.3, 115.6, 74.9, 43.9, 34.9, 32.3, 28.0, 22.6.

**HRMS (ESI-TOF):** calculated for C<sub>16</sub>H<sub>18</sub>NO<sub>4</sub><sup>+</sup> [M+H]<sup>+</sup>: 288.1230; found: 288.1230.

## Compound S2

### (*E*)-1-(5-(2-hydroxy-6-methylphenyl)-5-oxopent-3-en-1-yl)pyrrolidine-2,5-dione

Hydroxyketone **S1** undergoes a dehydration/oxa-Michael process to afford chromaone **13**. Enone **S2** was identified as the intermediate. Control experiments showed that the reaction is temperature dependent.

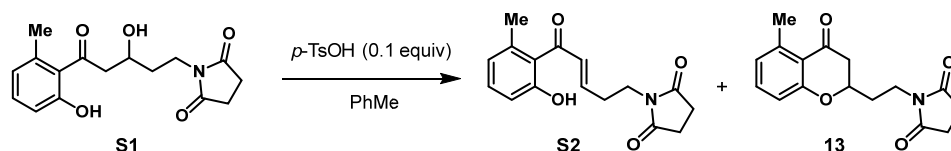

| Entry | Temperature | Time | S1/S2/13 (%) <sup>a</sup> |
|-------|-------------|------|---------------------------|
| 1     | 80 °C       | 1 h  | 49/36/trace               |
| 2     | 80 °C       | 2 h  | 31/58/trace               |
| 3     | 100 °C      | 1 h  | 6/25/50                   |

<sup>a</sup>Determined by crude <sup>1</sup>H NMR using (CHCl<sub>2</sub>)<sub>2</sub> as an internal standard

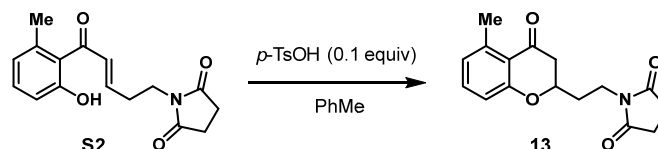

| Entry | Temperature | Time | S2/13 (%) <sup>a</sup> |
|-------|-------------|------|------------------------|
| 1     | 80 °C       | 1 h  | >95/trace              |
| 2     | 100 °C      | 1 h  | 15/83                  |

<sup>a</sup>Determined by crude <sup>1</sup>H NMR using (CHCl<sub>2</sub>)<sub>2</sub> as an internal standard

**Physical State:** yellow oil.

**<sup>1</sup>H NMR (500 MHz, Chloroform-*d*):** δ 10.29 (s, 1H), 7.25 (t, *J* = 7.8 Hz, 1H), 6.82 (dt, *J* = 15.1, 6.9 Hz, 1H), 6.80 (d, *J* = 8.3 Hz, 1H), 6.73 (d, *J* = 7.5 Hz, 1H), 6.64 (dt, *J* = 15.4, 1.4 Hz, 1H), 3.70 (t, *J* = 7.1 Hz, 2H), 2.70 (s, 4H), 2.60 (qd, *J* = 7.1, 1.4 Hz, 2H), 2.44 (s, 3H).

**<sup>13</sup>C NMR (126 MHz, Chloroform-*d*):** δ 196.8, 177.1, 160.2, 143.6, 138.3, 133.8, 133.1, 123.1, 122.9, 115.5, 37.2, 30.8, 28.3, 22.9.

**HRMS (ESI-TOF):** calculated for C<sub>16</sub>H<sub>18</sub>NO<sub>4</sub><sup>+</sup> [M+H]<sup>+</sup>: 288.1230; found: 288.1225.

## Compound 14a

### 5-hydroxy-1-(2-(5-methyl-4-oxochroman-2-yl) ethyl) pyrrolidin-2-one

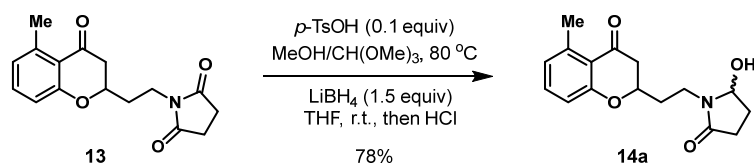

A mixture of compound **13** (2.18 g, 7.6 mmol, 1.0 equiv) and *p*-TsOH (144 mg, 0.1 equiv) in MeOH (16 mL) and CH(OMe)<sub>3</sub> (32 mL) was heated at 80 °C. After complete consumption of **13** as indicated by TLC, solvents were removed under reduced pressure. The residual was then redissolved in THF (38 mL) and added to a solution of LiBH<sub>4</sub> (250 mg, 11.4 mmol, 1.5 equiv) in THF (12 mL) under argon at room temperature. After 5 hours, the reaction was quenched with saturated NH<sub>4</sub>Cl and extracted with EtOAc (50 mL × 3). The organic layers were combined, washed with brine (100 mL), dried over anhydrous Na<sub>2</sub>SO<sub>4</sub>, and concentrated under reduced pressure. The residue was redissolved in THF (38 mL), and concentrated HCl (4 mL) was added. After stirring at room temperature for 1 hour, the mixture was neutralized with saturated NaHCO<sub>3</sub> (100 mL) and extracted with CH<sub>2</sub>Cl<sub>2</sub> (50 mL × 3). The organic layers were combined, dried over anhydrous Na<sub>2</sub>SO<sub>4</sub>, evaporated and purified by flash column chromatography (silica gel, 2:1 EtOAc:PE) to afford hemiaminal **14a** (1.71 g, 78%) as mixture of diastereomers.

**Physical State:** yellow oil.

**<sup>1</sup>H NMR (400 MHz, Chloroform-*d*):** δ 7.29 (dd, *J* = 8.3, 7.5 Hz, 1H), 6.81 (d, *J* = 8.4 Hz, 1H), 6.78 (d, *J* = 7.5 Hz, 1H), 5.25 (t, *J* = 6.4 Hz, 1H), 4.53 – 4.37 (m, 1H), 3.94 (d, *J* = 8.0 Hz, 0.55H), 3.87 (d, *J* = 7.9 Hz, 0.45H), 3.67 – 3.46 (m, 2H), 2.76 – 2.61 (m, 2H), 2.60 (s, 3H), 2.58 – 2.51 (m, 1H), 2.39 – 2.25 (m, 2H), 2.15 – 1.88 (m, 3H).

**<sup>13</sup>C NMR (101 MHz, Chloroform-*d*):** δ 193.84 (193.76), 175.21 (175.18), 162.44 (162.38), 142.25 (142.24), 134.9, 124.91 (124.90), 119.6, 115.9 (115.8), 84.1 (83.8), 75.2, 44.43 (44.40), 36.92 (36.85), 33.2 (33.0), 29.02 (28.99), 28.6 (28.5), 22.9. (The data in parentheses are peaks observed for diastereomers)

**HRMS (ESI-TOF):** calculated for C<sub>16</sub>H<sub>19</sub>NNaO<sub>4</sub><sup>+</sup> [M+Na]<sup>+</sup>: 312.1206; found: 312.1201.

## Compound 14b

### 5-methoxy-1-(2-(5-methyl-4-oxochroman-2-yl) ethyl) pyrrolidin-2-one

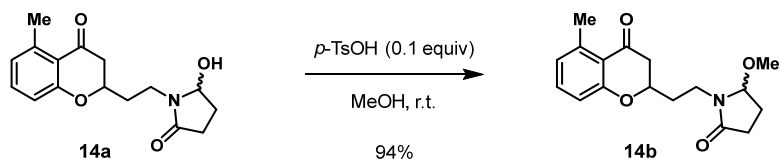

To a 250 mL flask equipped with a stir bar were added hemiaminal **14a** (1.15 g, 4.0 mmol, 1.0 equiv), *p*-TsOH (76 mg, 0.1 equiv) and MeOH (40 mL). The mixture was allowed to stir at room temperature overnight. After neutralizing with saturated NaHCO<sub>3</sub> (10 mL), the reaction mixture was extracted with CH<sub>2</sub>Cl<sub>2</sub> (30 mL × 3). The organic layers were combined, dried over anhydrous Na<sub>2</sub>SO<sub>4</sub>, evaporated and purified by flash column chromatography (silica gel, 1:1 EtOAc:PE) to afford compound **14b** (1.14 g, 94%) as mixture of diastereomers.

**Physical State:** pale-yellow oil.

**<sup>1</sup>H NMR (400 MHz, Chloroform-*d*):** δ 7.31 – 7.25 (m, 1H), 6.82 (d, *J* = 8.2 Hz, 0.45 H), 6.81 (d, *J* = 8.2 Hz, 0.55 H), 6.77 (d, *J* = 7.4 Hz, 0.55 H), 6.76 (d, *J* = 7.4 Hz, 0.45 H), 4.95 – 4.90 (m, 1H), 4.48 – 4.34 (m, 1H), 3.69

– 3.60 (m, 1H), 3.48 – 3.38 (m, 1H), 3.27 (s, 1.65 H), 3.25 (s, 1.35 H), 2.76 – 2.63 (m, 2H), 2.60 (s, 3H), 2.55 – 2.45 (m, 1H), 2.35 – 2.26 (m, 1H), 2.19 – 1.93 (m, 4H).

**<sup>13</sup>C NMR (101 MHz, Chloroform-*d*):**  $\delta$  193.6 (193.5), 175.3 (175.2), 162.5 (162.4), 142.22 (142.15), 134.71 (134.69), 124.8 (124.7), 119.69 (119.65), 115.9 (115.8), 91.0 (90.5), 75.1 (75.0), 53.1 (53.0), 44.5, 37.3, 33.2 (33.0), 29.01 (28.96), 24.03 (23.98), 22.9. (Data in parentheses are peaks observed for diastereomers)

**HRMS (ESI-TOF):** calculated for C<sub>17</sub>H<sub>21</sub>NNaO<sub>4</sub><sup>+</sup> [M+Na]<sup>+</sup>: 326.1363; found: 326.1356.

#### (±)-Oxoelaeocarpine (3) and (±)-oxoisoelaeocarpine (4)

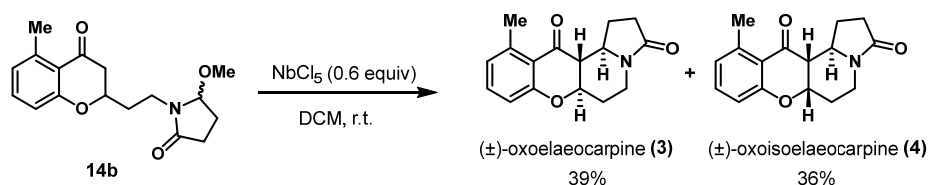

NbCl<sub>5</sub> (278 mg, 1.0 mmol, 0.6 equiv) in CH<sub>2</sub>Cl<sub>2</sub> (4 mL) was cooled to 0 °C under argon and a solution of **14b** (521 mg, 1.72 mmol, 1.0 equiv) in CH<sub>2</sub>Cl<sub>2</sub> (6 mL) was added dropwise. After stirring at 0 °C for 30 minutes, the reaction mixture was allowed to raise to room temperature and stirred for another 24 hours. The reaction was neutralized with saturated NaHCO<sub>3</sub> (10 mL) and extracted with EtOAc (20 mL × 3). The organic layers were combined, dried over anhydrous Na<sub>2</sub>SO<sub>4</sub>, evaporated and purified by flash column chromatography (silica gel, 1:20 E<sub>2</sub>O:CH<sub>2</sub>Cl<sub>2</sub>) to afford (±)-oxoelaeocarpine (**3**, 182 mg, 39%) and (±)-oxoisoelaeocarpine (**4**, 168 mg, 36%).

(±)-oxoelaeocarpine (**3**):

**Physical State:** white solid.

**m.p.:** 205 - 206 °C.

**<sup>1</sup>H NMR (400 MHz, Methanol-*d*<sub>4</sub>):**  $\delta$  7.35 (t, *J* = 7.9 Hz, 1H), 6.84 (d, *J* = 7.9 Hz, 1H), 6.82 (d, *J* = 6.9 Hz, 1H), 4.41 (td, *J* = 12.5, 4.4 Hz, 1H), 4.17 (dd, *J* = 13.5, 3.8 Hz, 1H), 3.78 (dt, *J* = 10.1, 7.3 Hz, 1H), 2.82 (t, *J* = 13.0 Hz, 1H), 2.73 – 2.63 (m, 1H), 2.67 (dd, *J* = 12.8, 10.4 Hz, 1H), 2.58 (s, 3H), 2.52 – 2.35 (m, 2H), 2.25 (d, *J* = 12.4 Hz, 1H), 2.02 – 1.90 (m, 1H), 1.89 – 1.76 (m, 1H).

**<sup>13</sup>C NMR (101 MHz, Methanol-*d*<sub>4</sub>):**  $\delta$  194.8, 176.3, 163.3, 142.7, 135.9, 125.6, 120.5, 116.7, 78.6, 56.9, 56.1, 37.8, 31.5, 31.4, 26.3, 22.7.

**HRMS (ESI-TOF):** calculated for C<sub>16</sub>H<sub>18</sub>NO<sub>3</sub><sup>+</sup> [M+H]<sup>+</sup>: 272.1281; found: 272.1287.

(±)-oxoisoelaeocarpine (**4**):

**Physical State:** white solid.

**m.p.:** 160 - 162 °C.

**<sup>1</sup>H NMR (400 MHz, Methanol-*d*<sub>4</sub>):**  $\delta$  7.39 (t, *J* = 7.9 Hz, 1H), 6.92 (d, *J* = 8.4 Hz, 1H), 6.86 (d, *J* = 7.5 Hz, 1H), 4.75 (d, *J* = 3.1 Hz, 1H), 4.01 (dd, *J* = 13.4, 5.8 Hz, 1H), 3.79 (dt, *J* = 11.2, 6.9 Hz, 1H), 3.19 (t, *J* = 12.0 Hz, 1H), 2.59 (s, 3H), 2.44 (br, d, *J* = 11.5 Hz, 1H), 2.42 – 2.29 (m, 2H), 2.17 (d, *J* = 14.6 Hz, 1H), 2.10 – 1.99 (m, 2H), 1.86 – 1.74 (m, 1H).

**<sup>13</sup>C NMR (101 MHz, Methanol-*d*<sub>4</sub>):**  $\delta$  194.9, 176.3, 163.9, 143.7, 136.4, 126.1, 119.2, 117.1, 75.1, 55.2, 54.5, 35.6, 30.7, 29.1, 23.3, 23.1.

**HRMS (ESI-TOF):** calculated for C<sub>16</sub>H<sub>18</sub>NO<sub>3</sub><sup>+</sup> [M+H]<sup>+</sup>: 272.1281; found: 272.1278.

See the following section for a full comparison of NMR data between synthetic and isolated natural products.



## Compound 18

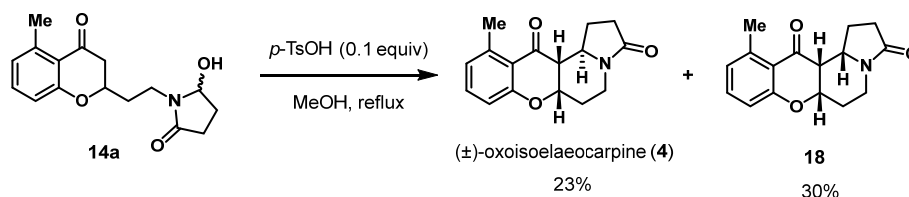

To a 100 mL flask equipped with a stir bar were added hemiaminal **14a** (1.15 g, 4.0 mmol, 1.0 equiv), *p*-TsOH (76 mg, 0.1 equiv) and MeOH (40 mL). The reaction was heated to reflux and stirred for one hour. After neutralizing with saturated NaHCO<sub>3</sub> (20 mL), the reaction mixture was extracted with CH<sub>2</sub>Cl<sub>2</sub> (30 mL × 3). The organic layers were combined, dried over anhydrous Na<sub>2</sub>SO<sub>4</sub>, evaporated and purified by flash column chromatography (silica gel, 1:20 E<sub>2</sub>O:CH<sub>2</sub>Cl<sub>2</sub>) to afford  $(\pm)$ -oxoisoelaecarpine (**4**, 249 mg, 23%) and compound **18** (325 mg, 30%).

**Physical State:** white solid.

**m.p.:** 157 - 158 °C.

**<sup>1</sup>H NMR (400 MHz, Methanol-*d*<sub>4</sub>):**  $\delta$  7.30 (t, *J* = 7.9 Hz, 1H), 6.76 (d, *J* = 2.1 Hz, 1H), 6.75 (d, *J* = 3.3 Hz, 1H), 4.86 (t, *J* = 4.9 Hz, 1H), 4.10 (ddd, *J* = 13.5, 5.6, 1.7 Hz, 1H), 3.82 (dt, *J* = 10.5, 3.5 Hz, 1H), 3.44 – 3.41 (m, 1H), 3.00 – 2.94 (m, 1H), 2.88 – 2.82 (m, 1H), 2.50 (s, 3H), 2.47 – 2.43 (m, 1H), 2.43 – 2.38 (m, 1H), 2.25 – 2.30 (m, 1H), 1.84 – 1.80 (m, 1H), 1.77 – 1.71 (m, 1H).

**<sup>13</sup>C NMR (101 MHz, Methanol-*d*<sub>4</sub>):**  $\delta$  195.3, 176.7, 161.0, 141.9, 136.0, 125.1, 120.6, 116.9, 77.8, 58.3, 58.2, 38.0, 31.7, 25.6, 22.4, 21.5.

**HRMS (ESI-TOF):** calculated for C<sub>16</sub>H<sub>18</sub>NO<sub>3</sub><sup>+</sup> [M+H]<sup>+</sup>: 272.1281; found: 272.1280.

## Compound 15

### *11-methyl-3-thioxo-1,2,3,5,6,6a,12a,12b-octahydro-12H-chromeno[2,3-*g*]indolizin-12-one*

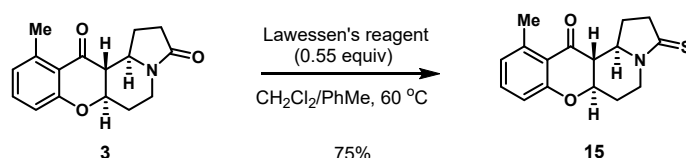

To a 25 mL flask equipped with a stir bar were added  $(\pm)$ -oxoelaecarpine **3** (542 mg, 2.0 mmol, 1.0 equiv), Lawesson's reagent (444 mg, 0.55 equiv), CH<sub>2</sub>Cl<sub>2</sub> (6 mL) and toluene (10 mL). After stirring at 60 °C for 20 minutes, the mixture was evaporated and purified by flash column chromatography (silica gel, 1:5 EtOAc:PE) to afford thioamide **15** (433 mg, 75%).

**Physical State:** white solid.

**m.p.:** 203 - 205 °C.

**<sup>1</sup>H NMR (400 MHz, Chloroform-*d*):**  $\delta$  7.34 (t, *J* = 8.0, 1H), 6.84 (t, *J* = 7.8, 2H), 5.10 (ddd, *J* = 14.0, 5.1, 2.2 Hz, 1H), 4.40 (ddd, *J* = 12.8, 11.2, 4.5 Hz, 1H), 3.96 (dt, *J* = 10.2, 7.7 Hz, 1H), 3.19 – 2.99 (m, 2H), 2.98 – 2.89 (m, 1H), 2.86 – 2.76 (m, 1H), 2.60 (s, 3H), 2.59 (dd, *J* = 12.8, 2.6 Hz, 1H), 2.41 – 2.33 (m, 1H), 2.07 – 1.81 (m, 2H).

**<sup>13</sup>C NMR (101 MHz, Chloroform-*d*):**  $\delta$  201.6, 192.6, 161.8, 142.1, 135.2, 125.1, 119.2, 115.7, 76.7, 62.7, 55.1, 44.3, 41.9, 30.1, 27.3, 22.7.

**HRMS (ESI-TOF):** calculated for C<sub>16</sub>H<sub>18</sub>NO<sub>2</sub>S<sup>+</sup> [M+H]<sup>+</sup>: 288.1053; found: 288.1052.

### (±)-Elaeocarpine (1)

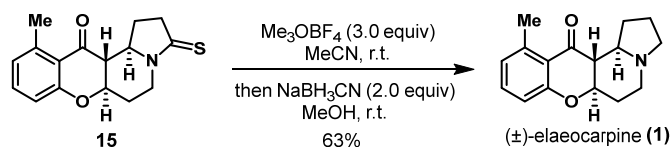

A solution of thioamide **15** (72 mg, 0.25 mmol, 1.0 equiv) in  $\text{CH}_3\text{CN}$  (2.5 mL) was cooled to 0 °C under argon and  $\text{Me}_3\text{OBF}_4$  (111 mg, 3.0 equiv) was added. The mixture was allowed to warm to room temperature and stirred for 2 hours. Solvent was evaporated under reduced pressure and the residue was redissolved in  $\text{MeOH}$  (2.5 mL).  $\text{NaBH}_3\text{CN}$  (32 mg, 2.0 equiv) was added and the resulting mixture was allowed to stir at room temperature for 1 hour. After quenching with saturated  $\text{NH}_4\text{Cl}$  (10 mL), the reaction mixture was extracted with  $\text{EtOAc}$  (10 mL  $\times$  3). The organic layers were combined, washed with brine (20 mL), dried over anhydrous  $\text{Na}_2\text{SO}_4$ , evaporated and purified by flash column chromatography (silica gel, 1:3  $\text{EtOAc}:\text{PE}$ ) to afford (±)-elaecarpine (**1**, 41 mg, 63%).

**Physical State:** white solid.

**m.p.:** 81 - 82 °C.

**$^1\text{H}$  NMR (400 MHz, Methanol- $d_4$ ):**  $\delta$  7.31 (t,  $J = 7.9$  Hz, 1H), 6.81 (d,  $J = 8.4$  Hz, 1H), 6.79 (d,  $J = 7.6$  Hz, 1H), 4.19 (ddd,  $J = 12.6, 10.9, 5.0$  Hz, 1H), 3.17 (ddd,  $J = 11.7, 4.2, 2.7$  Hz, 1H), 3.04 (td,  $J = 9.2, 3.7$  Hz, 1H), 2.60 (dd,  $J = 13.1, 6.4$  Hz, 1H), 2.55 (s, 3H), 2.57 – 2.50 (m, 1H), 2.28 – 2.16 (m, 3H), 2.15 – 2.03 (m, 2H), 1.91 – 1.81 (m, 2H), 1.64 – 1.51 (m, 1H).

**$^{13}\text{C}$  NMR (101 MHz, Methanol- $d_4$ ):**  $\delta$  195.4, 163.4, 142.6, 135.5, 125.5, 120.6, 116.6, 79.6, 63.4, 55.1, 53.5, 49.7, 32.1, 31.0, 22.8, 22.7.

**HRMS (ESI-TOF):** calculated for  $\text{C}_{16}\text{H}_{20}\text{NO}_2^+$   $[\text{M}+\text{H}]^+$ : 258.1489; found: 258.1484.

See the following section for a full comparison of NMR data between synthetic and isolated natural products.

### Compound 16

#### 2-bromo-1-(2-methoxy-6-methylphenyl) ethan-1-one

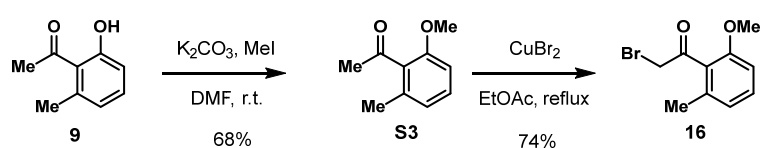

To a 100 mL flask equipped with a stir bar were added acetophenone **9** (4.3 g, 28.7 mmol, 1.0 equiv),  $\text{MeI}$  (3.6 mL, 2.0 equiv),  $\text{K}_2\text{CO}_3$  (7.9 g, 2.0 equiv) and  $\text{DMF}$  (58 mL). The mixture was stirred at room temperature for 6 hours.  $\text{EtOAc}$  (150 mL) was added and the resulting mixture washed with water (50 mL  $\times$  3) and brine (50 mL) successively. The organic layer was then dried over anhydrous  $\text{Na}_2\text{SO}_4$ , evaporated and purified by flash column chromatography (silica gel, 1:10  $\text{EtOAc}:\text{PE}$ ) to afford compound **S3** (3.2 g, 68%) as yellow oil.

**S3** (1.53 g, 9.33 mmol, 1.0 equiv),  $\text{CuBr}_2$  (4.2 g, 2.0 equiv) and  $\text{EtOAc}$  (75 mL) were added to a 100 mL flask equipped with a stir bar. The resulting mixture was heated to reflux and stirred for 3 hours. After cooling to room temperature, the reaction mixture was filtered over a pad of celite. The filtrate was washed with brine, dried over anhydrous  $\text{Na}_2\text{SO}_4$ , evaporated and purified by flash column chromatography (silica gel, 1:10  $\text{EtOAc}:\text{PE}$ ) to afford bromide **16** (1.67 g, 74%) as brown oil.

**<sup>1</sup>H NMR (400 MHz, Chloroform-*d*):**  $\delta$  7.26 (t, *J* = 8.0 Hz, 1H), 6.83 (d, *J* = 7.7 Hz, 1H), 6.77 (d, *J* = 8.3 Hz, 1H), 4.36 (s, 2H), 3.82 (s, 3H), 2.27 (s, 3H).

Spectroscopic data are in accordance with that reported in the literature.<sup>[2]</sup>

### Compound 17

**(6*aR*,12*aR*,12*bR*,*E*)-3-(2-(2-methoxy-6-methylphenyl)-2-oxoethylidene)-11-methyl-1,2,3,5,6,6*a*,12*a*,12*b*-octahydro-12*H*-chromeno[2,3-*g*]indolizin-12-one**

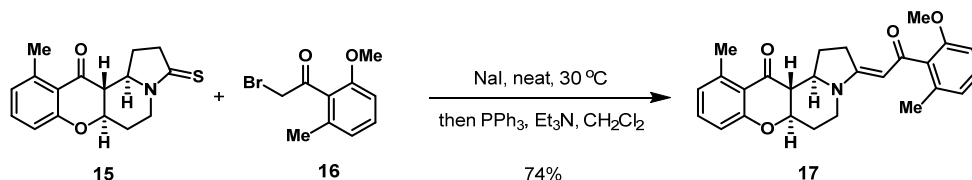

To a 25 mL flask equipped with a stir bar were added thioamide **15** (574 mg, 2.0 mmol, 1.0 equiv), bromide **16** (726 mg, 1.5 equiv), NaI (30 mg, 0.1 equiv) and CH<sub>2</sub>Cl<sub>2</sub> (5 mL). After stirring for 5 minutes, CH<sub>2</sub>Cl<sub>2</sub> was removed under reduced pressure and the resulting mixture was stirred at 30 °C for 48 hours. A solution of PPh<sub>3</sub> (786 mg, 1.5 equiv) in CH<sub>2</sub>Cl<sub>2</sub> (20 mL) were added and stirred for 0.5 hour before Et<sub>3</sub>N (830  $\mu$ L, 3.0 equiv) was added. After stirring for another 3 hours, the reaction was diluted with CH<sub>2</sub>Cl<sub>2</sub> (30 mL) and washed with brine (30 mL), dried over anhydrous Na<sub>2</sub>SO<sub>4</sub>, evaporated and purified by flash column chromatography (silica gel, 1:1 EtOAc:PE) to afford enaminone **17** (614 mg, 74%).

**Physical State:** yellow oil.

**<sup>1</sup>H NMR (400 MHz, Chloroform-*d*):**  $\delta$  7.32 (t, *J* = 7.9 Hz, 1H), 7.14 (t, *J* = 7.9 Hz, 1H), 6.81 (d, *J* = 8.4 Hz, 1H), 6.80 (d, *J* = 6.9 Hz, 1H), 6.77 (d, *J* = 7.7, 1H), 6.73 (d, *J* = 8.3 Hz, 1H), 5.33 (s, 1H), 4.30 (td, *J* = 12.5, 12.0, 4.5 Hz, 1H), 3.80 (dd, *J* = 13.8, 3.3 Hz, 1H), 3.78 (s, 3H), 3.71 – 3.33 (m, 2H), 3.15 – 2.95 (m, 1H), 2.88 (t, *J* = 12.2 Hz, 1H), 2.80 – 2.73 (m, 1H), 2.60 (s, 3H), 2.50 (dd, *J* = 12.7, 10.0 Hz, 1H), 2.26 (s, 3H), 2.29 – 2.22 (m, 1H), 2.02 – 1.90 (m, 1H), 1.83 – 1.70 (m, 1H).

**<sup>13</sup>C NMR (101 MHz, Chloroform-*d*):**  $\delta$  193.0, 192.4, 164.7, 161.7, 155.6, 142.0, 135.4, 134.9, 134.5, 128.3, 124.9, 122.6, 119.3, 115.6, 108.4, 93.5, 77.2, 59.8, 55.9, 54.6, 40.2, 32.8, 30.2, 28.5, 22.7, 19.2.

**HRMS (ESI-TOF):** calculated for C<sub>26</sub>H<sub>28</sub>NO<sub>4</sub><sup>+</sup> [M+H]<sup>+</sup>: 418.2013; found: 418.2018.

### Compound S4

**3-(2-(2-methoxy-6-methylphenyl)-2-oxoethyl)-11-methyl-1,2,3,5,6,6*a*,12*a*,12*b*-octahydro-12*H*-chromeno[2,3-*g*]indolizin-12-one**

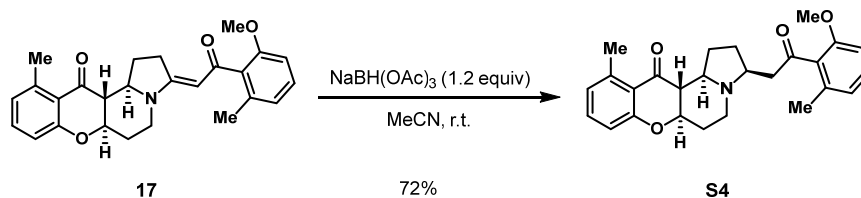

To a solution of enaminone **17** (354 mg, 0.85 mmol, 1.0 equiv) in CH<sub>3</sub>CN (17 mL) was added NaBH(OAc)<sub>3</sub> (216 mg, 1.2 equiv). The mixture was stirred at room temperature overnight. The reaction mixture was diluted with saturated NH<sub>4</sub>Cl (10 mL) and extracted with EtOAc (20 mL  $\times$  3). The organic layers were combined, washed with

brine (30 mL), dried over anhydrous Na<sub>2</sub>SO<sub>4</sub>, evaporated and purified by flash column chromatography (silica gel, 1:3 EtOAc:PE) to afford methylated elaeocarfoline A (**S4**, 255 mg, 72%).

**Physical State:** pale-yellow oil.

**<sup>1</sup>H NMR (400 MHz, Acetone-*d*<sub>6</sub>):** δ 7.34 (t, *J* = 7.9 Hz, 1H), 7.25 (t, *J* = 8.0 Hz, 1H), 6.91 (d, *J* = 8.3 Hz, 1H), 6.81 (t, *J* = 7.9 Hz, 3H), 4.20 (ddd, *J* = 12.4, 5, 1.2 Hz, 1H), 3.86 (s, 3H), 3.20 – 3.17 (m, 1H), 3.17 – 3.14 (m, 1H), 2.82 – 2.67 (m, 2H), 2.54 (s, 3H), 2.48 (dd, *J* = 9.6, 3.2 Hz, 1H), 2.46 – 2.42 (m, 1H), 2.20 (s, 3H), 2.20 – 2.13 (m, 2H), 2.13 – 2.07 (m, 1H), 2.03 (d, *J* = 4.0 Hz, 1H), 1.91 (m, 1H), 1.57 – 1.43 (m, 2H).

**<sup>13</sup>C NMR (101 MHz, Acetone-*d*<sub>6</sub>):** δ 206.2, 194.8, 162.8, 157.3, 141.9, 136.3, 134.9, 132.1, 130.8, 125.0, 123.7, 120.5, 116.3, 109.5, 79.5, 63.2, 59.5, 56.0, 55.3, 49.8, 47.6, 32.4, 30.7, 29.3, 22.6, 19.2.

**HRMS (ESI-TOF):** calculated for C<sub>26</sub>H<sub>30</sub>NO<sub>4</sub><sup>+</sup> [M+H]<sup>+</sup>: 420.2169; found: 420.2163.

### (±)-Elaeocarfoline A (**6**)

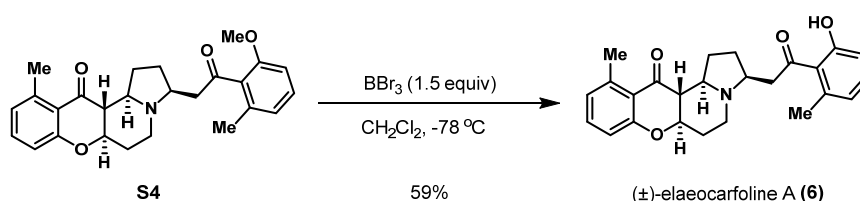

Compound **S4** (132 mg, 0.32 mmol, 1.0 equiv) was dissolved in CH<sub>2</sub>Cl<sub>2</sub> (3.6 mL) and cooled to -78 °C under argon. BBr<sub>3</sub> (1.0 M in CH<sub>2</sub>Cl<sub>2</sub>, 480 μL, 1.5 equiv) was added dropwise. After stirring at -78 °C for 5 hours, the reaction was quenched by addition of saturated NaHCO<sub>3</sub> (10 mL) and extracted with EtOAc (10 mL × 3). The organic layers were combined, washed with brine (20 mL), dried over anhydrous Na<sub>2</sub>SO<sub>4</sub>, evaporated and purified by flash column chromatography (silica gel, 1:3 EtOAc:PE) to afford (±)-elaecarfoline A (**6**, 75 mg, 59%).

**Physical State:** pale-yellow oil.

**<sup>1</sup>H NMR (500 MHz, Acetone-*d*<sub>6</sub>):** δ 9.40 (s, 1H), 7.34 (t, *J* = 7.9 Hz, 1H), 7.13 (t, *J* = 7.9 Hz, 1H), 6.82 (d, *J* = 8.0 Hz, 1H), 6.81 (d, *J* = 7.2 Hz, 1H), 6.77 (d, *J* = 8.2 Hz, 1H), 6.73 (d, *J* = 7.6 Hz, 1H), 4.20 (ddd, *J* = 12.6, 11.1, 5.0 Hz, 1H), 3.28 (dd, *J* = 16.2, 3.8 Hz, 1H), 3.22 – 3.17 (m, 1H), 2.92 (dd, *J* = 16.2, 8.3 Hz, 1H), 2.84 – 2.78 (m, 1H), 2.54 (s, 3H), 2.52 (dd, *J* = 12.7, 9.6 Hz, 1H), 2.49 – 2.43 (m, 1H), 2.26 (s, 3H), 2.24 – 2.19 (m, 1H), 2.19 – 2.14 (m, 1H), 2.14 – 2.07 (m, 2H), 1.92 (qd, *J* = 11.9, 4.4 Hz, 1H), 1.65 – 1.55 (m, 1H), 1.55 – 1.45 (m, 1H).

**<sup>13</sup>C NMR (126 MHz, Acetone-*d*<sub>6</sub>):** δ 206.8, 194.8, 162.9, 155.9, 142.0, 137.2, 135.0, 131.3, 130.0, 125.0, 122.8, 120.5, 116.3, 114.8, 79.5, 63.4, 60.0, 55.3, 49.5, 47.8, 32.3, 30.5, 29.5, 22.6, 20.1.

**HRMS (ESI-TOF):** calculated for C<sub>25</sub>H<sub>28</sub>NO<sub>4</sub><sup>+</sup> [M+H]<sup>+</sup>: 406.2013; found: 406.2012.

See the following section for a full comparison of NMR data between synthetic and isolated natural products.

### Compound 20

#### 11-methyl-3-thioxo-1,2,3,5,6,6a,12a,12b-octahydro-12H-chromeno[2,3-*g*]indolizin-12-one

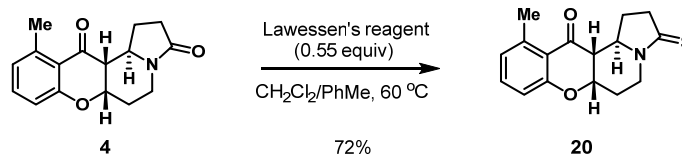

To a 25 mL flask equipped with a stir bar were added (±)-oxisoelaecarpine **4** (227 mg, 0.84 mmol, 1.0 equiv), Lawesson's reagent (186 mg, 0.55 equiv), CH<sub>2</sub>Cl<sub>2</sub> (3 mL) and toluene (5 mL). After stirring at 60 °C for 20 minutes,

the mixture was evaporated and purified by flash column chromatography (silica gel, 1:5 EtOAc:PE) to afford thioamide **20** (172 mg, 72%).

**Physical State:** white solid.

**m.p.:** 162 - 164 °C.

**<sup>1</sup>H NMR (400 MHz, Chloroform-*d*):**  $\delta$  7.37 (t,  $J = 7.9$  Hz, 1H), 6.90 (d,  $J = 8.2$  Hz, 1H), 6.85 (d,  $J = 7.4$  Hz, 1H), 4.90 (dd,  $J = 13.5, 5.0$  Hz, 1H), 4.73 (d,  $J = 2.6$  Hz, 1H), 4.08 (dt,  $J = 11.1, 7.2$  Hz, 1H), 3.43 (t,  $J = 13.8$  Hz, 1H), 3.15 – 3.05 (m, 1H), 3.02 – 2.89 (m, 1H), 2.62 (s, 3H), 2.41 (dd,  $J = 11.2, 2.3$  Hz, 1H), 2.35 – 2.26 (m, 1H), 2.15 – 2.07 (m, 2H), 1.95 – 1.82 (m, 1H).

**<sup>13</sup>C NMR (101 MHz, Chloroform-*d*):**  $\delta$  200.9, 192.5, 162.4, 143.0, 135.5, 125.5, 118.1, 116.1, 73.0, 60.3, 54.3, 43.3, 39.7, 28.3, 23.8, 23.1.

**HRMS (ESI-TOF):** calculated for C<sub>16</sub>H<sub>18</sub>NO<sub>2</sub>S<sup>+</sup> [M+H]<sup>+</sup>: 288.1053; found: 288.1050.

### (±)-isoeleocarpine (**2**)

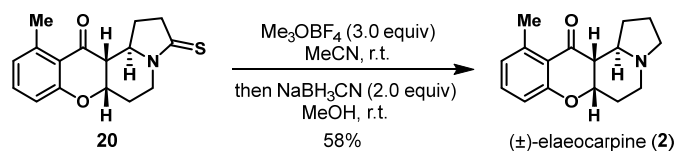

A solution of thioamide **20** (86 mg, 0.3 mmol, 1.0 equiv) in CH<sub>3</sub>CN (3 mL) was cooled to 0 °C under argon and Me<sub>3</sub>OBF<sub>4</sub> (134 mg, 3.0 equiv) was added. The mixture was allowed to warm to room temperature and stirred for 2 hours. Solvent was evaporated under reduced pressure and the residue was redissolved in MeOH (3 mL). NaBH<sub>3</sub>CN (38 mg, 2.0 equiv) was added and the resulting mixture was stirred at room temperature for 1 hour. After quenching with saturated NH<sub>4</sub>Cl (10 mL), the reaction mixture was extracted with EtOAc (10 mL × 3). The organic layers were combined, washed with brine (20 mL), dried over anhydrous Na<sub>2</sub>SO<sub>4</sub>, evaporated and purified by flash column chromatography (silica gel, 1:3 EtOAc:PE) to afford (±)-isoeleocarpine (**2**, 45 mg, 58%).

**Physical State:** white solid.

**m.p.:** 51 - 52 °C.

**<sup>1</sup>H NMR (400 MHz, Methanol-*d*<sub>4</sub>):**  $\delta$  7.35 (t,  $J = 7.8$  Hz, 1H), 6.86 (d,  $J = 8.3$  Hz, 1H), 6.81 (d,  $J = 7.3$  Hz, 1H), 4.65 (s, 1H), 3.08 (t,  $J = 9.0$  Hz, 1H), 3.03 (dd,  $J = 11.2, 4.4$  Hz, 1H), 2.63 – 2.54 (m, 1H), 2.57 (s, 3H), 2.39 (d,  $J = 11.0$  Hz, 1H), 2.33 – 2.25 (m, 1H), 2.23 – 2.17 (m, 1H), 2.17 – 2.10 (m, 1H), 2.01 – 1.90 (m, 1H), 1.85 – 1.75 (m, 1H), 1.75 – 1.60 (m, 3H).

**<sup>13</sup>C NMR (101 MHz, Methanol-*d*<sub>4</sub>):**  $\delta$  195.9, 163.8, 143.3, 136.2, 125.8, 119.4, 117.0, 75.0, 60.2, 55.1, 54.5, 48.0, 30.5, 29.2, 23.1, 21.2.

**HRMS (ESI-TOF):** calculated for C<sub>16</sub>H<sub>20</sub>NO<sub>2</sub><sup>+</sup> [M+H]<sup>+</sup>: 258.1489; found: 258.1488.

See the following section for a full comparison of NMR data between synthetic and isolated natural products.

### Compound S5

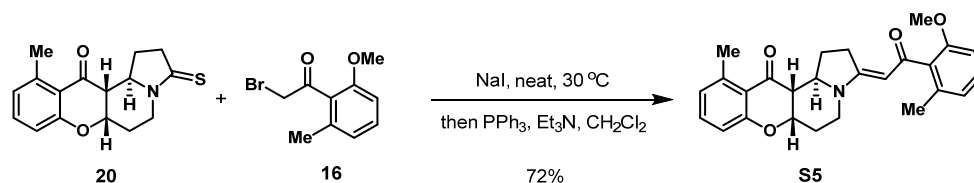

To a 25 mL flask equipped with a stir bar were added thioamide **20** (143 mg, 0.5 mmol, 1.0 equiv), bromide **16** (182 mg, 1.5 equiv), NaI (8 mg, 0.1 equiv) and CH<sub>2</sub>Cl<sub>2</sub> (2 mL). After stirring for 5 minutes, CH<sub>2</sub>Cl<sub>2</sub> was removed under reduced pressure and the resulting mixture was stirred at 30 °C for 48 hours. A solution of PPh<sub>3</sub> (197 mg, 1.5 equiv) in CH<sub>2</sub>Cl<sub>2</sub> (5 mL) were added and stirred for 0.5 hour before Et<sub>3</sub>N (208 μL, 3.0 equiv) was added. After stirring for another 3 hours, the reaction was diluted with CH<sub>2</sub>Cl<sub>2</sub> (10 mL) and washed with brine (10 mL), dried over anhydrous Na<sub>2</sub>SO<sub>4</sub>, evaporated and purified by flash column chromatography (silica gel, 1:1 EtOAc:PE) to afford enaminone **S5** (150 mg, 72%).

**Physical State:** yellow oil.

**<sup>1</sup>H NMR (400 MHz, Chloroform-*d*):** δ 7.33 (t, *J* = 7.9 Hz, 1H), 7.13 (t, *J* = 7.9 Hz, 1H), 6.85 (d, *J* = 8.3 Hz, 1H), 6.82 (d, *J* = 7.4 Hz, 1H), 6.75 (d, *J* = 7.6 Hz, 1H), 6.72 (d, *J* = 8.2 Hz, 1H), 5.34 (s, 1H), 4.70 (d, *J* = 2.3 Hz, 1H), 3.76 (s, 3H), 3.72 – 3.60 (m, 2H), 3.58 – 3.31 (m, 2H), 3.13 – 2.85 (m, 1H), 2.61 (s, 3H), 2.35 (dd, *J* = 11.0, 2.2 Hz, 1H), 2.24 (s, 3H), 2.22 – 2.14 (m, 1H), 2.06 – 1.90 (m, 2H), 1.89 – 1.78 (m, 1H).

**<sup>13</sup>C NMR (101 MHz, Chloroform-*d*):** δ 193.2, 192.4, 164.8, 162.2, 155.6, 142.8, 135.3, 135.2, 134.5, 128.2, 125.3, 122.6, 118.1, 115.9, 108.4, 93.8, 73.3, 57.2, 55.8, 53.9, 38.1, 31.8, 28.0, 25.5, 23.0, 19.1.

**HRMS (ESI-TOF):** calculated for C<sub>26</sub>H<sub>28</sub>NO<sub>4</sub><sup>+</sup> [M+H]<sup>+</sup>: 418.2013; found: 418.2013.

#### Compound S6

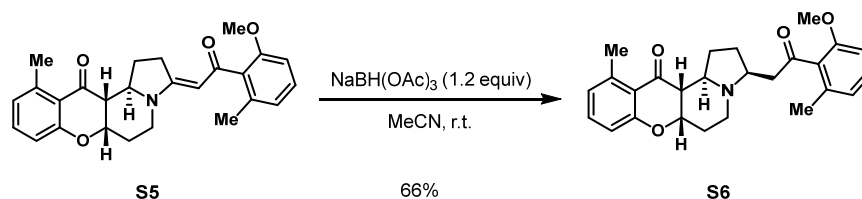

To a solution of enaminone **S5** (184 mg, 0.44 mmol, 1.0 equiv) in CH<sub>3</sub>CN (8 mL) was added NaBH(OAc)<sub>3</sub> (112 mg, 1.2 equiv). The mixture was stirred at room temperature overnight. The reaction mixture was diluted with saturated NH<sub>4</sub>Cl (5 mL) and extracted with EtOAc (5 mL × 3). The organic layers were combined, washed with brine (10 mL), dried over anhydrous Na<sub>2</sub>SO<sub>4</sub>, evaporated and purified by flash column chromatography (silica gel, 1:3 EtOAc:PE) to afford methylated elaeocarfoline B (**S6**, 122 mg, 66%).

**Physical State:** pale-yellow oil.

**<sup>1</sup>H NMR (400 MHz, Acetone-*d*<sub>6</sub>):** δ 7.37 (t, *J* = 7.9 Hz, 1H), 7.25 (t, *J* = 8.0 Hz, 1H), 6.91 (d, *J* = 8.4 Hz, 1H), 6.86 (d, *J* = 8.2 Hz, 1H), 6.82 (d, *J* = 7.5 Hz, 2H), 4.68 (s, 1H), 3.86 (s, 3H), 3.23 – 3.14 (m, 1H), 3.03 (ddd, *J* = 10.9, 4.9, 1.8 Hz, 1H), 2.81 – 2.77 (m, 1H), 2.76 – 2.70 (m, 1H), 2.56 (s, 3H), 2.44 – 2.36 (m, 1H), 2.36 – 2.28 (m, 2H), 2.19 (s, 3H), 2.09 (dd, *J* = 14.3, 2.4 Hz, 1H), 1.97 – 1.80 (m, 2H), 1.57 – 1.44 (m, 3H).

**<sup>13</sup>C NMR (101 MHz, Acetone-*d*<sub>6</sub>):** δ 206.2, 194.8, 163.2, 157.3, 142.5, 136.3, 135.4, 132.1, 130.8, 125.2, 123.7, 119.3, 116.7, 109.5, 74.8, 60.9, 60.0, 56.0, 55.6, 49.8, 46.0, 30.9, 29.2, 28.1, 22.9, 19.2.

**HRMS (ESI-TOF):** calculated for C<sub>26</sub>H<sub>30</sub>NO<sub>4</sub><sup>+</sup> [M+H]<sup>+</sup>: 420.2169; found: 420.2170.

#### (±)-Elaeocarfoline B (**7**)

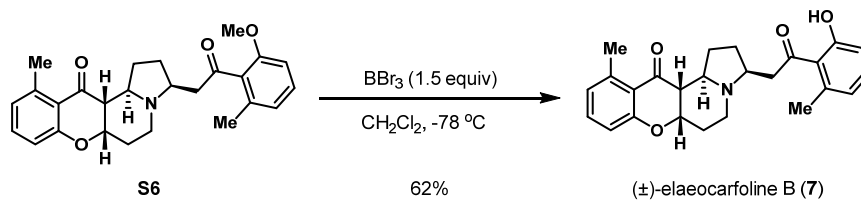

Compound **S6** (121 mg, 0.29 mmol, 1.0 equiv) was dissolved in  $\text{CH}_2\text{Cl}_2$  (2.9 mL) and cooled to  $-78\text{ }^\circ\text{C}$  under argon.  $\text{BBr}_3$  (1.0 M in  $\text{CH}_2\text{Cl}_2$ , 440  $\mu\text{L}$ , 1.5 equiv) was added dropwise. After stirring at  $-78\text{ }^\circ\text{C}$  for 5 hours, the reaction was quenched by addition of saturated  $\text{NaHCO}_3$  (5 mL) and extracted with EtOAc (5 mL  $\times$  3). The organic layers were combined, washed with brine (10 mL), dried over anhydrous  $\text{Na}_2\text{SO}_4$ , evaporated and purified by flash column chromatography (silica gel, 1:3 EtOAc:PE) to afford ( $\pm$ )-elaeocarfoline A (**7**, 73 mg, 62%).

**Physical State:** pale-yellow oil.

**$^1\text{H}$  NMR (500 MHz, Acetone- $d_6$ )**  $\delta$  7.37 (t,  $J = 7.9$  Hz, 1H), 7.12 (t,  $J = 7.9$  Hz, 1H), 6.87 (d,  $J = 8.3$  Hz, 1H), 6.83 (d,  $J = 7.4$  Hz, 1H), 6.76 (d,  $J = 8.2$  Hz, 1H), 6.71 (d,  $J = 7.4$  Hz, 1H), 4.69 (q, like,  $J = 2.3$  Hz, 1H), 3.29 (dd,  $J = 16.1, 3.8$  Hz, 1H), 3.04 (ddd,  $J = 11.0, 5.0, 2.0$  Hz, 1H), 2.91 (dd,  $J = 16.2, 8.3$  Hz, 1H), 2.84 – 2.78 (m, 1H), 2.56 (s, 3H), 2.43 (td,  $J = 12.0, 11.3, 2.8$  Hz, 1H), 2.36 – 2.31 (m, 2H), 2.24 (s, 3H), 2.11 – 2.06 (m, 1H), 1.97 – 1.90 (m, 1H), 1.90 – 1.81 (m, 1H), 1.60 – 1.51 (m, 3H).

**$^{13}\text{C}$  NMR (126 MHz, Acetone- $d_6$ )**  $\delta$  206.8, 194.7, 163.3, 156.0, 142.6, 137.3, 135.5, 131.4, 130.0, 125.3, 122.8, 119.3, 116.7, 114.9, 74.8, 61.4, 60.3, 55.5, 49.6, 46.3, 30.8, 29.1, 28.1, 22.9, 20.1.

**HRMS (ESI-TOF):** calculated for  $\text{C}_{25}\text{H}_{28}\text{NO}_4^+$   $[\text{M}+\text{H}]^+$ : 406.2013; found: 406.2010.

See the following section for a full comparison of NMR data between synthetic and isolated natural products.

## NMR Data Comparison between Synthetic and Isolated Natural Products

Table S1. Elaeocarpine (1)

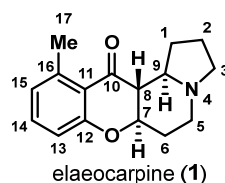

| No.        | $\delta_{\text{H}}$ (isolated)<br>(500 MHz,<br>Methanol- $d_4$ ) <sup>[5]</sup> | $\delta_{\text{H}}$ (synthetic)<br>(400 MHz,<br>Methanol- $d_4$ ) | $\Delta$ | $\delta_{\text{C}}$ (isolated)<br>(125 MHz,<br>Methanol- $d_4$ ) <sup>[5]</sup> | $\delta_{\text{C}}$ (synthetic)<br>(101 MHz,<br>Methanol- $d_4$ ) | $\Delta$ |
|------------|---------------------------------------------------------------------------------|-------------------------------------------------------------------|----------|---------------------------------------------------------------------------------|-------------------------------------------------------------------|----------|
| 1 $\alpha$ | 1.88, m                                                                         | 1.91 – 1.81, m                                                    |          | 30.2                                                                            | 31.0                                                              | 0.8      |
| 1 $\beta$  | 1.57, m                                                                         | 1.64 – 1.51, m                                                    |          |                                                                                 |                                                                   |          |
| 2 $\alpha$ | 1.71, m                                                                         | 1.91 – 1.81, m                                                    |          | 22.0                                                                            | 22.7                                                              | 0.7      |
| 2 $\beta$  | 2.12, m                                                                         | 2.28 – 2.16, m                                                    |          |                                                                                 |                                                                   |          |
| 3          | 3.02, t (8.8)                                                                   | 3.04, td (9.2, 3.7)                                               | 0.02     | 54.3                                                                            | 55.1                                                              | 0.8      |
|            | 2.18, m                                                                         | 2.28 – 2.16, m                                                    |          |                                                                                 |                                                                   |          |
| 5 $\alpha$ | 3.15, dd (13.2,<br>3.6)                                                         | 3.17, ddd (11.7,<br>4.2, 2.7)                                     | 0.02     | 48.7                                                                            | 49.7                                                              | 1.0      |
| 5 $\beta$  | 2.20, m                                                                         | 2.28 – 2.16, m                                                    |          |                                                                                 |                                                                   |          |
| 6          | 2.06, m                                                                         | 2.15 – 2.03, m                                                    |          | 31.3                                                                            | 32.1                                                              | 0.8      |
| 7          | 4.13, m                                                                         | 4.19, ddd (12.6,<br>10.9, 5.0)                                    | 0.06     | 78.5                                                                            | 79.6                                                              | 1.1      |
| 8          | 2.56, m                                                                         | 2.60, (dd, 13.1,<br>6.4)                                          | 0.04     | 52.7                                                                            | 53.5                                                              | 0.8      |
| 9          | 2.53, m                                                                         | 2.57 – 2.50, m                                                    |          | 61.9                                                                            | 63.4                                                              | 1.5      |
| 10         |                                                                                 |                                                                   |          | 194.5                                                                           | 195.4                                                             | 0.9      |
| 11         |                                                                                 |                                                                   |          | 119.4                                                                           | 120.6                                                             | 1.2      |
| 12         |                                                                                 |                                                                   |          | 161.9                                                                           | 163.4                                                             | 1.5      |
| 13         | 6.78, d (8.4)                                                                   | 6.81, d (8.4)                                                     | 0.03     | 115.4                                                                           | 116.6                                                             | 1.2      |
| 14         | 7.26, t (8.4)                                                                   | 7.31, t (7.9)                                                     | 0.05     | 134.1                                                                           | 135.5                                                             | 1.4      |
| 15         | 6.74, d (7.6)                                                                   | 6.79, d (7.6)                                                     | 0.05     | 124.3                                                                           | 125.5                                                             | 1.2      |
| 16         |                                                                                 |                                                                   |          | 141.6                                                                           | 142.6                                                             | 1.0      |
| 17         | 2.60, s                                                                         | 2.55, s                                                           | 0.05     | 22.6                                                                            | 22.8                                                              | 0.2      |



**Table S2. Isoelaecarpine (2)**

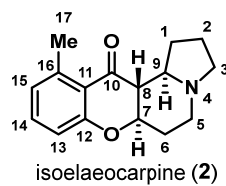

| No.        | $\delta_{\text{H}}$ (isolated)<br>(400 MHz,<br>Methanol- $d_4$ ) <sup>[5]</sup> | $\delta_{\text{H}}$ (synthetic)<br>(400 MHz,<br>Methanol- $d_4$ ) | $\Delta$ | $\delta_{\text{C}}$ (isolated)<br>(100 MHz,<br>Methanol- $d_4$ ) <sup>[5]</sup> | $\delta_{\text{C}}$ (synthetic)<br>(101 MHz,<br>Methanol- $d_4$ ) | $\Delta$ |
|------------|---------------------------------------------------------------------------------|-------------------------------------------------------------------|----------|---------------------------------------------------------------------------------|-------------------------------------------------------------------|----------|
| 1 $\alpha$ | 1.63, m                                                                         | 1.75 – 1.60, m                                                    |          | 30.8                                                                            | 30.5                                                              | -0.3     |
| 1 $\beta$  | 2.17, m                                                                         | 2.17 – 2.10, m                                                    |          |                                                                                 |                                                                   |          |
| 2          | 1.73, m                                                                         | 1.75 – 1.60, m                                                    |          | 21.5                                                                            | 21.2                                                              | -0.3     |
|            |                                                                                 |                                                                   |          |                                                                                 |                                                                   |          |
| 3          | 3.07, dd (11.5, 5)                                                              | 3.03, dd (11.2,<br>4.4)                                           | -0.04    | 55.2                                                                            | 55.1                                                              | -0.1     |
|            | 2.22, m                                                                         | 2.23 – 2.17, m                                                    |          |                                                                                 |                                                                   |          |
| 5 $\alpha$ | 3.15, t (8.0)                                                                   | 3.08, t (9.0)                                                     | -0.07    | 54.6                                                                            | 54.5                                                              | -0.1     |
| 5 $\beta$  | 2.33, m                                                                         | 2.33 – 2.25, m                                                    |          |                                                                                 |                                                                   |          |
| 6          | 2.02, m                                                                         | 2.01 – 1.90, m                                                    |          | 29.3                                                                            | 29.2                                                              | -0.1     |
|            | 1.87, m                                                                         | 1.85 – 1.75, m                                                    |          |                                                                                 |                                                                   |          |
| 7          | 4.66, d (2.5)                                                                   | 4.65, s                                                           | -0.01    | 74.9                                                                            | 75.0                                                              | 0.1      |
| 8          | 2.48 d (10.0)                                                                   | 2.39 d (11.0)                                                     | -0.09    | 47.9                                                                            | 48.0                                                              | 0.1      |
| 9          | 2.63, m                                                                         | 2.63 – 2.54, m                                                    |          | 59.9                                                                            | 60.2                                                              | 0.3      |
| 10         |                                                                                 |                                                                   |          | 195.5                                                                           | 195.9                                                             | 0.4      |
| 11         |                                                                                 |                                                                   |          | 119.5                                                                           | 119.4                                                             | -0.1     |
| 12         |                                                                                 |                                                                   |          | 163.3                                                                           | 163.8                                                             | 0.5      |
| 13         | 6.85, d (8.5)                                                                   | 6.86, d (8.3)                                                     | 0.01     | 116.8                                                                           | 117.0                                                             | 0.2      |
| 14         | 7.32, t (7.5)                                                                   | 7.35, t (7.8)                                                     | 0.03     | 135.6                                                                           | 136.2                                                             | 0.6      |
| 15         | 6.80, d (7.0)                                                                   | 6.81, d (7.3)                                                     | 0.01     | 125.7                                                                           | 125.8                                                             | 0.1      |
| 16         |                                                                                 |                                                                   |          | 143.5                                                                           | 143.3                                                             | -0.2     |
| 17         | 2.63, s                                                                         | 2.57, s                                                           | -0.06    | 23.8                                                                            | 23.1                                                              | -0.7     |

**Table S3. Oxolaecarpine (3)**

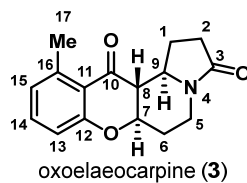

| No.        | $\delta_{\text{H}}$ (isolated)<br>(500 MHz,<br>Methanol- $d_4$ ) <sup>[6]</sup> | $\delta_{\text{H}}$ (synthetic)<br>(400 MHz,<br>Methanol- $d_4$ ) | $\Delta$ | $\delta_{\text{C}}$ (isolated)<br>(126 MHz,<br>Methanol- $d_4$ ) <sup>[6]</sup> | $\delta_{\text{C}}$ (synthetic)<br>(101 MHz,<br>Methanol- $d_4$ ) | $\Delta$ |
|------------|---------------------------------------------------------------------------------|-------------------------------------------------------------------|----------|---------------------------------------------------------------------------------|-------------------------------------------------------------------|----------|
| 1 $\alpha$ | 2.68, m                                                                         | 2.73 – 2.63, m                                                    |          | 26.3                                                                            | 26.3                                                              | 0.0      |
| 1 $\beta$  | 1.92, m                                                                         | 2.02 – 1.90, m                                                    |          |                                                                                 |                                                                   |          |
| 2          | 2.42, m                                                                         | 2.52 – 2.35, m                                                    |          | 31.4                                                                            | 31.4                                                              | 0.0      |
| 3          |                                                                                 |                                                                   |          | 176.3                                                                           | 176.3                                                             | 0.0      |
| 5 $\alpha$ | 2.81, br dd (13.6,<br>13.6)                                                     | 2.82, t (13.0)                                                    | 0.01     | 37.8                                                                            | 37.8                                                              | 0.0      |
| 5 $\beta$  | 4.16, ddd (13.6,<br>5.2, 1.9)                                                   | 4.17, dd (13.5,<br>3.8)                                           | 0.01     |                                                                                 |                                                                   |          |
| 6 $\alpha$ | 2.24, m                                                                         | 2.25, d (12.4)                                                    | 0.01     | 31.5                                                                            | 31.5                                                              | 0.0      |
| 6 $\beta$  | 1.82, m                                                                         | 1.89 – 1.76, m                                                    |          |                                                                                 |                                                                   |          |
| 7          | 4.40, ddd (12.8,<br>11.2, 4.4)                                                  | 4.41, td (12.5,<br>4.4)                                           | 0.01     | 78.6                                                                            | 78.6                                                              | 0.0      |
| 8          | 2.67, dd (12.8,<br>10.0)                                                        | 2.67, dd (12.8,<br>10.4)                                          | 0.00     | 56.1                                                                            | 56.1                                                              | 0.0      |
| 9          | 3.78, ddd (10.0,<br>7.0, 7.0)                                                   | 3.78, dt (10.1,<br>7.3)                                           | 0.00     | 56.9                                                                            | 56.9                                                              | 0.0      |
| 10         |                                                                                 |                                                                   |          | 194.8                                                                           | 194.8                                                             | 0.0      |
| 11         |                                                                                 |                                                                   |          | 120.5                                                                           | 120.5                                                             | 0.0      |
| 12         |                                                                                 |                                                                   |          | 163.3                                                                           | 163.3                                                             | 0.0      |
| 13         | 6.83, br d (8.1)                                                                | 6.84, d (7.9)                                                     | 0.01     | 116.7                                                                           | 116.7                                                             | 0.0      |
| 14         | 7.34, dd (8.1 7.7)                                                              | 7.35, t (7.9)                                                     | 0.01     | 135.9                                                                           | 135.9                                                             | 0.0      |
| 15         | 6.82, br d (7.7)                                                                | 6.82, d (6.9)                                                     | 0.00     | 125.6                                                                           | 125.6                                                             | 0.0      |
| 16         |                                                                                 |                                                                   |          | 142.7                                                                           | 142.7                                                             | 0.0      |
| 17         | 2.57, s                                                                         | 2.58, s                                                           | 0.01     | 22.7                                                                            | 22.7                                                              | 0.0      |

**Table S4. Oxisoelaecarpine (4)**

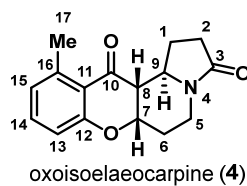

| No.        | $\delta_{\text{H}}$ (isolated)<br>(400 MHz,<br>Methanol- $d_4$ ) <sup>[7]</sup> | $\delta_{\text{H}}$ (synthetic)<br>(400 MHz,<br>Methanol- $d_4$ ) | $\Delta$ | $\delta_{\text{C}}$ (isolated)<br>(100 MHz,<br>Methanol- $d_4$ ) <sup>[7]</sup> | $\delta_{\text{C}}$ (synthetic)<br>(101 MHz,<br>Methanol- $d_4$ ) | $\Delta$ |
|------------|---------------------------------------------------------------------------------|-------------------------------------------------------------------|----------|---------------------------------------------------------------------------------|-------------------------------------------------------------------|----------|
| 1          | 2.13-1.99, m                                                                    | 2.10-1.99, m                                                      |          | 23.4                                                                            | 23.3                                                              | -0.1     |
| 2          | 2.44-2.31, m                                                                    | 2.42-2.29, m                                                      |          | 30.9                                                                            | 30.7                                                              | -0.2     |
| 3          |                                                                                 |                                                                   |          | 176.5                                                                           | 176.3                                                             | -0.2     |
| 5 $\beta$  | 4.03, dd<br>(13.3,5.7)                                                          | 4.01, dd<br>(13.4,5.8)                                            | -0.02    | 35.8                                                                            | 35.6                                                              | -0.2     |
| 5 $\alpha$ | 3.22, dd (13.3,<br>10.3)                                                        | 3.19, t (12.0)                                                    | -0.03    |                                                                                 |                                                                   |          |
| 6 $\alpha$ | 2.18, d (14.6)                                                                  | 2.17, d (14.6)                                                    | -0.01    | 29.3                                                                            | 29.1                                                              | -0.2     |
| 6 $\beta$  | 1.88-1.74, m                                                                    | 1.86-1.74, m                                                      |          |                                                                                 |                                                                   |          |
| 7          | 4.77, d (2.4)                                                                   | 4.75, d (3.1)                                                     | -0.02    | 75.3                                                                            | 75.1                                                              | -0.2     |
| 8          | 2.47, dd (11.0,<br>2.4)                                                         | 2.45, br d<br>(11.5)                                              | -0.02    | 55.4                                                                            | 55.2                                                              | -0.2     |
| 9          | 3.83, dt (11.0,<br>6.9)                                                         | 3.79, dt (11.2,<br>6.9)                                           | -0.04    | 54.7                                                                            | 54.5                                                              | -0.2     |
| 10         |                                                                                 |                                                                   |          | 195.1                                                                           | 194.9                                                             | -0.2     |
| 11         |                                                                                 |                                                                   |          | 119.4                                                                           | 119.2                                                             | -0.2     |
| 12         |                                                                                 |                                                                   |          | 164.2                                                                           | 163.9                                                             | -0.3     |
| 13         | 6.94, d (7.9)                                                                   | 6.92, d (8.4)                                                     | -0.02    | 117.3                                                                           | 117.1                                                             | -0.2     |
| 14         | 7.40, t (7.9)                                                                   | 7.39, t (7.9)                                                     | -0.01    | 136.6                                                                           | 136.4                                                             | -0.2     |
| 15         | 6.87, d (7.9)                                                                   | 6.86, d (7.5)                                                     | -0.01    | 126.3                                                                           | 126.1                                                             | -0.2     |
| 16         |                                                                                 |                                                                   |          | 143.8                                                                           | 143.7                                                             | -0.1     |
| 17         | 2.60, s                                                                         | 2.59, s                                                           | -0.01    | 23.3                                                                            | 23.1                                                              | -0.2     |

**Table S5. Elaeocarfoline A (6)**

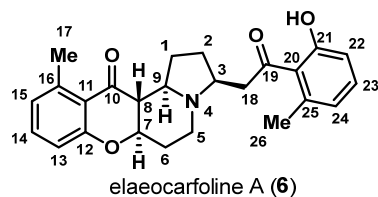

| No.        | $\delta_{\text{H}}$ (isolated)<br>(800 MHz,<br>Acetone- $d_6$ ) <sup>[6]</sup> | $\delta_{\text{H}}$ (synthetic)<br>(500 MHz,<br>Acetone- $d_6$ ) | $\Delta$ | $\delta_{\text{C}}$ (isolated)<br>(201 MHz,<br>Acetone- $d_6$ ) <sup>[6]</sup> | $\delta_{\text{C}}$ (synthetic)<br>(126 MHz,<br>Acetone- $d_6$ ) | $\Delta$ |
|------------|--------------------------------------------------------------------------------|------------------------------------------------------------------|----------|--------------------------------------------------------------------------------|------------------------------------------------------------------|----------|
| 1          | 2.48, m                                                                        | 2.49 – 2.43, m                                                   |          | 29.5                                                                           | 29.5                                                             | 0.0      |
|            | 1.50, m                                                                        | 1.55 – 1.45, m                                                   |          |                                                                                |                                                                  |          |
| 2 $\alpha$ | 2.09, m                                                                        | 2.14 – 2.07, m                                                   |          | 30.5                                                                           | 30.5                                                             | 0.0      |
| 2 $\beta$  | 1.60, m                                                                        | 1.65 – 1.55, m                                                   |          |                                                                                |                                                                  |          |
| 3          | 2.81, m                                                                        | 2.84 – 2.78, m                                                   |          | 59.9                                                                           | 60.0                                                             | 0.1      |
| 5 $\alpha$ | 2.12, m                                                                        | 2.14 – 2.07, m                                                   |          | 47.7                                                                           | 47.8                                                             | 0.1      |
| 5 $\beta$  | 3.20, m                                                                        | 3.22 – 3.17, m                                                   |          |                                                                                |                                                                  |          |
| 6 $\alpha$ | 2.18, m                                                                        | 2.19 – 2.14, m                                                   |          | 32.3                                                                           | 32.3                                                             | 0.0      |
| 6 $\beta$  | 1.92, qd (11.9<br>4.7)                                                         | 1.92, qd (11.9 4.4)                                              | 0.00     |                                                                                |                                                                  |          |
| 7          | 4.22, ddd (11.9<br>11.1 5.0)                                                   | 4.20, ddd (12.6<br>11.1 5.0)                                     | -0.02    | 79.5                                                                           | 79.5                                                             | 0.0      |
| 8          | 2.54, dd (11.1<br>9.8)                                                         | 2.52, dd (12.7 9.6)                                              | -0.02    | 55.3                                                                           | 55.3                                                             | 0.0      |
| 9          | 2.22, ddd (11.1<br>9.8 6.0)                                                    | 2.24 – 2.19, m                                                   |          | 63.4                                                                           | 63.4                                                             | 0.0      |
| 10         |                                                                                |                                                                  |          | 194.8                                                                          | 194.8                                                            | 0.0      |
| 11         |                                                                                |                                                                  |          | 120.5                                                                          | 120.5                                                            | 0.0      |
| 12         |                                                                                |                                                                  |          | 162.8                                                                          | 162.9                                                            | 0.1      |
| 13         | 6.84, br d (8.2)                                                               | 6.82, d (8.0)                                                    | -0.02    | 116.3                                                                          | 116.3                                                            | 0.0      |
| 14         | 7.36, dd (8.2 7.5)                                                             | 7.34, t (7.9)                                                    | -0.02    | 135.0                                                                          | 135.0                                                            | 0.0      |
| 15         | 6.83, br d (7.5)                                                               | 6.81, d (7.2)                                                    | -0.02    | 125.0                                                                          | 125.0                                                            | 0.0      |
| 16         |                                                                                |                                                                  |          | 141.9                                                                          | 142.0                                                            | 0.1      |
| 17         | 2.56, s                                                                        | 2.54, s                                                          | -0.02    | 22.5                                                                           | 22.6                                                             | 0.1      |
| 18         | 3.29, dd (16.3,<br>3.8)                                                        | 3.28, dd (16.2,<br>3.8)                                          | -0.01    | 49.5                                                                           | 49.5                                                             | 0.0      |
|            | 2.93, dd (16.3<br>8.2)                                                         | 2.92, dd (16.2 8.3)                                              | -0.01    |                                                                                |                                                                  |          |
| 19         |                                                                                |                                                                  |          | 206.8                                                                          | 206.8                                                            | 0.0      |
| 20         |                                                                                |                                                                  |          | 130.0                                                                          | 130.0                                                            | 0.0      |
| 21         |                                                                                | 9.40, s                                                          |          | 155.8                                                                          | 155.9                                                            | 0.1      |
| 22         | 6.78, br d (8.1)                                                               | 6.77, d (8.2)                                                    | -0.01    | 114.7                                                                          | 114.8                                                            | 0.1      |
| 23         | 7.14, dd (8.1 7.6)                                                             | 7.13, t (7.9)                                                    | -0.01    | 131.3                                                                          | 131.3                                                            | 0.0      |
| 24         | 6.74, br d (7.6)                                                               | 6.73, d (7.6)                                                    | -0.01    | 122.8                                                                          | 122.8                                                            | 0.0      |
| 25         |                                                                                |                                                                  |          | 137.2                                                                          | 137.2                                                            | 0.0      |
| 26         | 2.27, s                                                                        | 2.26, s                                                          | -0.01    | 20.0                                                                           | 20.1                                                             | 0.1      |

**Table S6. Elaeocarfoline B (7)**

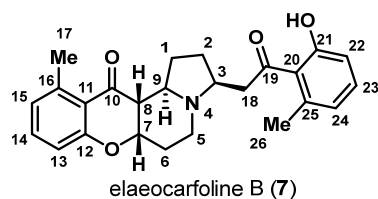

| No.        | $\delta_{\text{H}}$ (isolated)<br>(500 MHz,<br>Acetone- $d_6$ ) <sup>[6]</sup> | $\delta_{\text{H}}$ (synthetic)<br>(400 MHz,<br>Acetone- $d_6$ ) | $\Delta$ | $\delta_{\text{C}}$ (isolated)<br>(201 MHz,<br>Acetone- $d_6$ ) <sup>[6]</sup> | $\delta_{\text{C}}$ (synthetic)<br>(126 MHz,<br>Acetone- $d_6$ ) | $\Delta$ |
|------------|--------------------------------------------------------------------------------|------------------------------------------------------------------|----------|--------------------------------------------------------------------------------|------------------------------------------------------------------|----------|
| 1          | 1.54, m                                                                        | 1.60 – 1.51, m                                                   |          | 28.1                                                                           | 28.1                                                             | 0.0      |
| 2 $\alpha$ | 1.93, m                                                                        | 1.97 – 1.90, m                                                   |          | 29.0                                                                           | 29.1                                                             | 0.1      |
| 2 $\beta$  | 1.51, m                                                                        | 1.60 – 1.51, m                                                   |          |                                                                                |                                                                  |          |
| 3          | 2.80, m                                                                        | 2.84 – 2.78, m                                                   |          | 61.3                                                                           | 61.4                                                             | 0.1      |
| 5 $\alpha$ | 2.42, ddd (12.0,<br>11.1, 2.8)                                                 | 2.43, td (12.0, 11.3,<br>2.8)                                    | 0.01     | 46.2                                                                           | 46.3                                                             | 0.1      |
| 5 $\beta$  | 3.03, ddd (11.1,<br>5.0, 2.1)                                                  | 3.04, ddd (11.0, 5.2,<br>2.0)                                    | 0.01     |                                                                                |                                                                  |          |
| 6 $\alpha$ | 2.07, m                                                                        | 2.11 – 2.06, m                                                   |          | 30.8                                                                           | 30.8                                                             | 0.0      |
| 6 $\beta$  | 1.84, m                                                                        | 1.90 – 1.81, m                                                   |          |                                                                                |                                                                  |          |
| 7          | 4.68, q like (2.7)                                                             | 4.69, q like (2.3)                                               | 0.01     | 74.7                                                                           | 74.8                                                             | 0.1      |
| 8          | 2.34, m                                                                        | 2.36 – 2.31, m                                                   |          | 55.4                                                                           | 55.5                                                             | 0.1      |
| 9          | 2.36, m                                                                        | 2.36 – 2.31, m                                                   |          | 60.2                                                                           | 60.3                                                             | 0.1      |
| 10         |                                                                                |                                                                  |          | 194.7                                                                          | 194.7                                                            | 0.0      |
| 11         |                                                                                |                                                                  |          | 119.2                                                                          | 119.3                                                            | 0.1      |
| 12         |                                                                                |                                                                  |          | 163.2                                                                          | 163.3                                                            | 0.1      |
| 13         | 6.86, br d (8.4)                                                               | 6.87, d (8.3)                                                    | 0.01     | 116.7                                                                          | 116.7                                                            | 0.0      |
| 14         | 7.37 <sup>a</sup> , dd (8.4 7.4)                                               | 7.37, t (7.9)                                                    | 0.00     | 135.4                                                                          | 135.5                                                            | 0.1      |
| 15         | 6.82, br d (7.4)                                                               | 6.83, d (7.4)                                                    | 0.01     | 125.2                                                                          | 125.3                                                            | 0.1      |
| 16         |                                                                                |                                                                  |          | 142.5                                                                          | 142.6                                                            | 0.1      |
| 17         | 2.55, s                                                                        | 2.56, s                                                          | 0.01     | 22.9                                                                           | 22.9                                                             | 0.0      |
| 18         | 3.28, dd (16.0, 3.9)                                                           | 3.29, dd (16.1, 3.8)                                             | 0.01     | 49.5                                                                           | 49.6                                                             | 0.1      |
|            | 2.90, dd (16.0 8.3)                                                            | 2.91, dd (16.2 8.3)                                              | 0.01     |                                                                                |                                                                  |          |
| 19         |                                                                                |                                                                  |          | 206.8                                                                          | 206.8                                                            | 0.0      |
| 20         |                                                                                |                                                                  |          | 129.9                                                                          | 130.0                                                            | 0.1      |
| 21         |                                                                                |                                                                  |          | 155.9                                                                          | 156.0                                                            | 0.1      |
| 22         | 6.76, br d (8.2)                                                               | 6.76, d (8.2)                                                    | 0.00     | 114.8                                                                          | 114.9                                                            | 0.1      |
| 23         | 7.12, dd (8.2 7.6)                                                             | 7.12, t (7.9)                                                    | 0.00     | 131.3                                                                          | 131.4                                                            | 0.1      |
| 24         | 6.71, br d (7.6)                                                               | 6.71, d (7.4)                                                    | 0.00     | 122.7                                                                          | 122.8                                                            | 0.1      |
| 25         |                                                                                |                                                                  |          | 137.2                                                                          | 137.3                                                            | 0.1      |
| 26         | 2.23, s                                                                        | 2.24, s                                                          | 0.01     | 20.0                                                                           | 20.1                                                             | 0.1      |

<sup>a</sup>This number was corrected according to the spectrum reported in its *Supporting Information*<sup>[6]</sup>.

## X-Ray Crystallographic Data for Compound 18

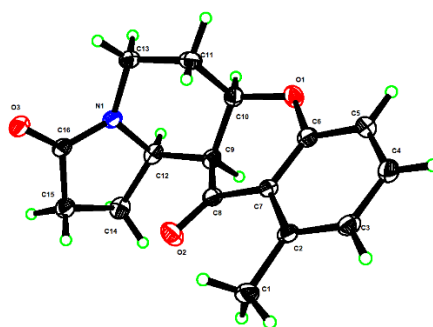

Table 1 Crystal data and structure refinement for **18**.

|                                                              |                                                                              |
|--------------------------------------------------------------|------------------------------------------------------------------------------|
| Identification code                                          | CCDC 2169386                                                                 |
| Empirical formula                                            | C <sub>16</sub> H <sub>17</sub> NO <sub>3</sub>                              |
| Formula weight                                               | 271.30                                                                       |
| Temperature/K                                                | 170.0                                                                        |
| Crystal system                                               | orthorhombic                                                                 |
| Space group                                                  | Pbca                                                                         |
| <i>a</i> /Å                                                  | 11.002(3)                                                                    |
| <i>b</i> /Å                                                  | 9.389(3)                                                                     |
| <i>c</i> /Å                                                  | 25.890(7)                                                                    |
| $\alpha$ /°                                                  | 90                                                                           |
| $\beta$ /°                                                   | 90                                                                           |
| $\gamma$ /°                                                  | 90                                                                           |
| Volume/Å <sup>3</sup>                                        | 2674.2(12)                                                                   |
| <i>Z</i>                                                     | 8                                                                            |
| $\rho_{\text{calc}}$ /cm <sup>3</sup>                        | 1.348                                                                        |
| $\mu$ /mm <sup>-1</sup>                                      | 0.093                                                                        |
| <i>F</i> (000)                                               | 1152.0                                                                       |
| Crystal size/mm <sup>3</sup>                                 | 0.15 × 0.07 × 0.06                                                           |
| Radiation                                                    | MoK $\alpha$ ( $\lambda$ = 0.71073)                                          |
| 2 $\theta$ range for data collection/°                       | 4.86 to 52.76                                                                |
| Index ranges                                                 | -13 ≤ <i>h</i> ≤ 13, -9 ≤ <i>k</i> ≤ 11, -32 ≤ <i>l</i> ≤ 30                 |
| Reflections collected                                        | 18127                                                                        |
| Independent reflections                                      | 2711 [ <i>R</i> <sub>int</sub> = 0.0755, <i>R</i> <sub>sigma</sub> = 0.0471] |
| Data/restraints/parameters                                   | 2711/0/182                                                                   |
| Goodness-of-fit on <i>F</i> <sup>2</sup>                     | 1.028                                                                        |
| Final <i>R</i> indexes [ <i>I</i> ≥ 2 $\sigma$ ( <i>I</i> )] | <i>R</i> <sub>1</sub> = 0.0449, <i>wR</i> <sub>2</sub> = 0.0964              |
| Final <i>R</i> indexes [all data]                            | <i>R</i> <sub>1</sub> = 0.0713, <i>wR</i> <sub>2</sub> = 0.1116              |

Largest diff. peak/hole / e Å<sup>-3</sup> 0.16/-0.22

**Table 2 Fractional Atomic Coordinates (nem<sup>4</sup>) and Equivalent Isotropic Displacement Parameters (Å<sup>2</sup> × a<sup>3</sup>) for 3. U<sub>eq</sub> is defined as 1/3 of of the trace of the orthogonalised U<sub>ij</sub> tensor.**

| Atom | <i>x</i>   | <i>y</i>   | <i>z</i>  | U(eq)   |
|------|------------|------------|-----------|---------|
| O3   | 6403.3(11) | 1899.2(14) | 2976.5(5) | 37.7(3) |
| O1   | 2045.5(11) | 5740.1(14) | 3362.3(5) | 37.3(3) |
| O2   | 4546.4(11) | 3537.7(16) | 4212.8(5) | 45.2(4) |
| N1   | 5498.6(13) | 4084.8(16) | 3052.6(5) | 30.2(4) |
| C7   | 2480.3(15) | 4208.1(19) | 4100.3(6) | 26.7(4) |
| C16  | 6275.0(15) | 3049(2)    | 3196.0(6) | 29.2(4) |
| C6   | 1674.0(15) | 4960(2)    | 3779.4(6) | 30.3(4) |
| C8   | 3802.3(16) | 4301(2)    | 4000.1(6) | 29.6(4) |
| C2   | 1992.2(15) | 3443(2)    | 4527.0(6) | 29.7(4) |
| C9   | 4178.5(15) | 5463.5(19) | 3623.0(7) | 29.9(4) |
| C12  | 5458.0(16) | 5318(2)    | 3394.1(7) | 31.9(4) |
| C3   | 752.0(16)  | 3498(2)    | 4617.0(7) | 33.6(4) |
| C10  | 3267.8(16) | 5515(2)    | 3177.2(7) | 32.2(4) |
| C4   | -20.6(17)  | 4262(2)    | 4295.5(7) | 36.8(5) |
| C5   | 429.8(16)  | 4980(2)    | 3873.3(7) | 35.3(5) |
| C1   | 2771.3(17) | 2589(2)    | 4891.2(7) | 38.2(5) |
| C15  | 6953.7(16) | 3551(2)    | 3667.9(7) | 36.0(5) |
| C11  | 3333.1(17) | 4178(2)    | 2846.4(7) | 35.6(4) |
| C13  | 4617.1(17) | 3978(2)    | 2634.3(7) | 38.0(5) |
| C14  | 6546.9(16) | 5082(2)    | 3758.6(7) | 37.2(5) |

## References

- [1] Taber, D. F., Hoerrner, R. S., Hagen, M. D. A practical preparation of the indolizidine nucleus: synthesis of ( $\pm$ )-elaekanine A. *The Journal of Organic Chemistry*, **1991**, *56*, 1287-1289
- [2] Michael, J. P., Parsons, A. S. Chemoselective reactions of vinylogous amides, and the synthesis of two Peripentadenia alkaloids. *Tetrahedron*, **1996**, *52*, 2199-2216.
- [3] Neto, B. A., Lapis, A. A., Bernd, A. B., Russowsky, D. Studies on the Eschenmoser coupling reaction and insights on its mechanism. Application in the synthesis of Norallosedamine and other alkaloids. *Tetrahedron*, **2009**, *65*, 2484-2496.
- [4] Fischer, M., Harms, K., Koert, U. Total syntheses of 7, 20-oxa-bridged dinorditerpenes: antihepatitis C virus active (+)-elevenol from *Flueggea virosa* and (+)-przewalskin. *Organic letters*, **2016**, *18*, 5692-5695.
- [5] Wang, X. Y. Master's Thesis (2011). Institute of Modern Chinese Medicine (IMCM), College of Pharmaceutical Sciences, Zhejiang University, Hangzhou, P. R. China.
- [6] Hong, W., Zhang, Y., Yang, J., Xia, M. Y., Luo, J. F., Li, X. N., Wang, Y. H., Wang, J. S. Alkaloids from the Branches and Leaves of *Elaeocarpus angustifolius*. *Journal of natural products*, **2019**, *82*, 3221-3226.
- [7] Zhou, C. X., Wang, X. Y., Mo, J. X., Zhang, J., Gan, L. S. Optical resolution and structure determination of new indolizidine alkaloids from *Elaeocarpus sphaericus*. *Helvetica Chimica Acta*, **2011**, *94*, 347-354.



# NMR Spectra

## Compound S1 <sup>1</sup>H NMR (400 MHz, Chloroform-d)

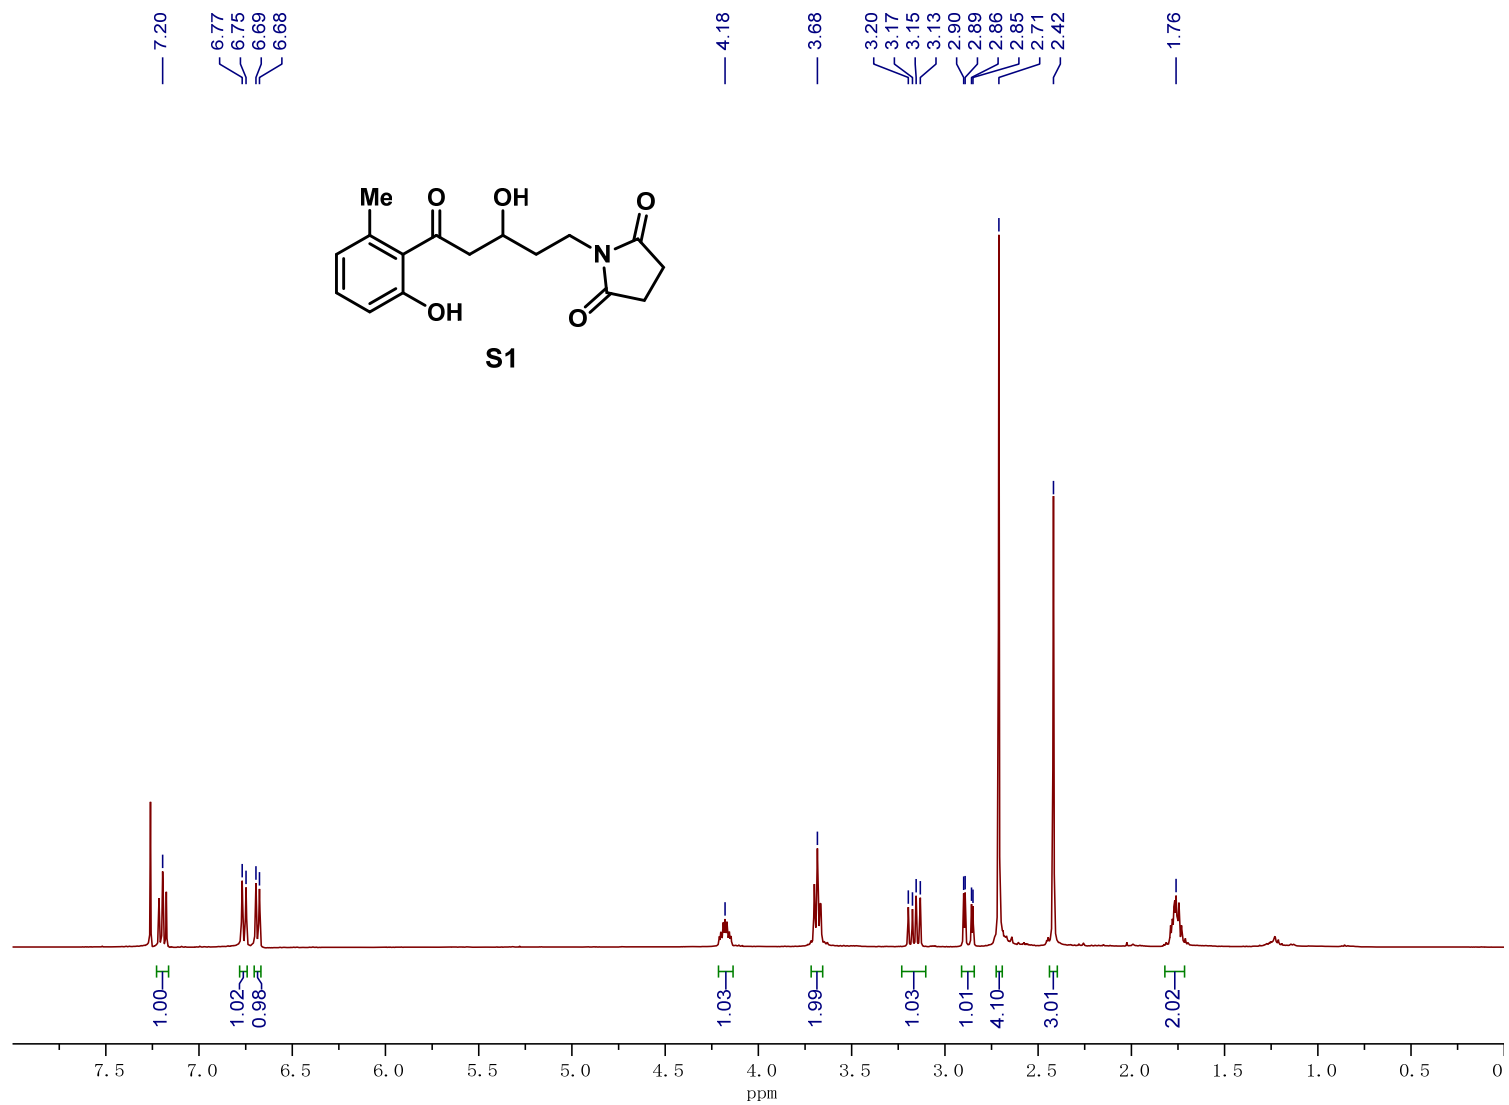

Compound S1 <sup>13</sup>C NMR (101 MHz, Chloroform-*d*)

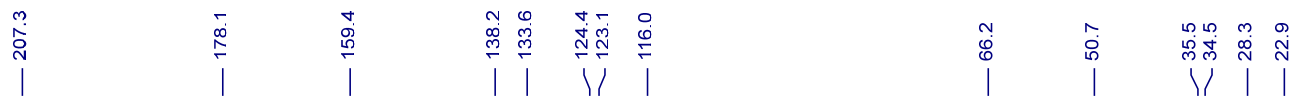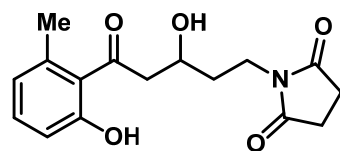

S1

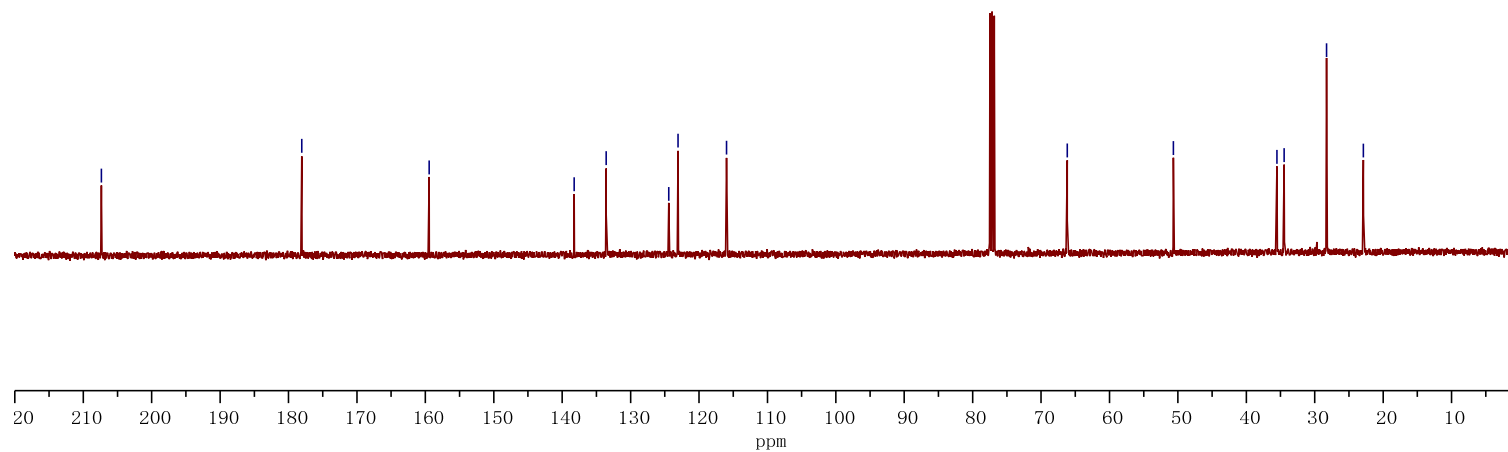

Compound 13 <sup>1</sup>H NMR (400 MHz, Chloroform-*d*)

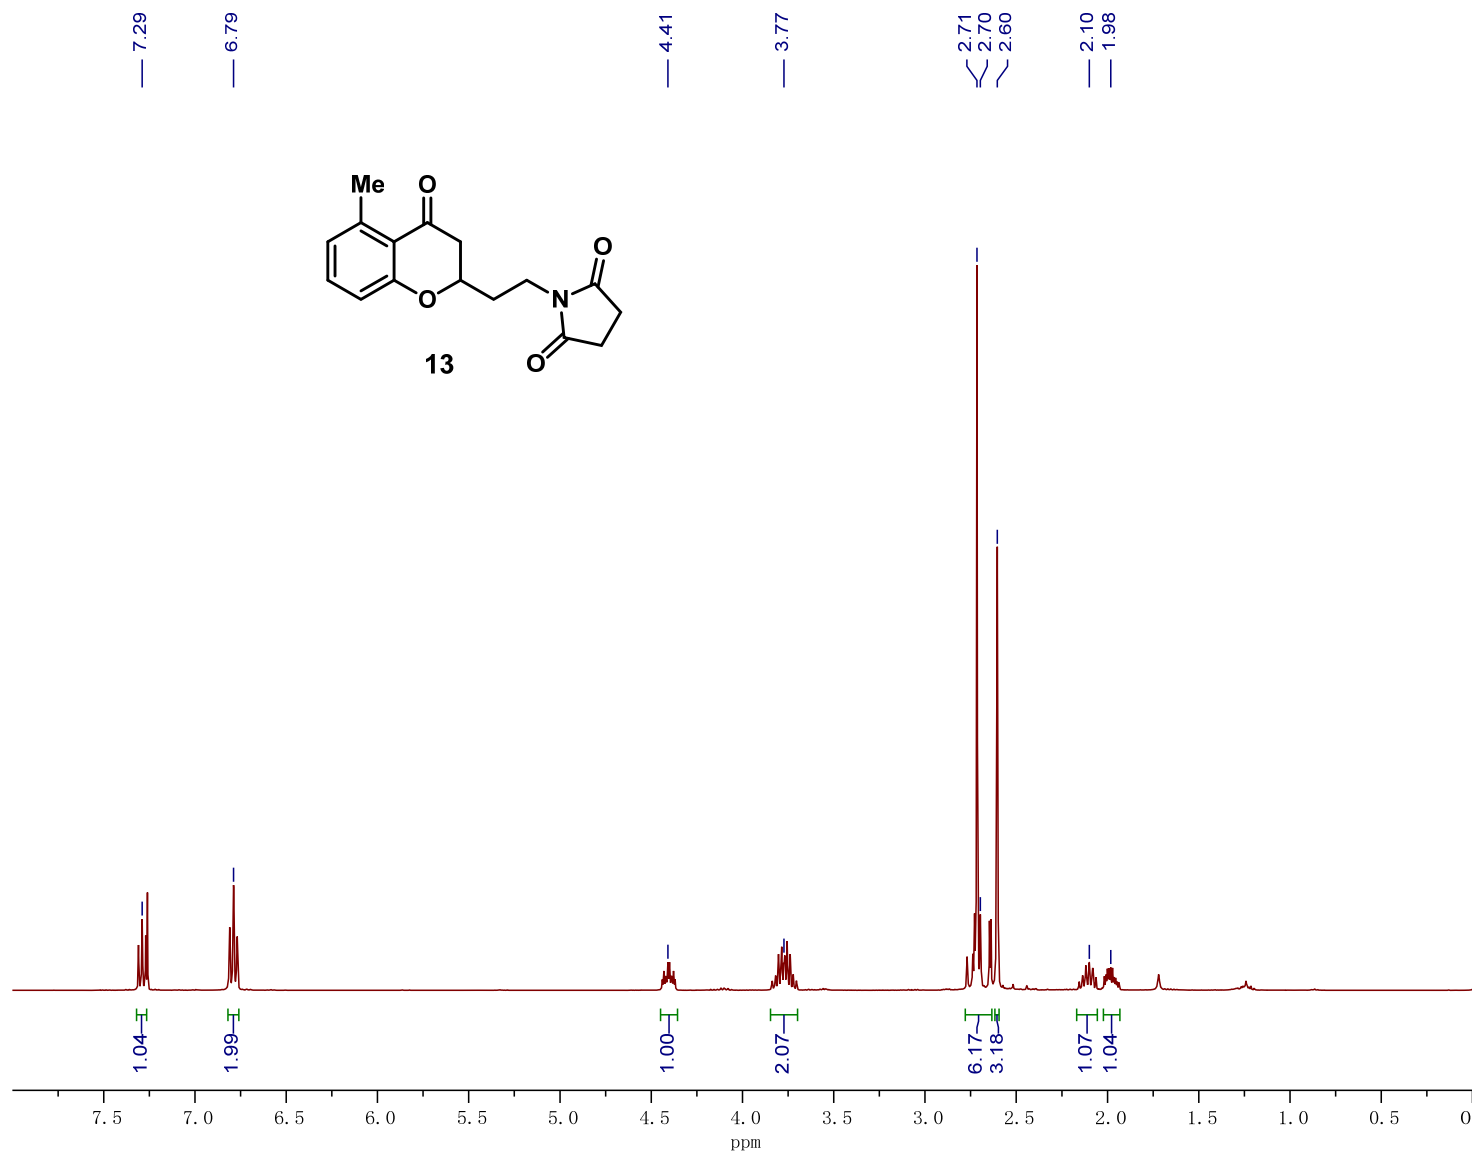

Compound 13 <sup>13</sup>C NMR (101 MHz, Chloroform-*d*)

193.0  
177.0  
162.1  
141.7  
134.4  
124.5  
119.3  
115.6  
74.9  
43.9  
34.9  
32.3  
28.0  
22.6

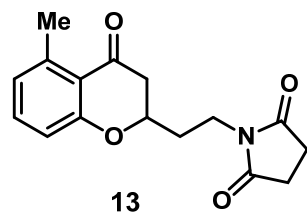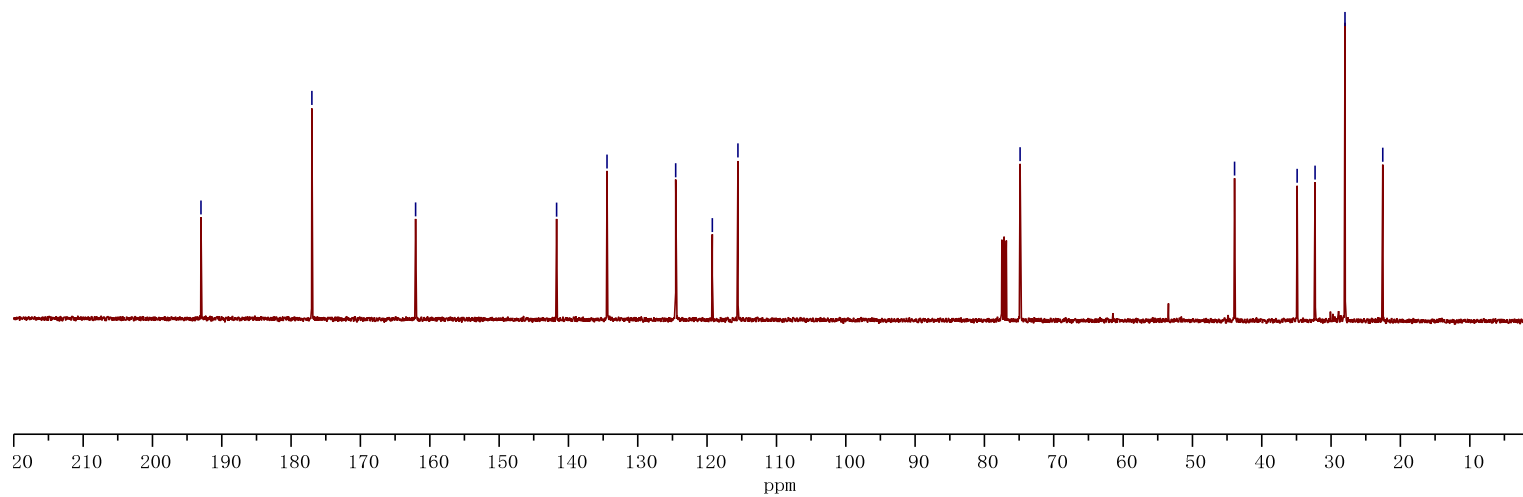

Compound S2 <sup>1</sup>H NMR (500 MHz, Chloroform-*d*)

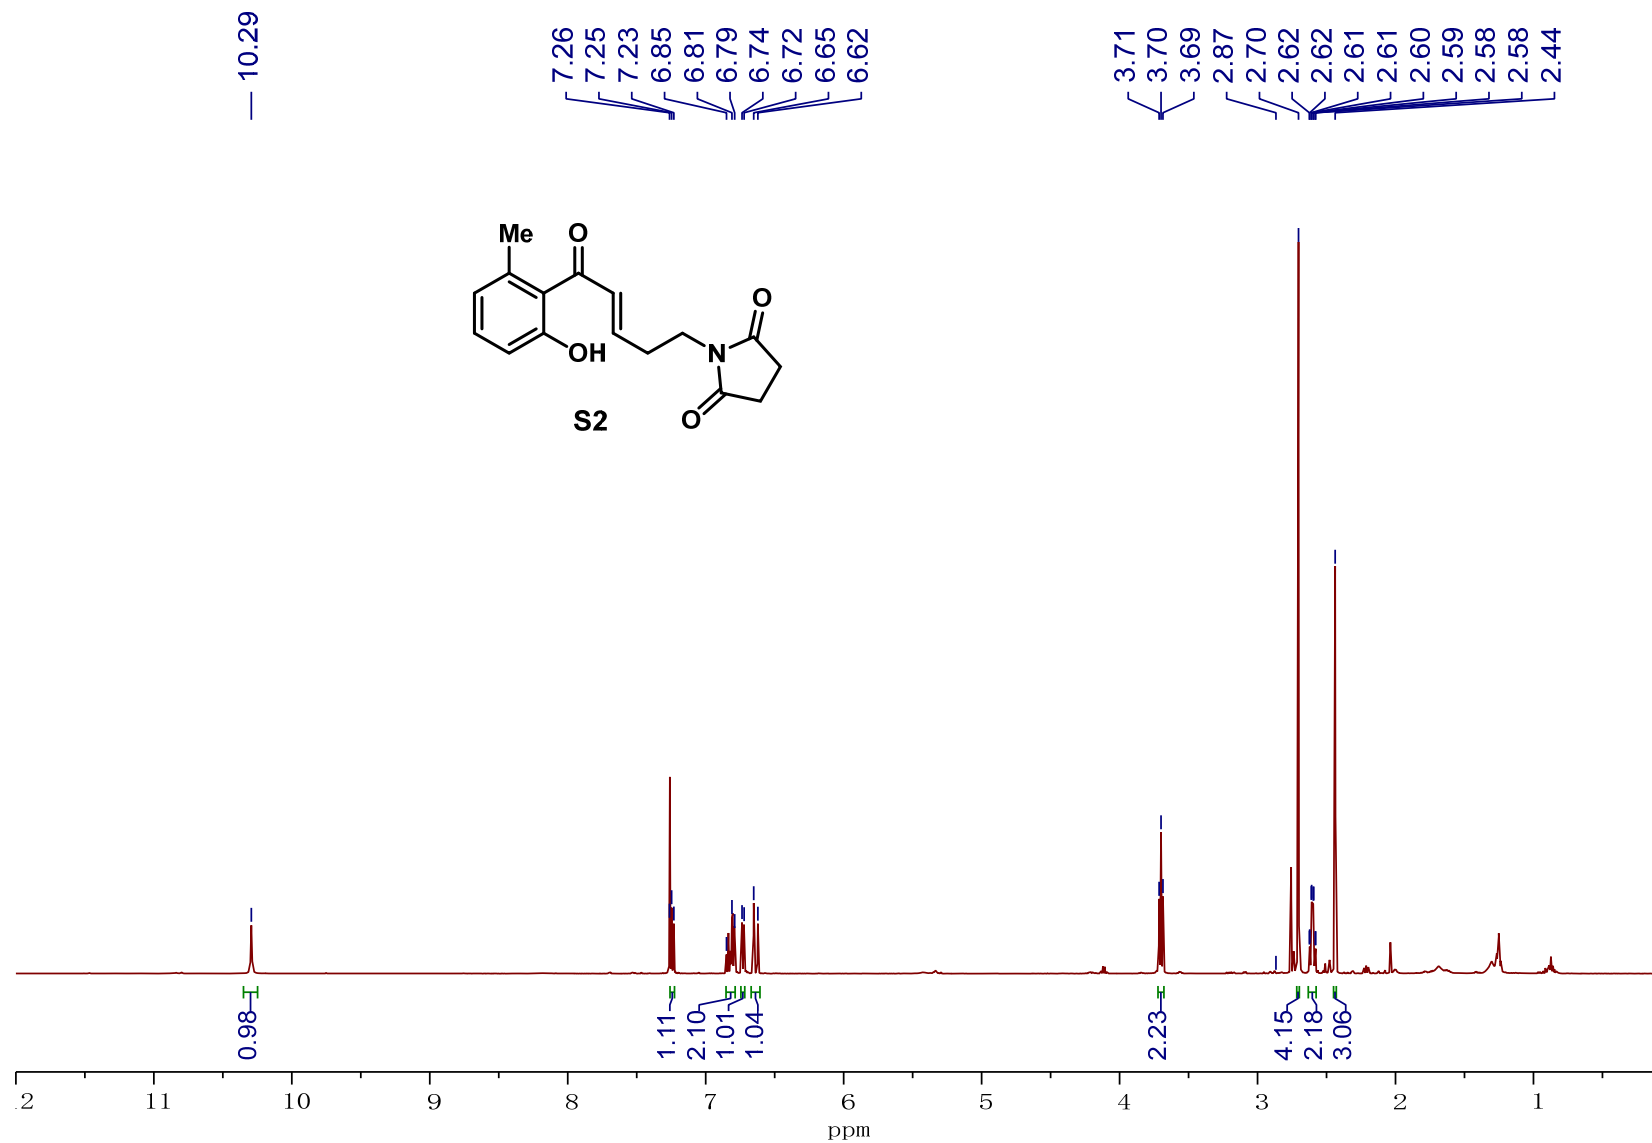

Compound S2 <sup>13</sup>C NMR (126 MHz, Chloroform-*d*)

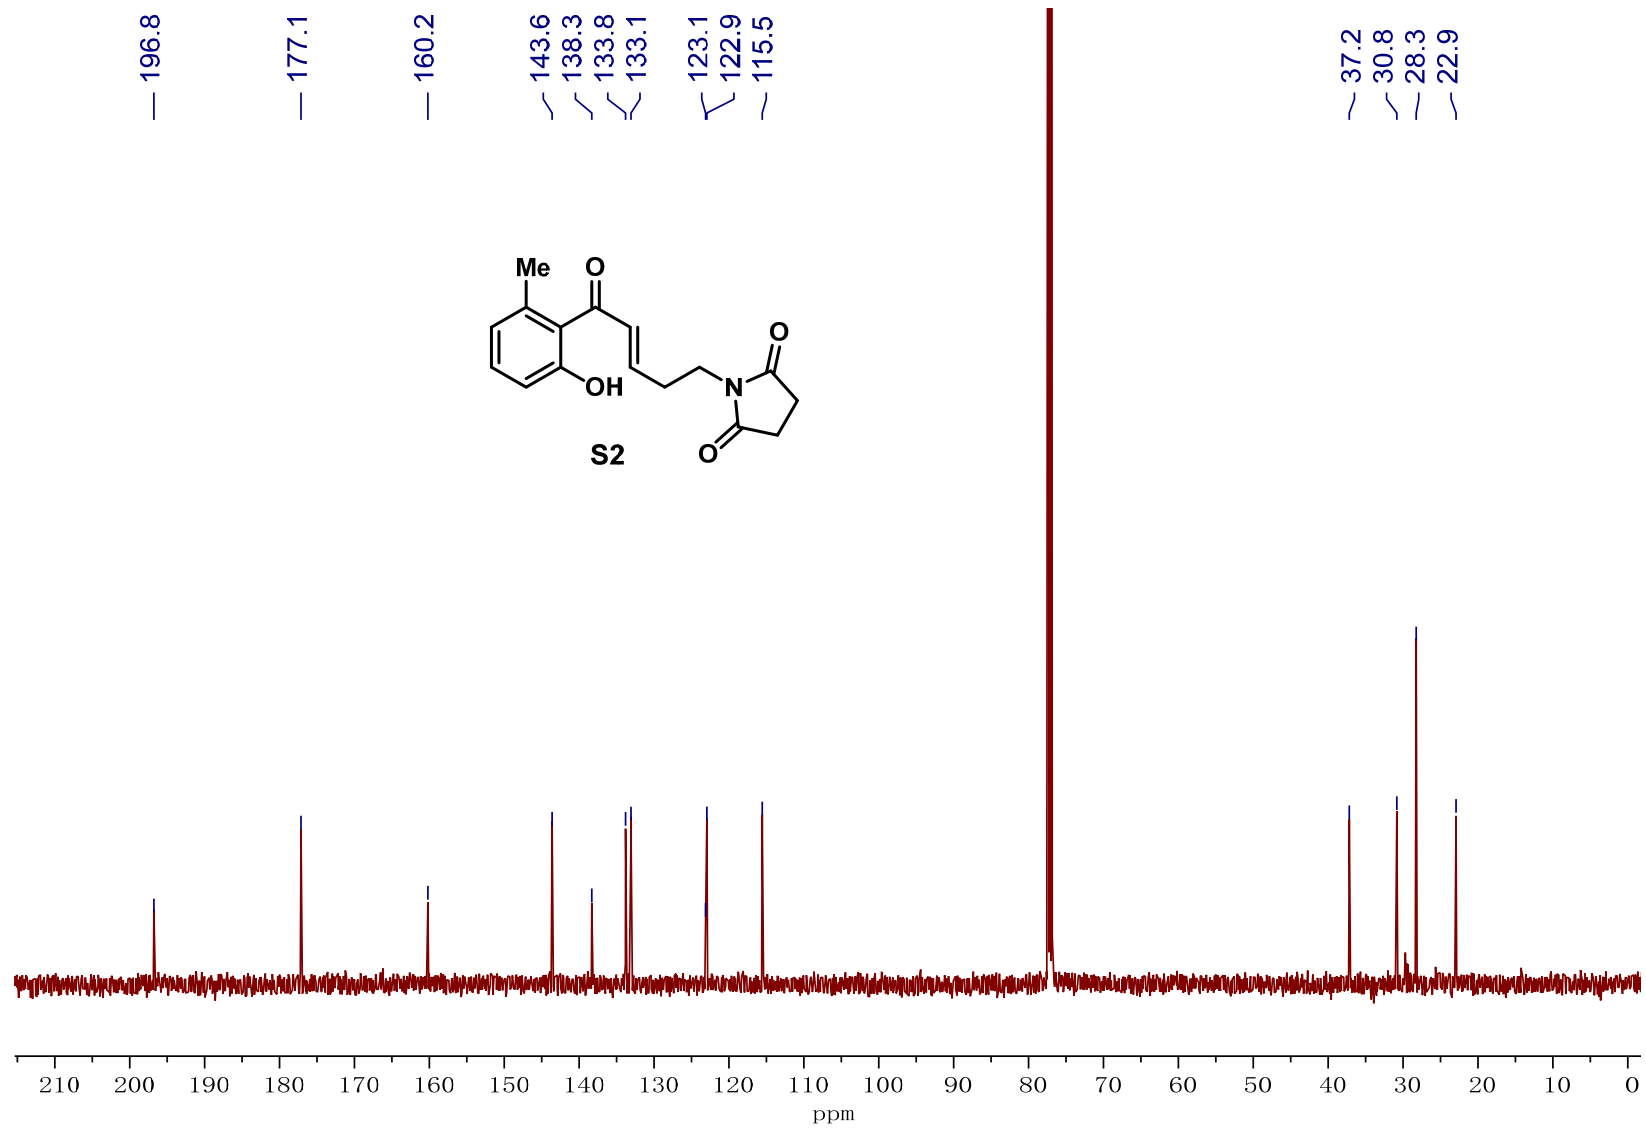

Compound 14a <sup>1</sup>H NMR (400 MHz, Chloroform-*d*)

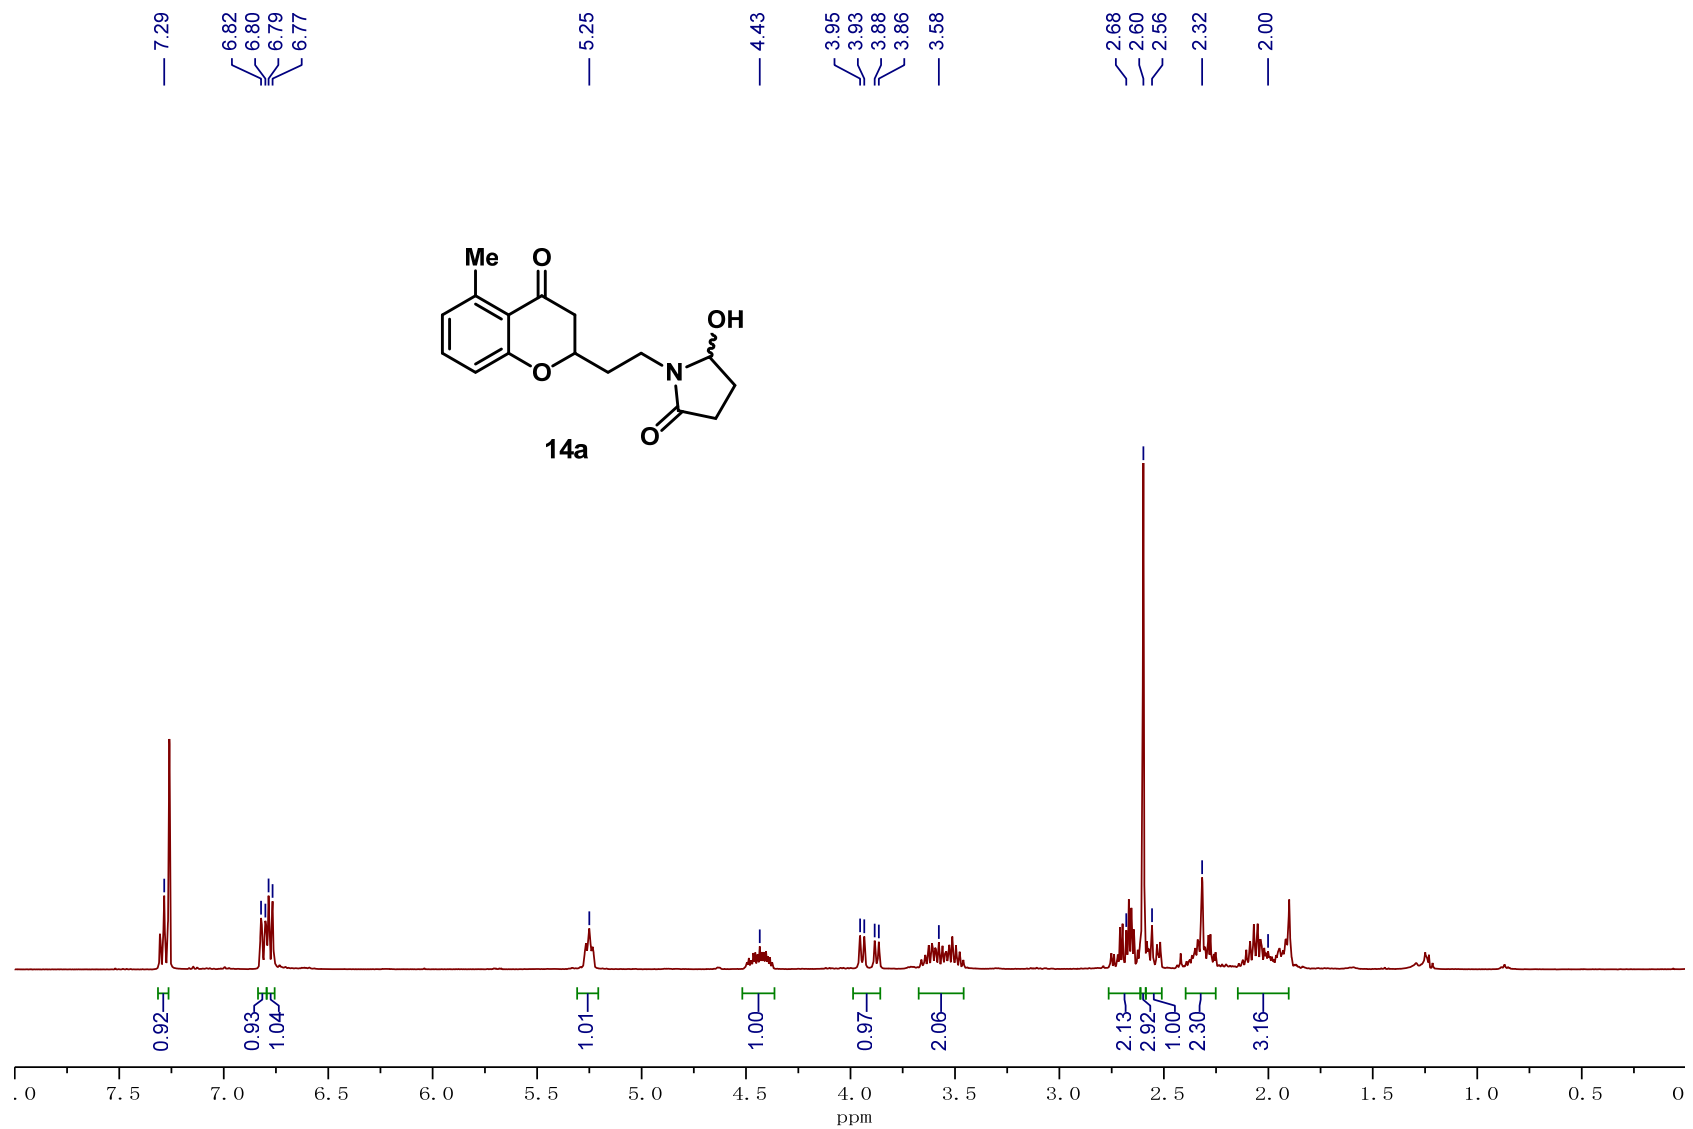

Compound 14a <sup>13</sup>C NMR (101 MHz, Chloroform-*d*)

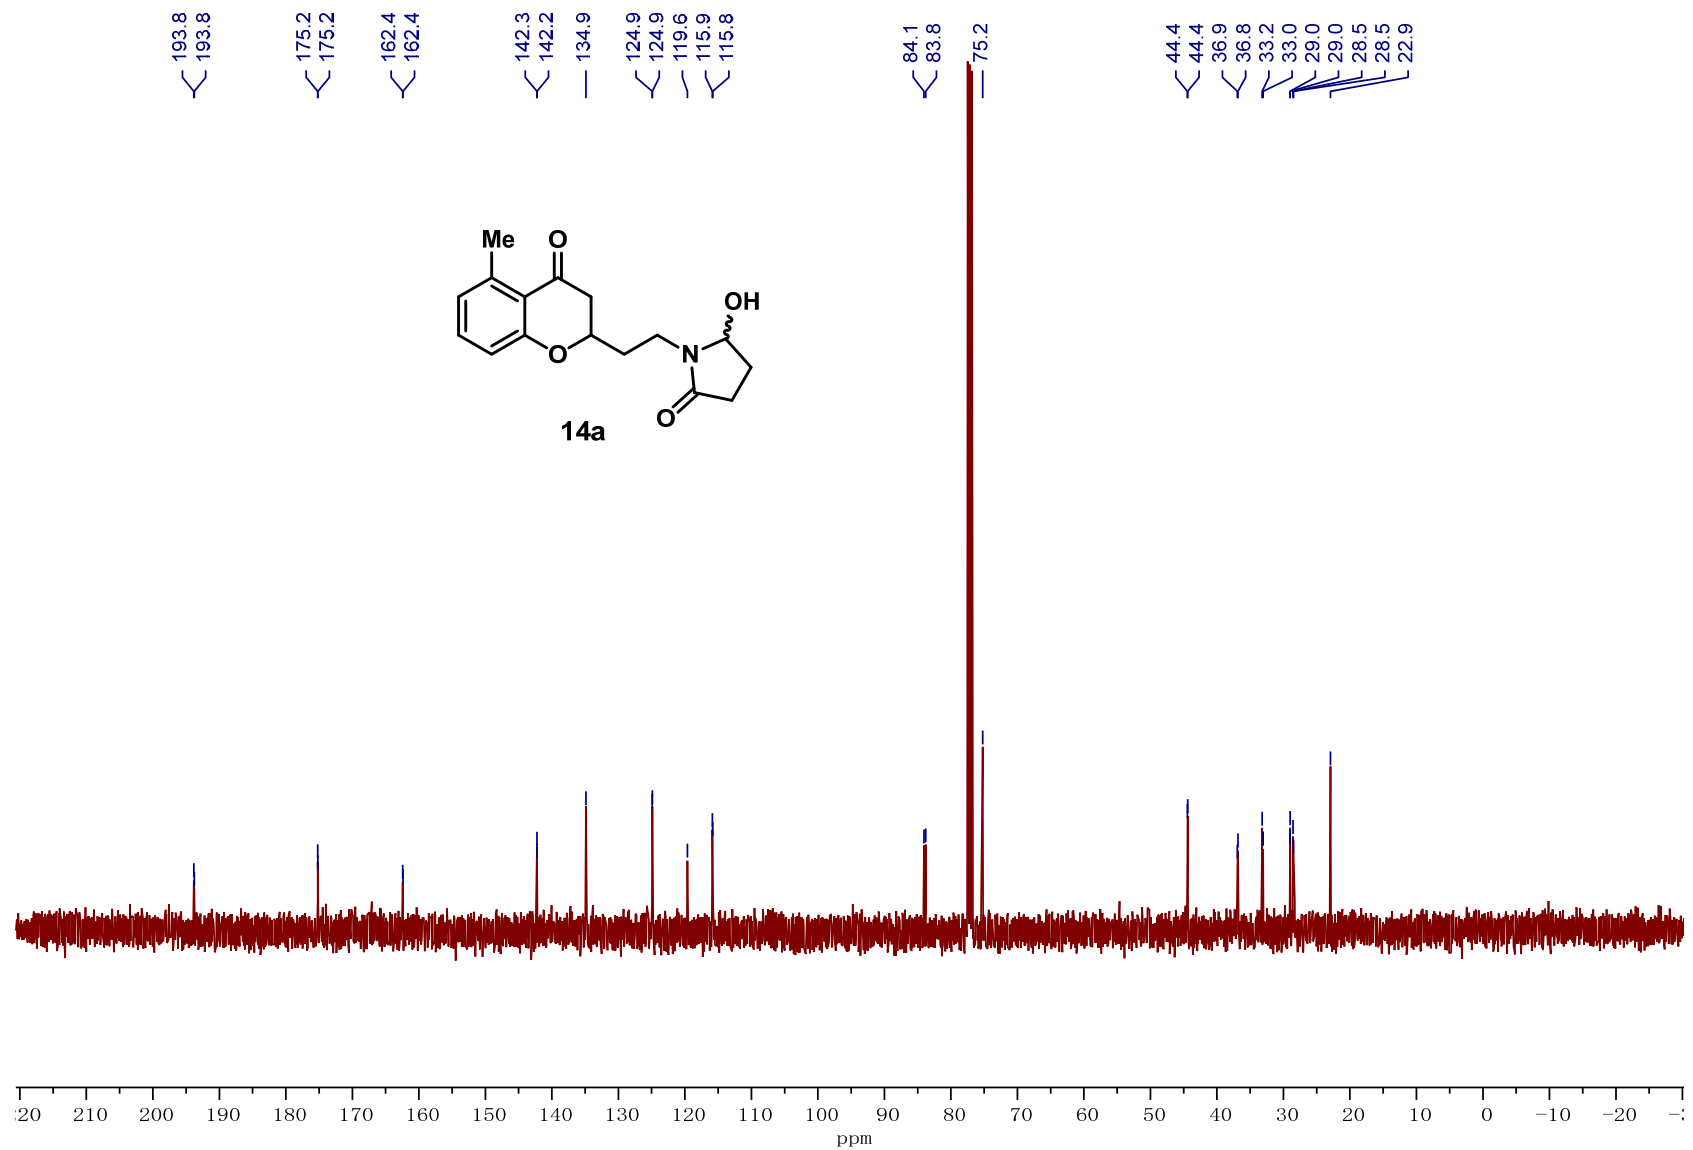



Compound 14b <sup>1</sup>H NMR (400 MHz, Chloroform-*d*)

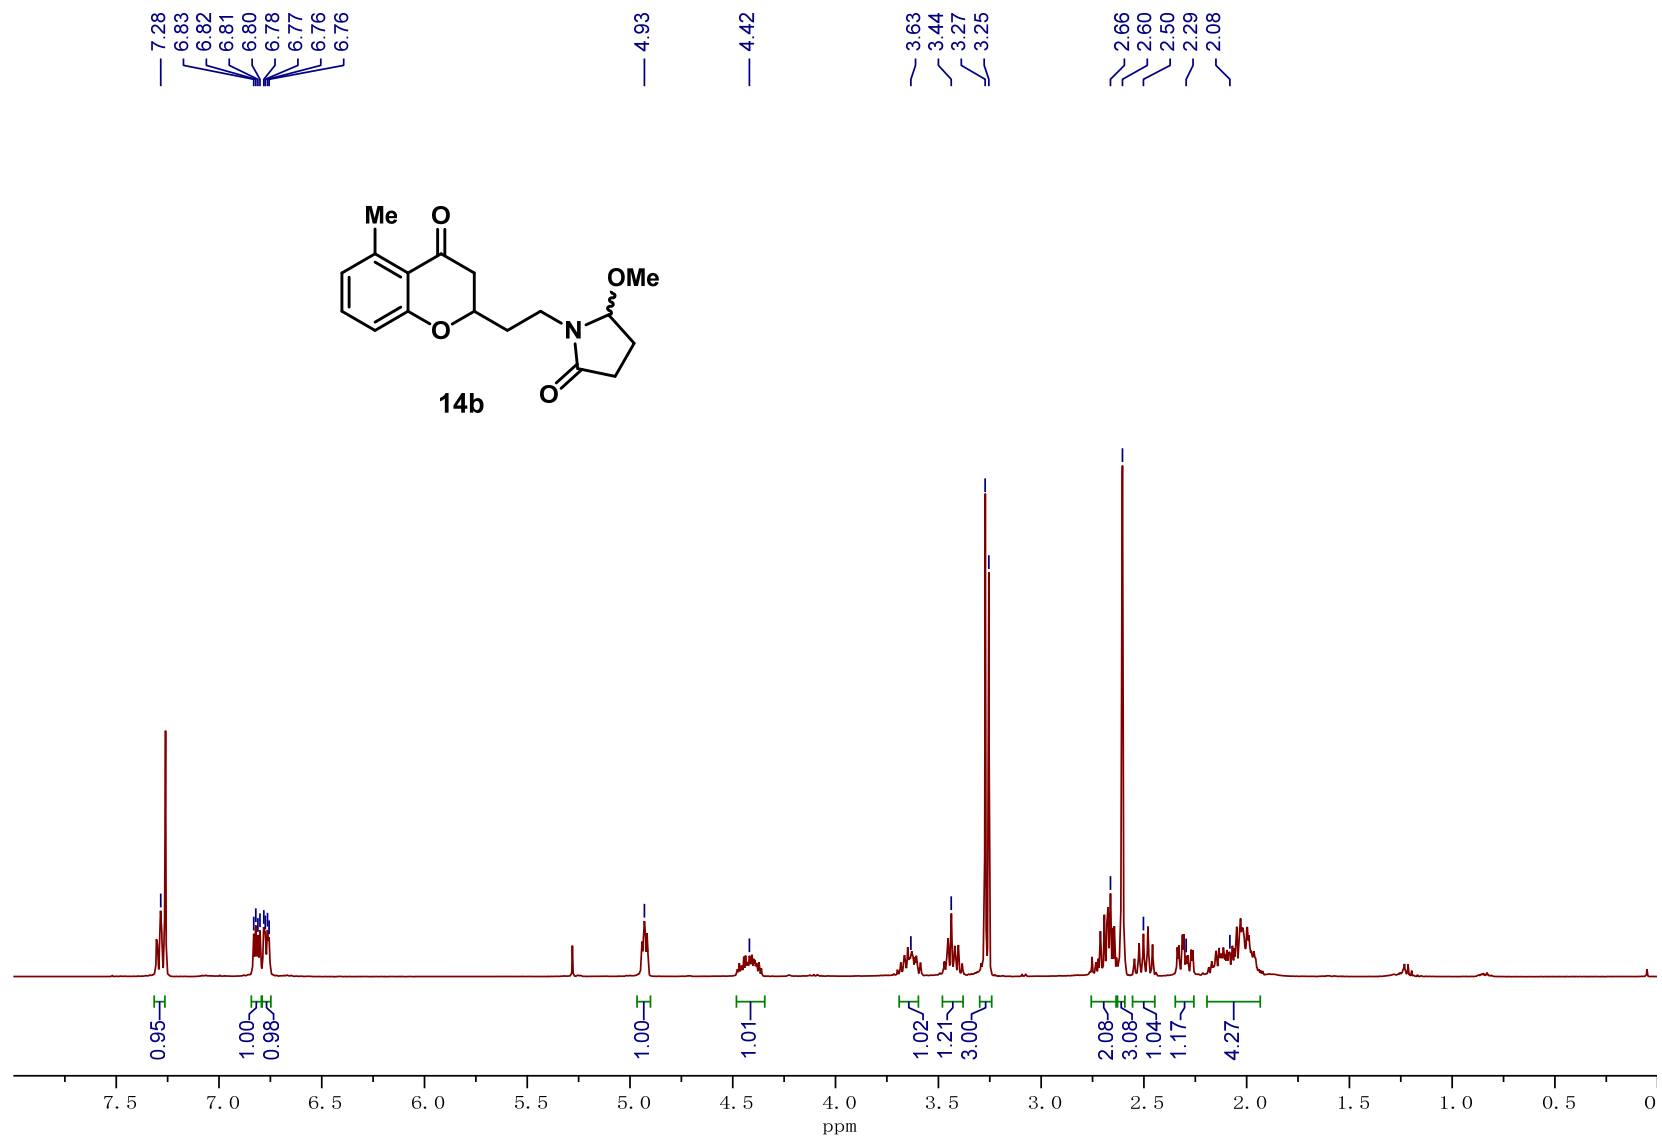

Compound 14b <sup>13</sup>C NMR (101 MHz, Chloroform-*d*)

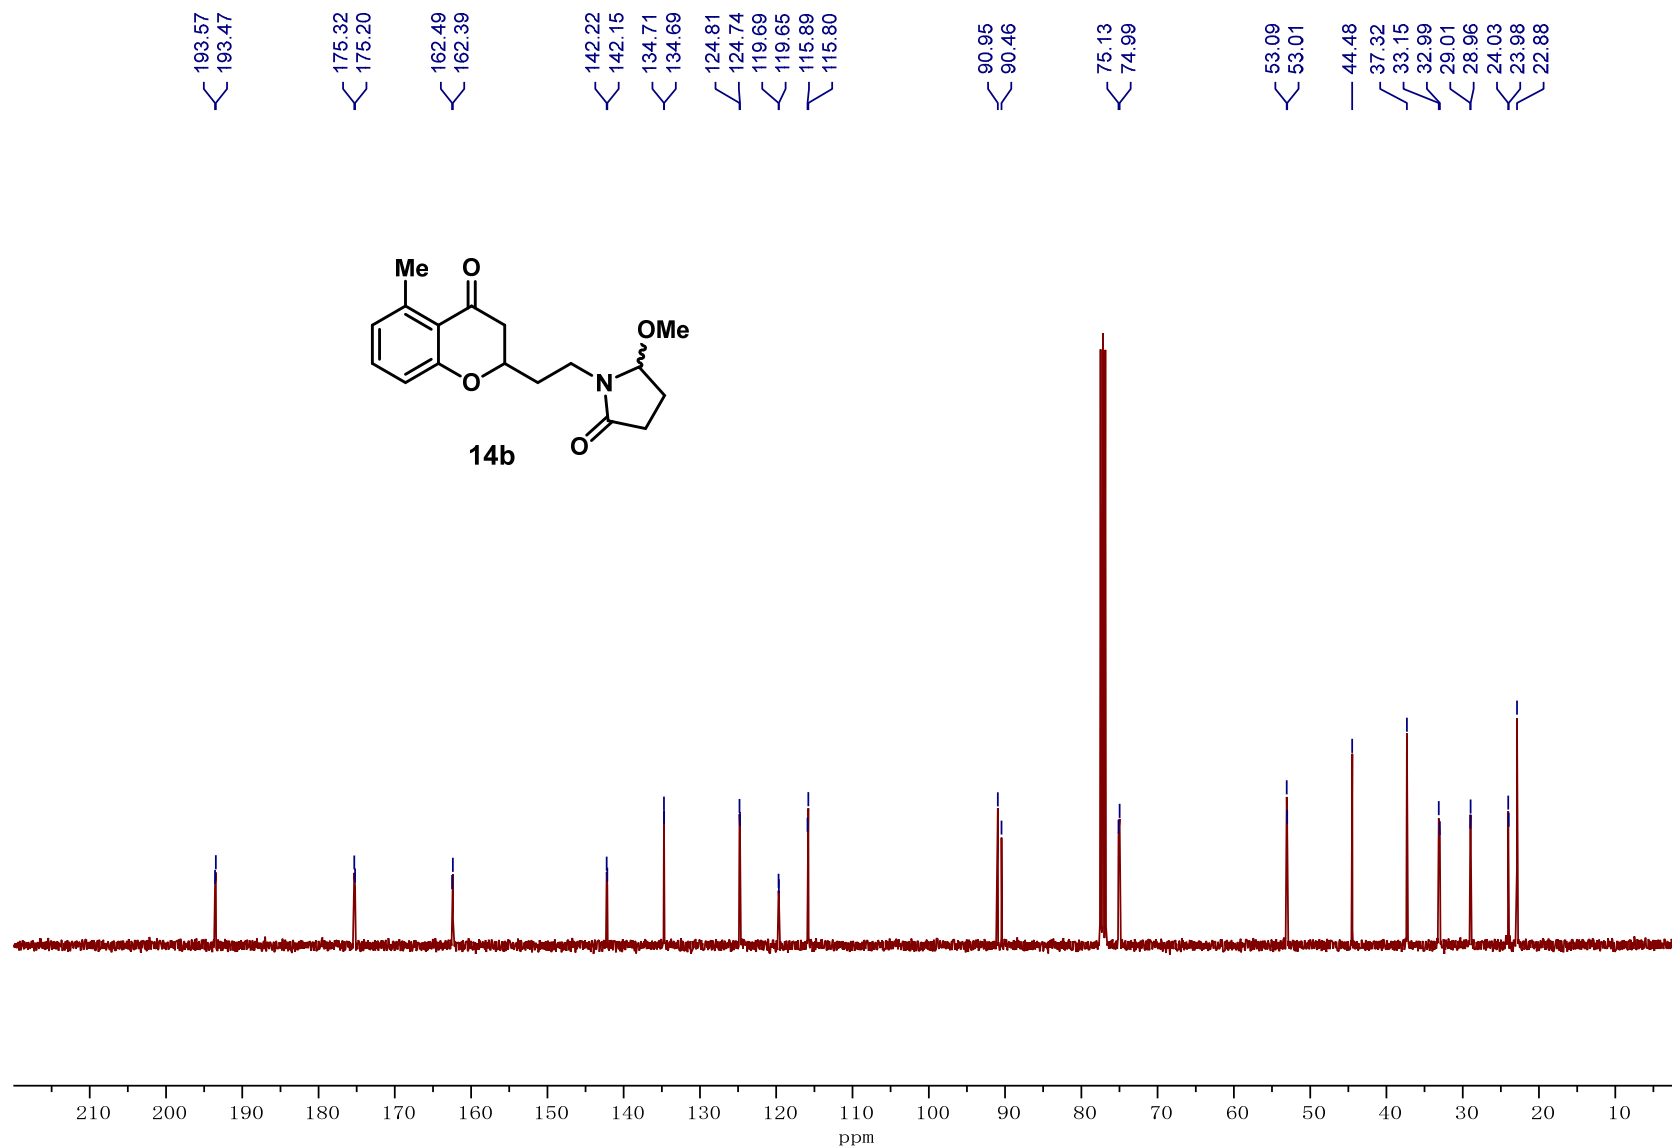

Compound 3 <sup>1</sup>H NMR (400 MHz, Methanol-*d*<sub>4</sub>)

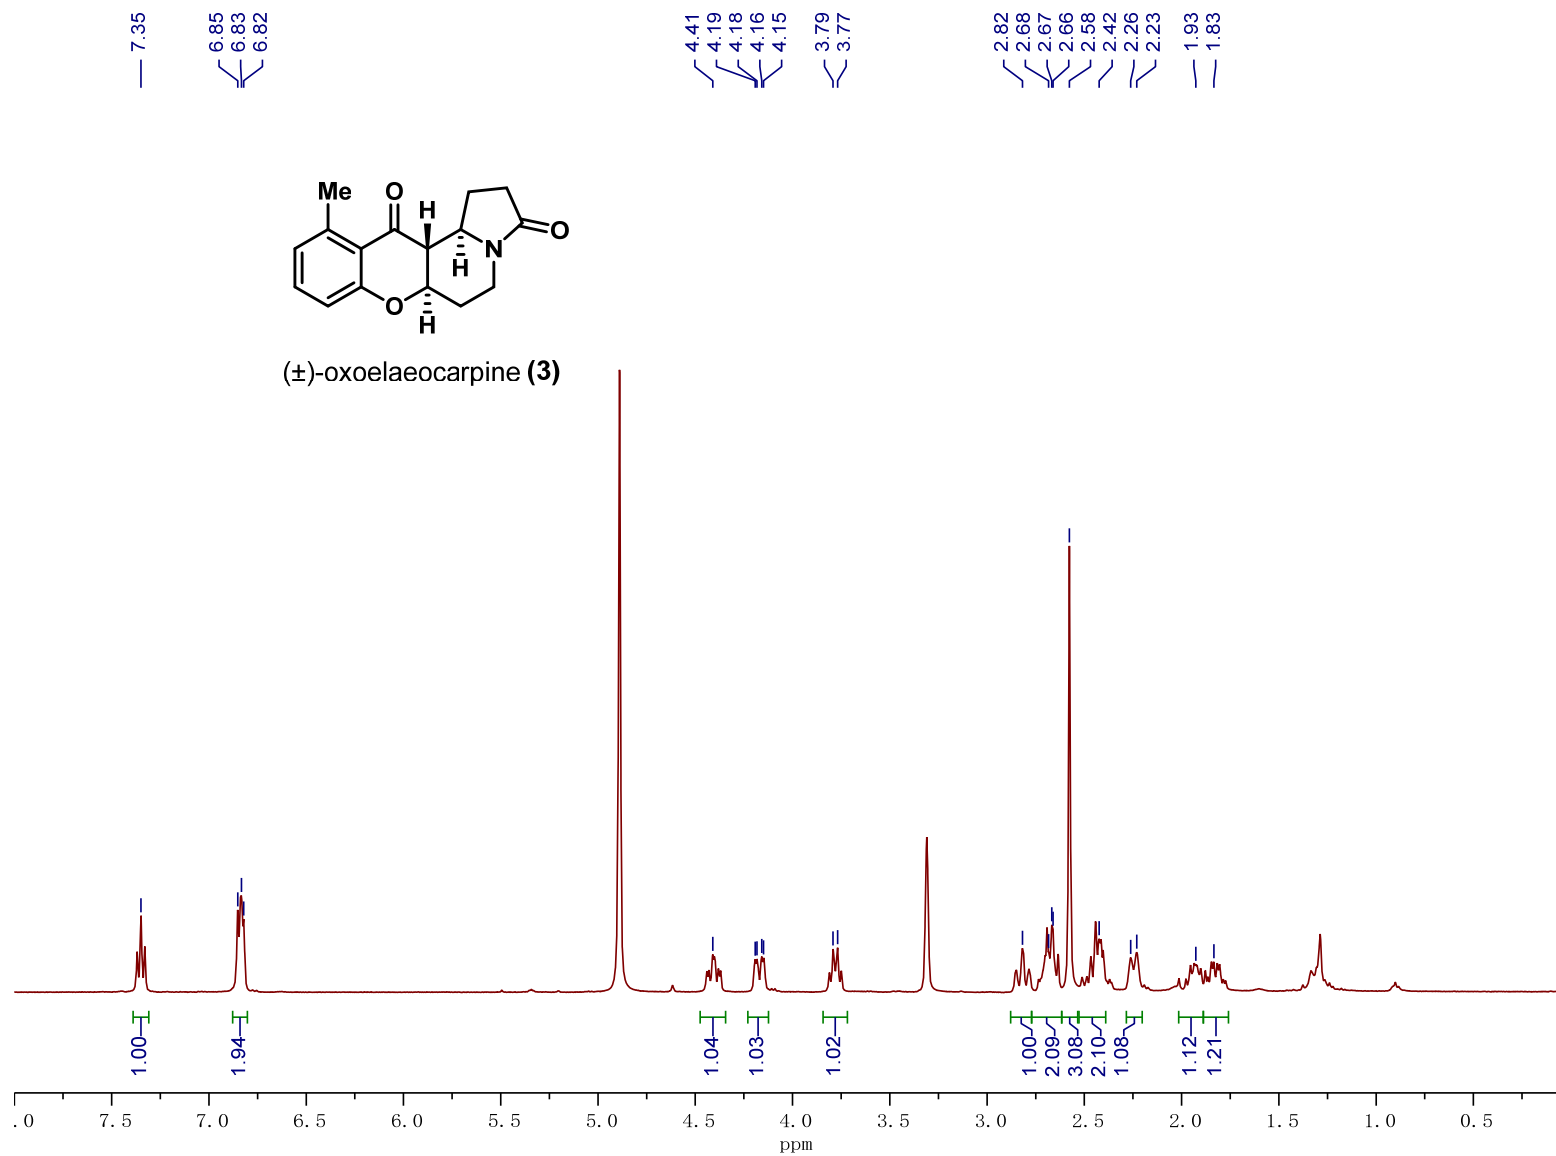

Compound 3 <sup>13</sup>C NMR (101 MHz, Methanol-*d*<sub>4</sub>)

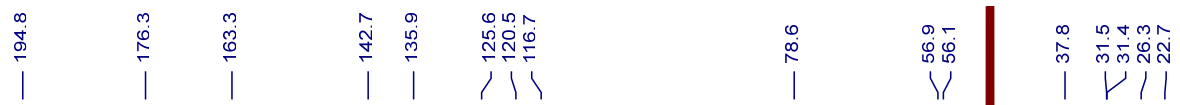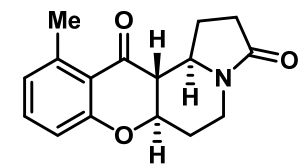

(±)-oxoelaeocarpine (3)

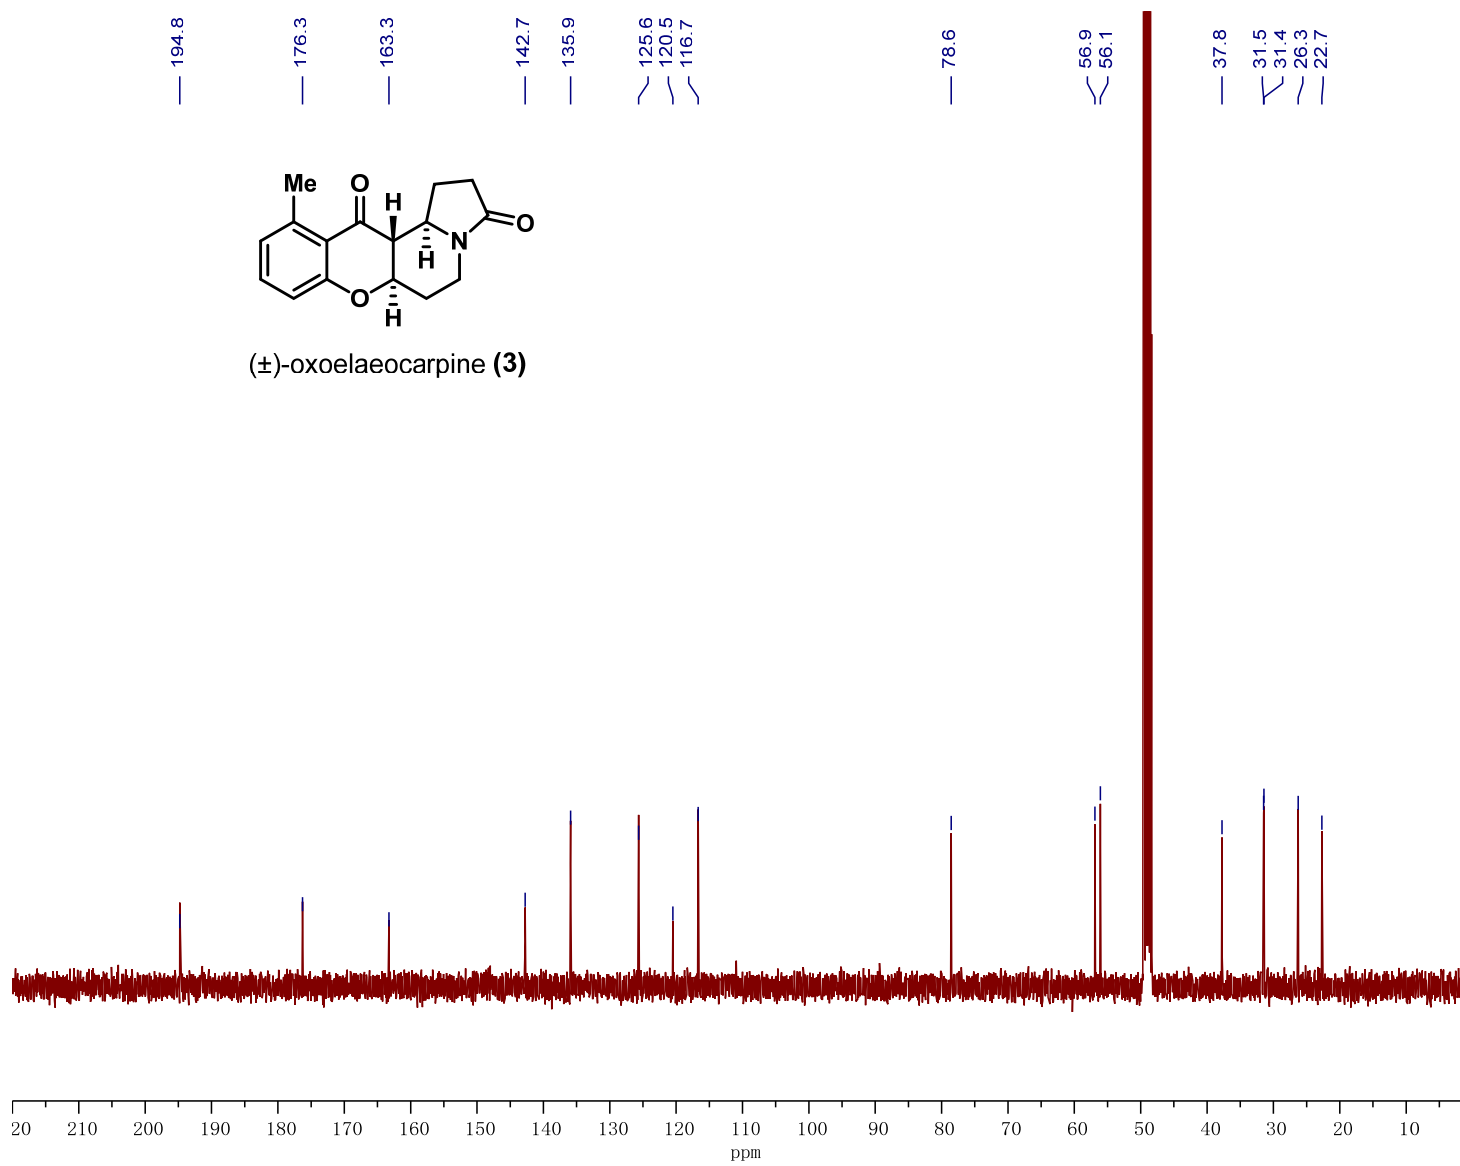

Compound **4**  $^1\text{H}$  NMR (400 MHz, Methanol- $d_4$ )

7.39  
6.93  
6.91  
6.87  
6.85  
4.75  
4.04  
4.02  
4.00  
3.99  
3.81  
3.78  
3.19  
2.59  
2.45  
2.42  
2.36  
2.18  
2.15  
2.04  
1.80

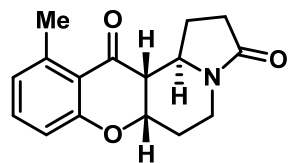

(±)-oxoisoelaecarpine (**4**)

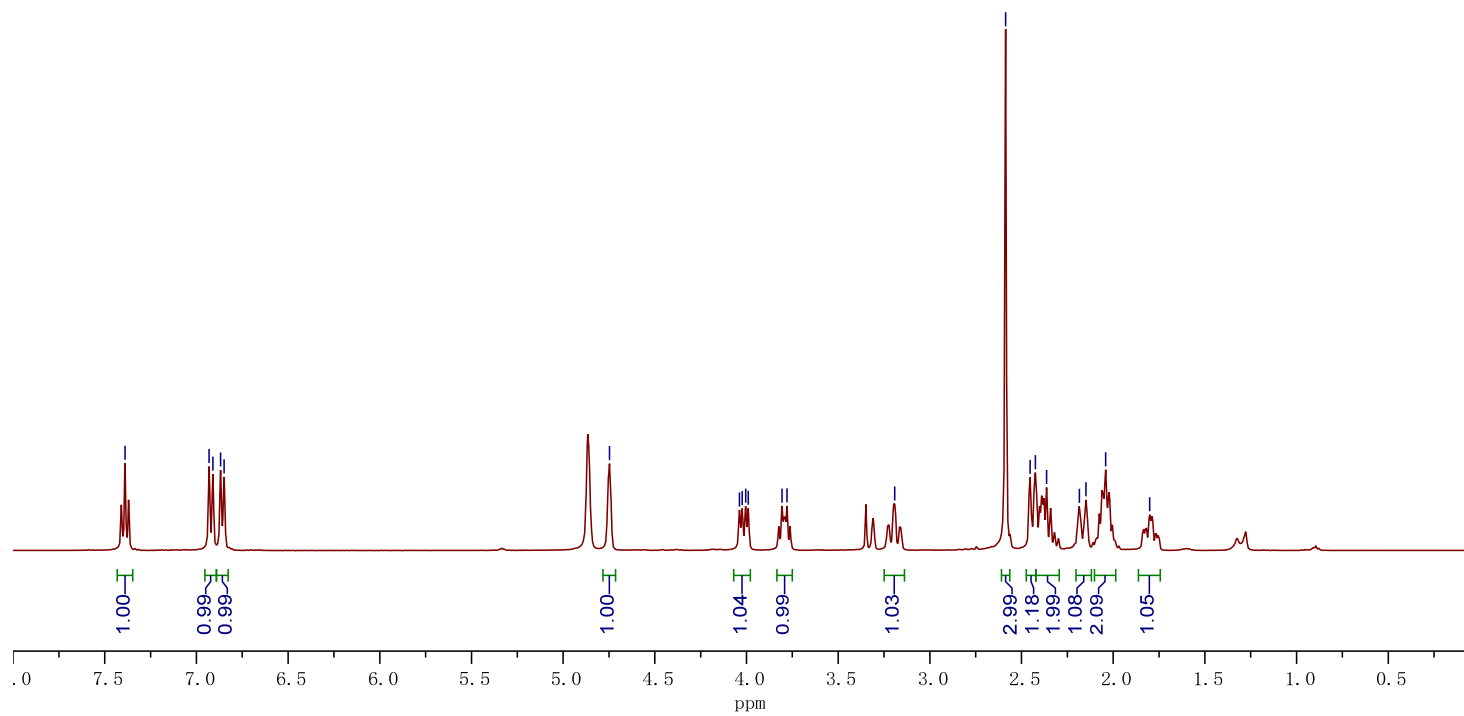

Compound **4**  $^{13}\text{C}$  NMR (400 MHz, Methanol- $d_4$ )

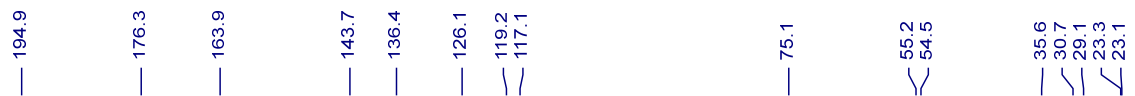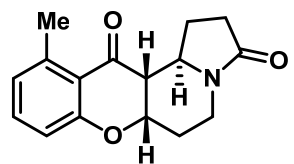

(±)-oxoisoelaecarpine (**4**)

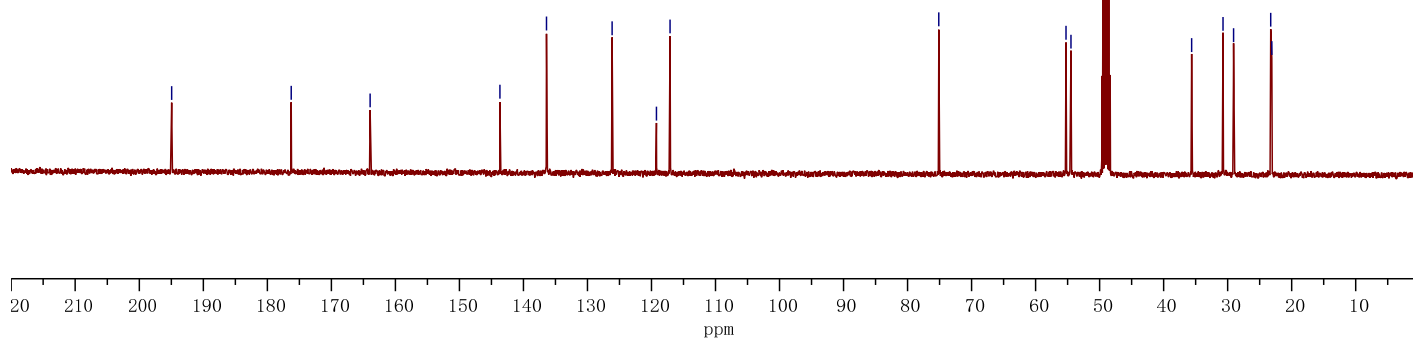

Compound 18 <sup>1</sup>H NMR (400 MHz, Methanol-d<sub>4</sub>)

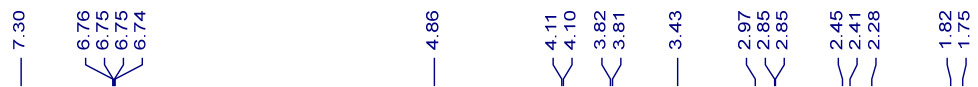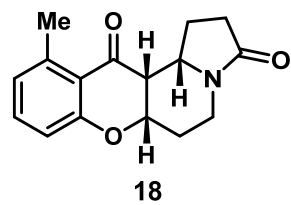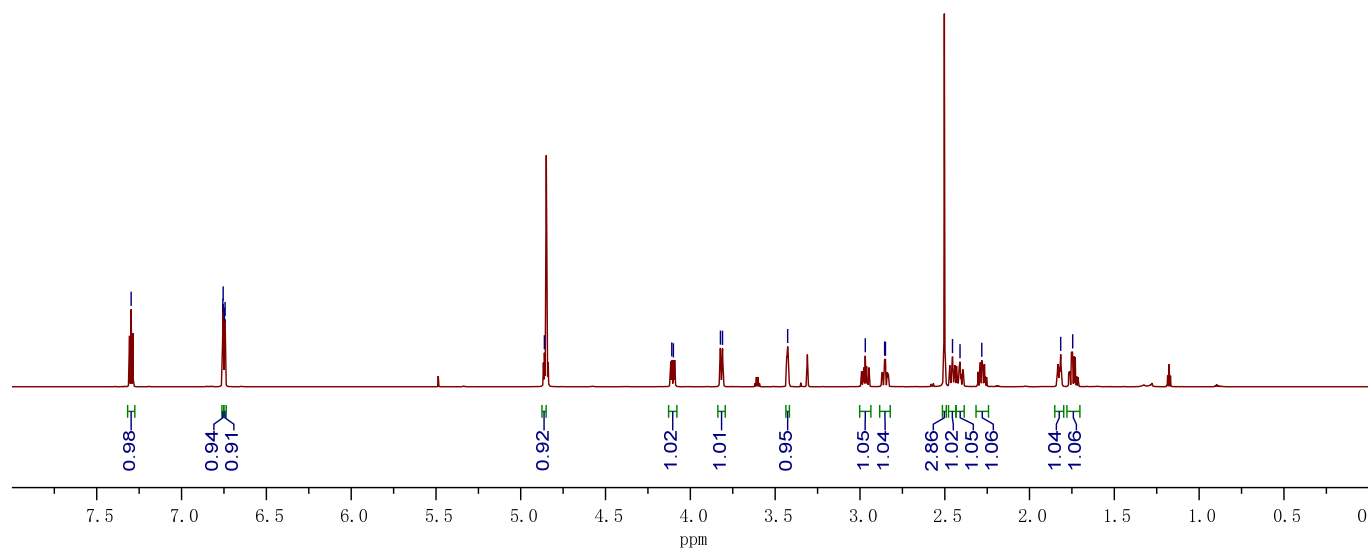

Compound 18 <sup>13</sup>C NMR (101 MHz, Methanol-*d*<sub>4</sub>)

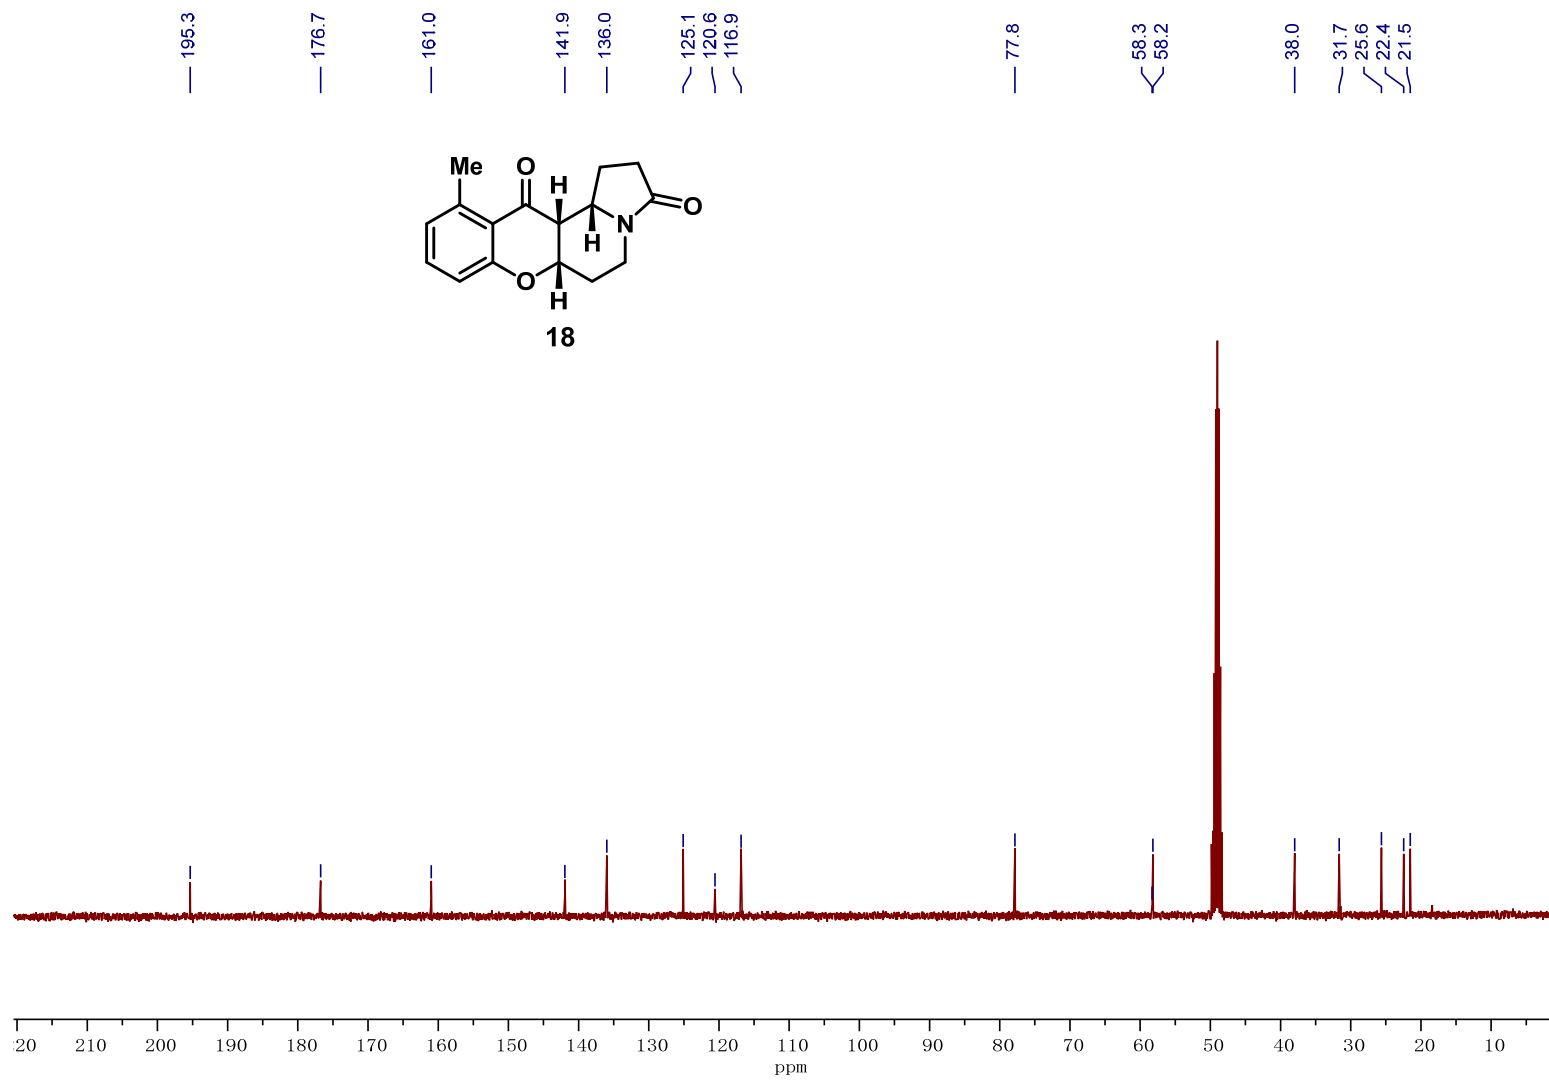



Compound 18 COSY (Methanol-*d*<sub>4</sub>)

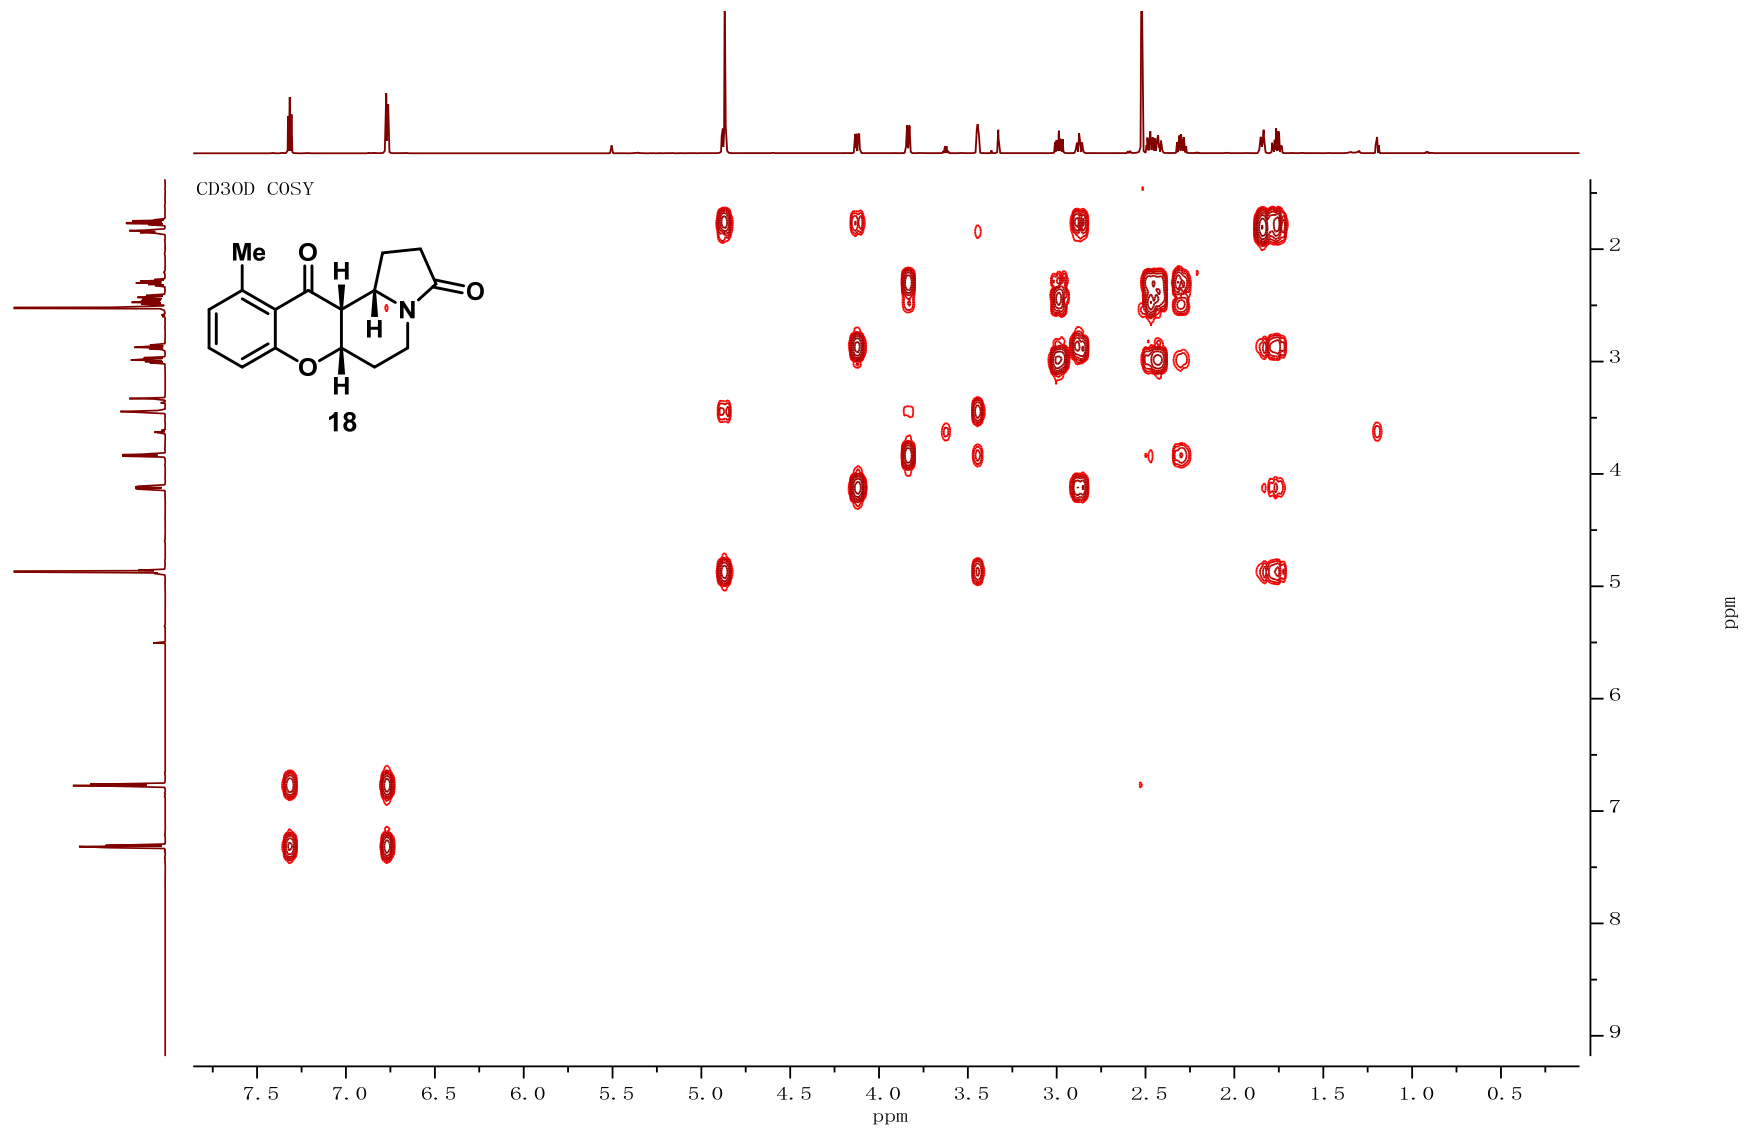

Compound 18 NOESY (Methanol-*d*<sub>4</sub>)

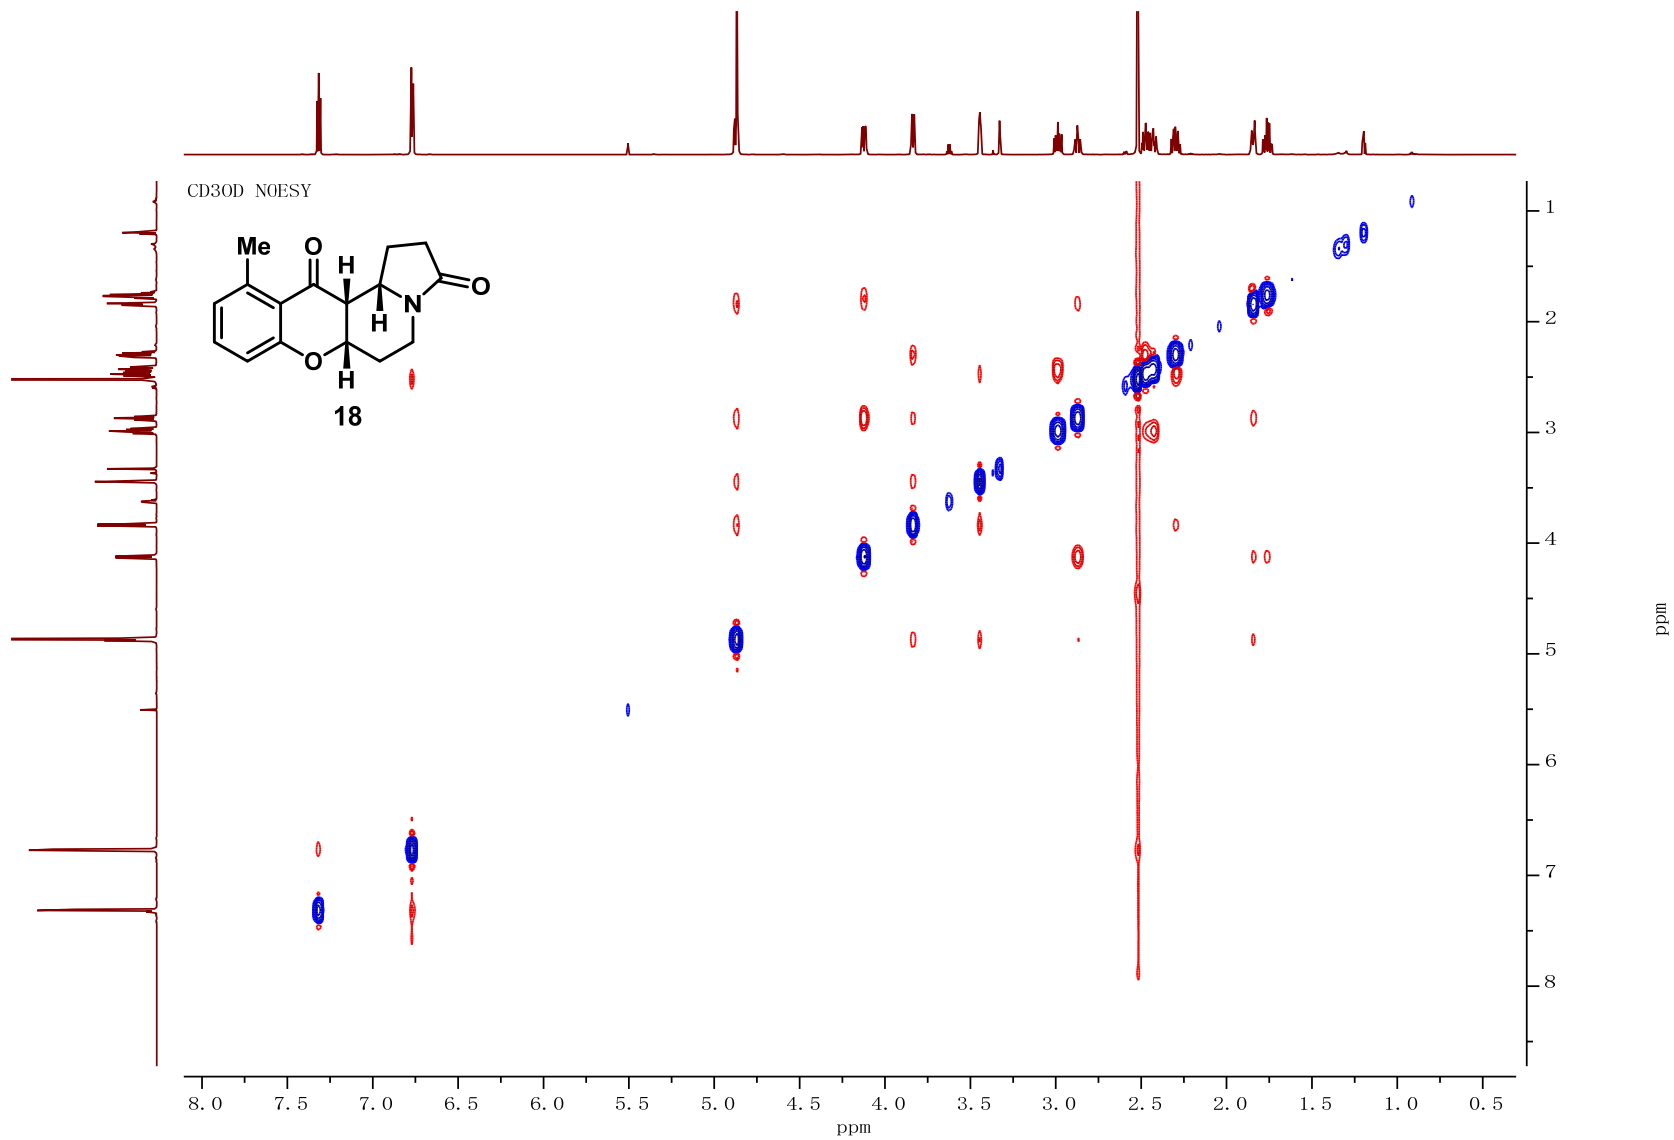

Compound 18 HMBC (Methanol-*d*<sub>4</sub>)

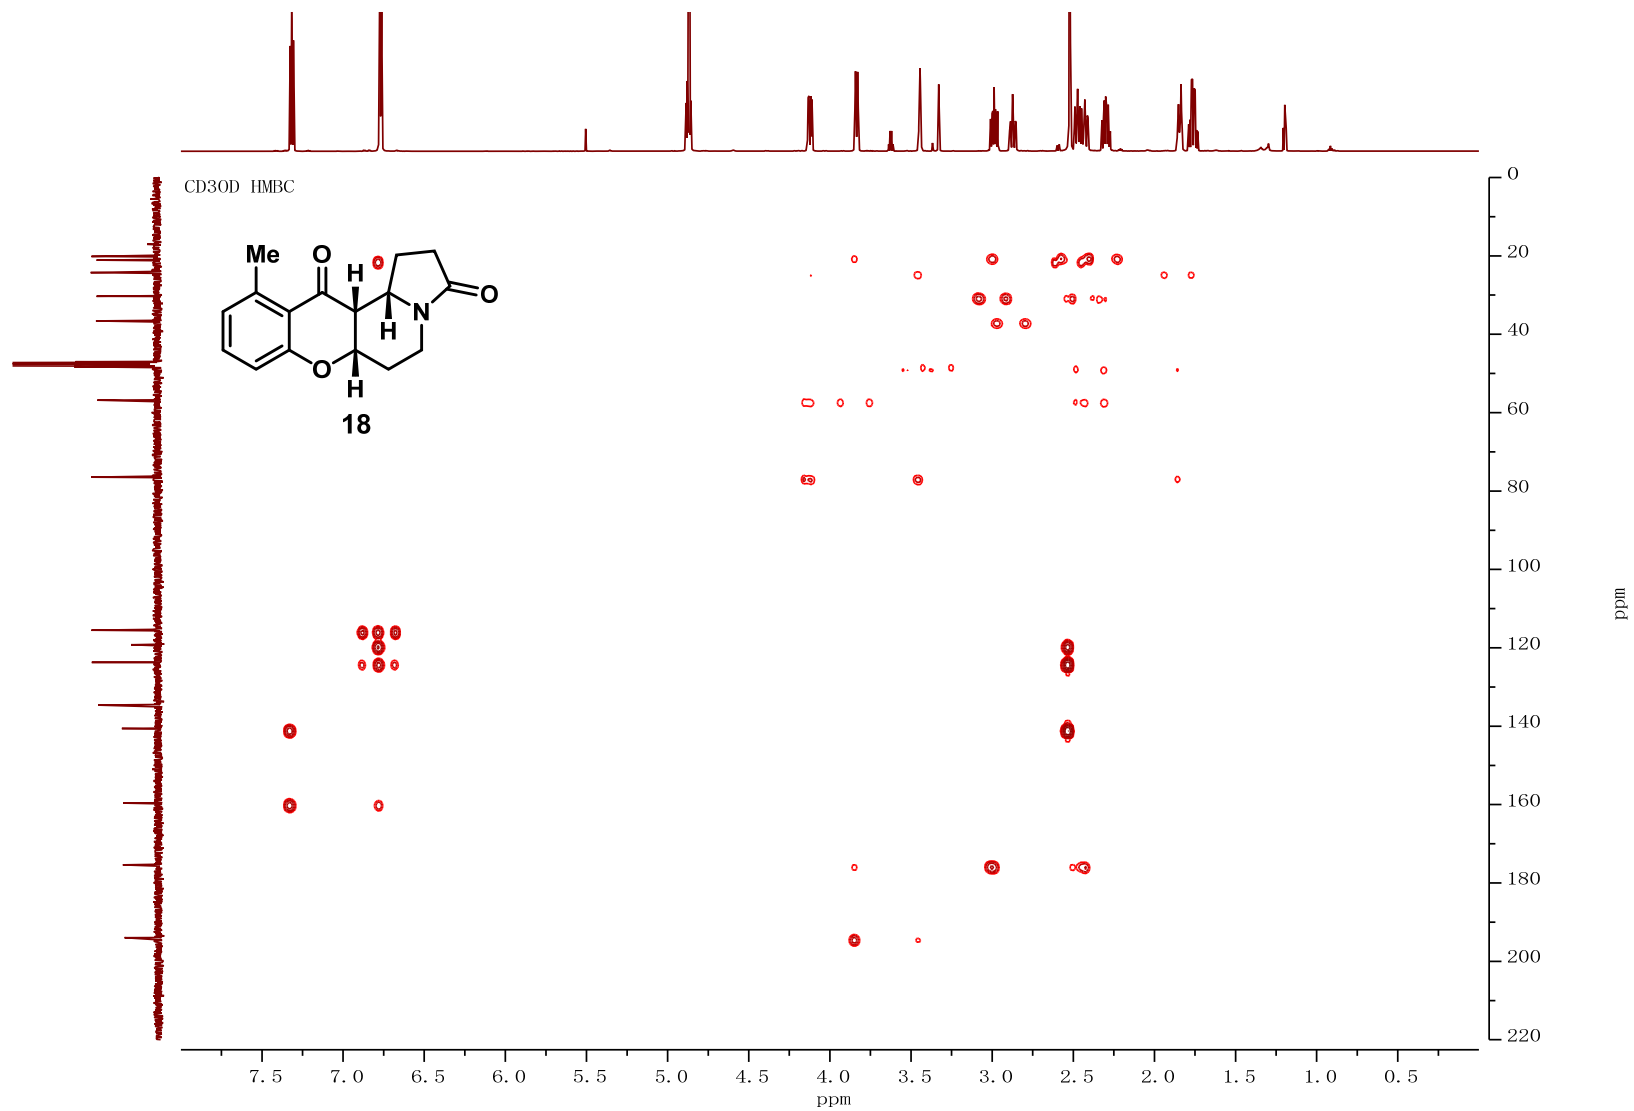

Compound 15 <sup>1</sup>H NMR (400 MHz, Chloroform-*d*)

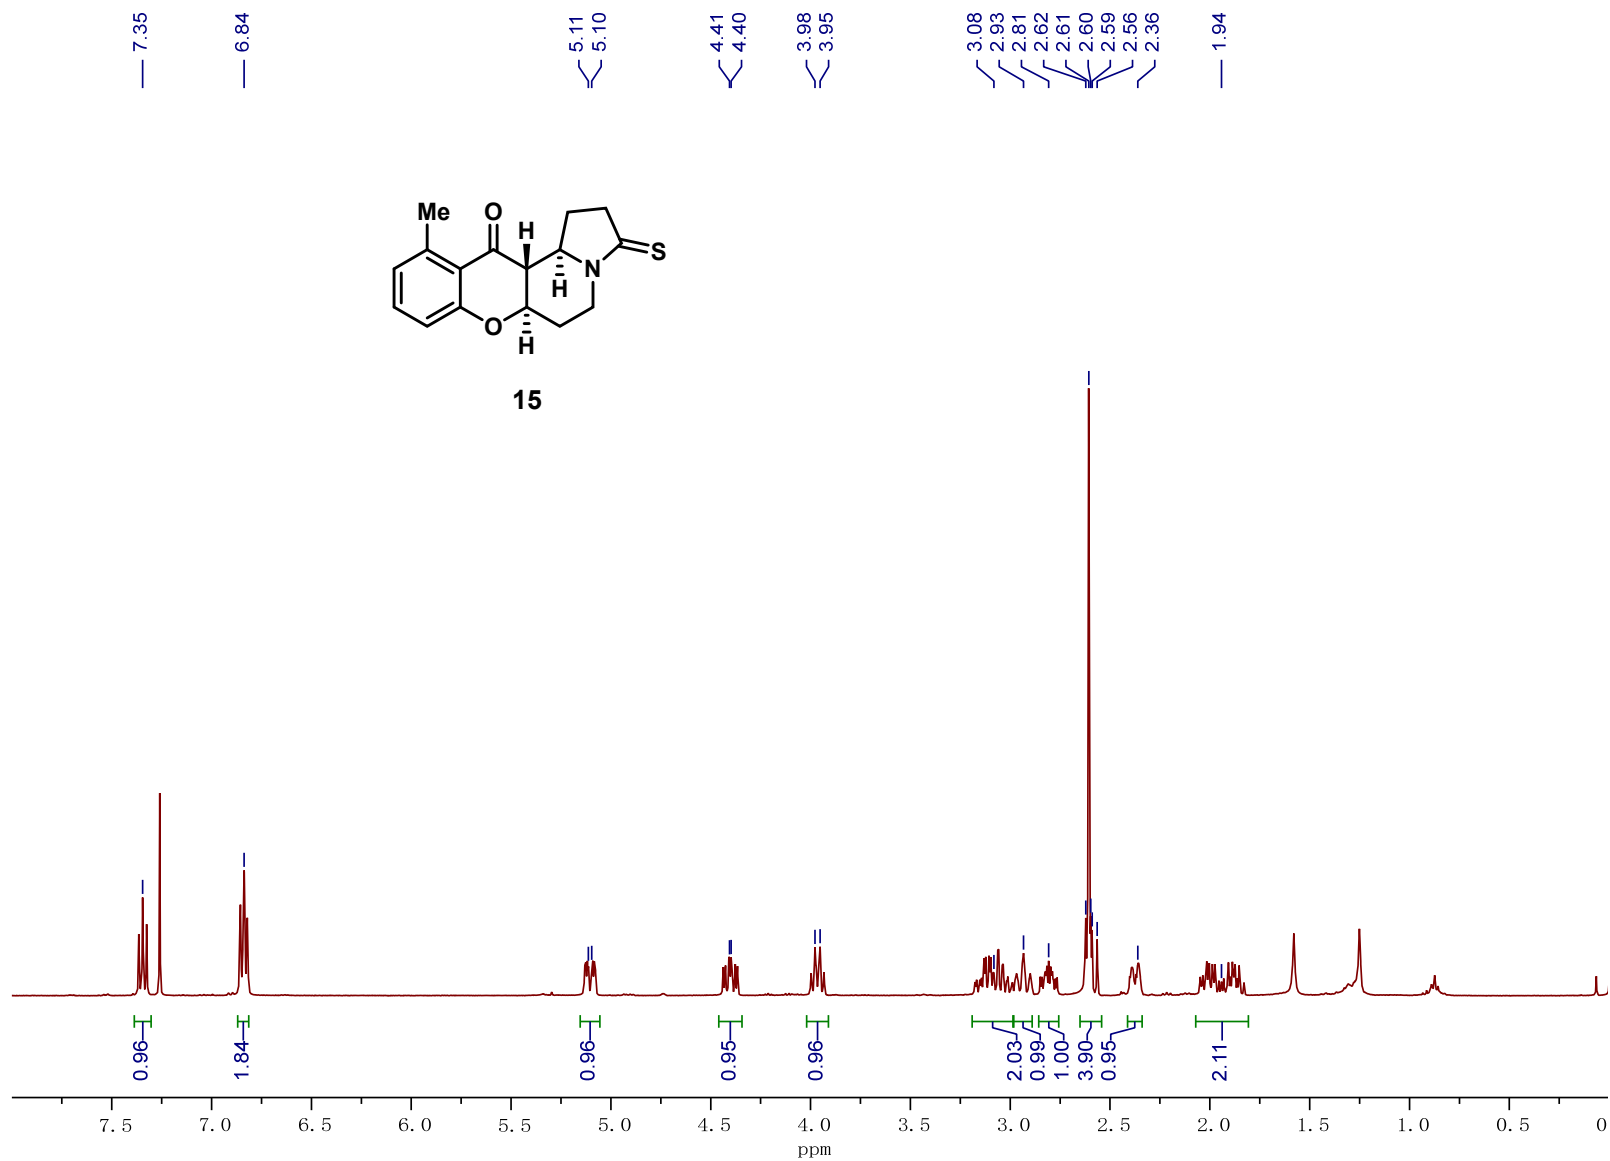

Compound 15 <sup>13</sup>C NMR (101 MHz, Chloroform-*d*)

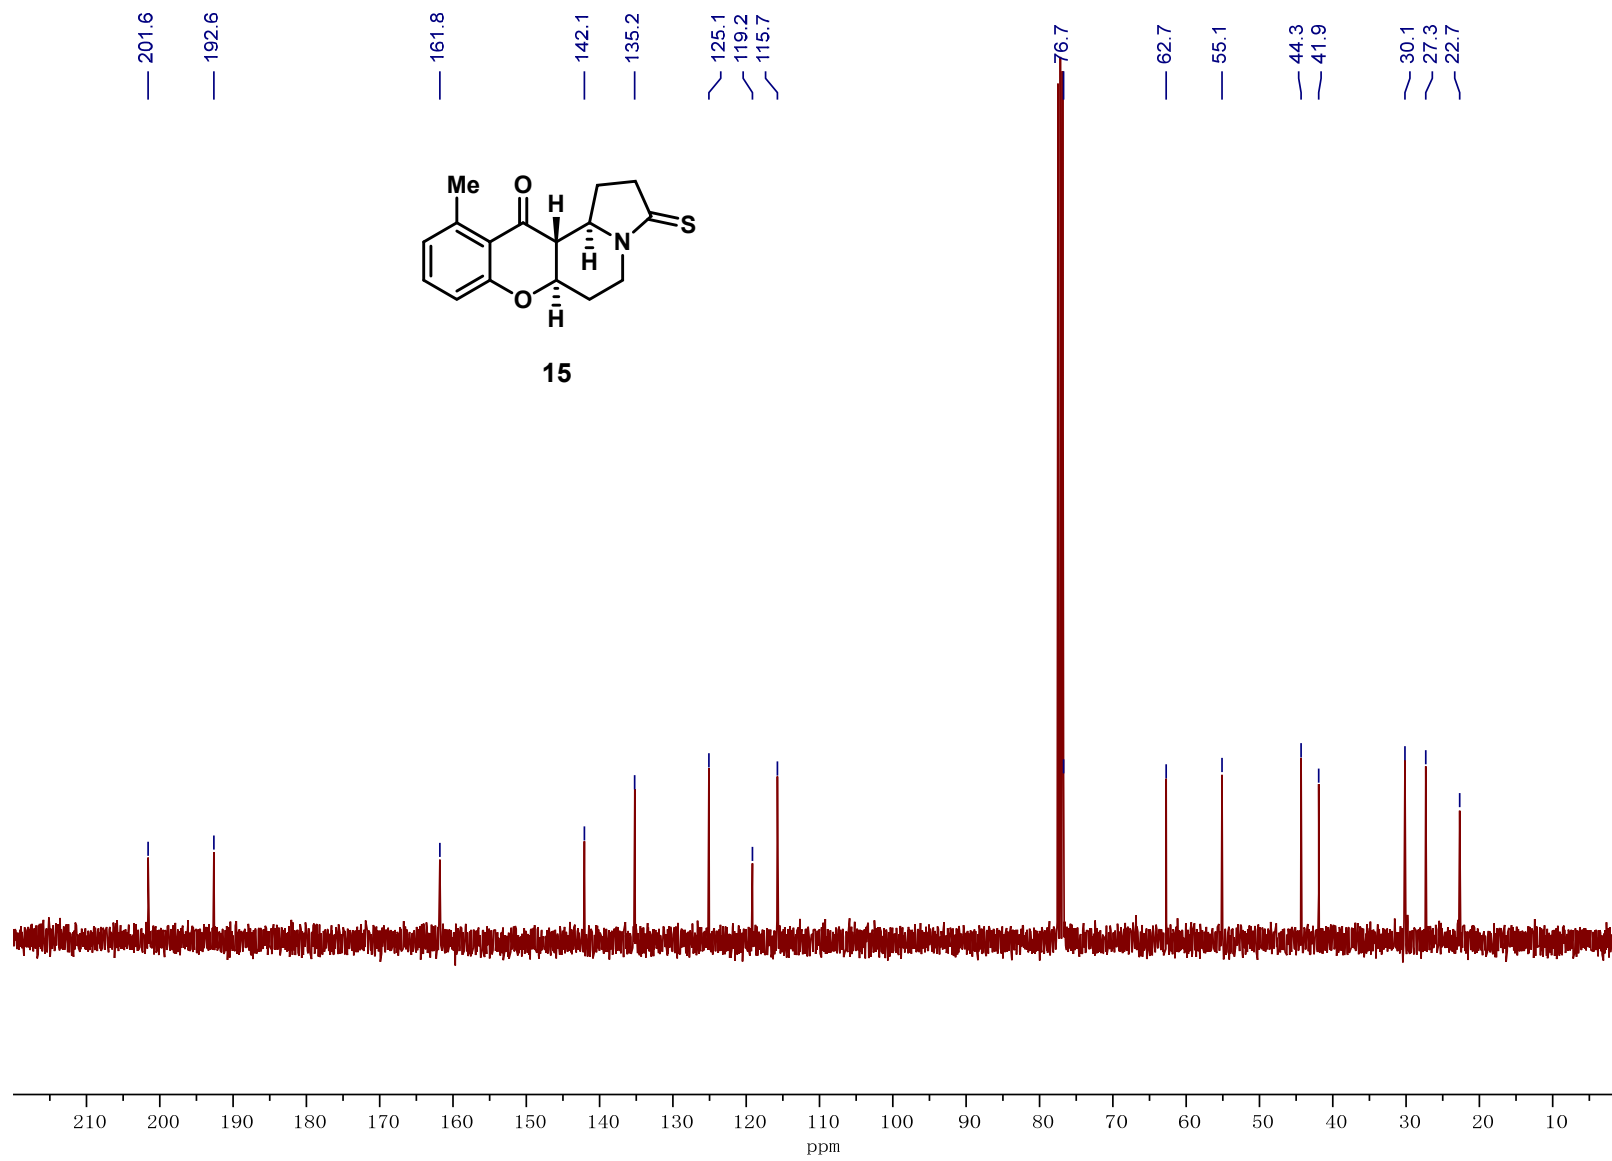

Compound 1 <sup>1</sup>H NMR (400 MHz, Methanol-d<sub>4</sub>)

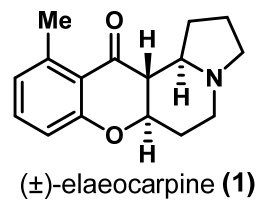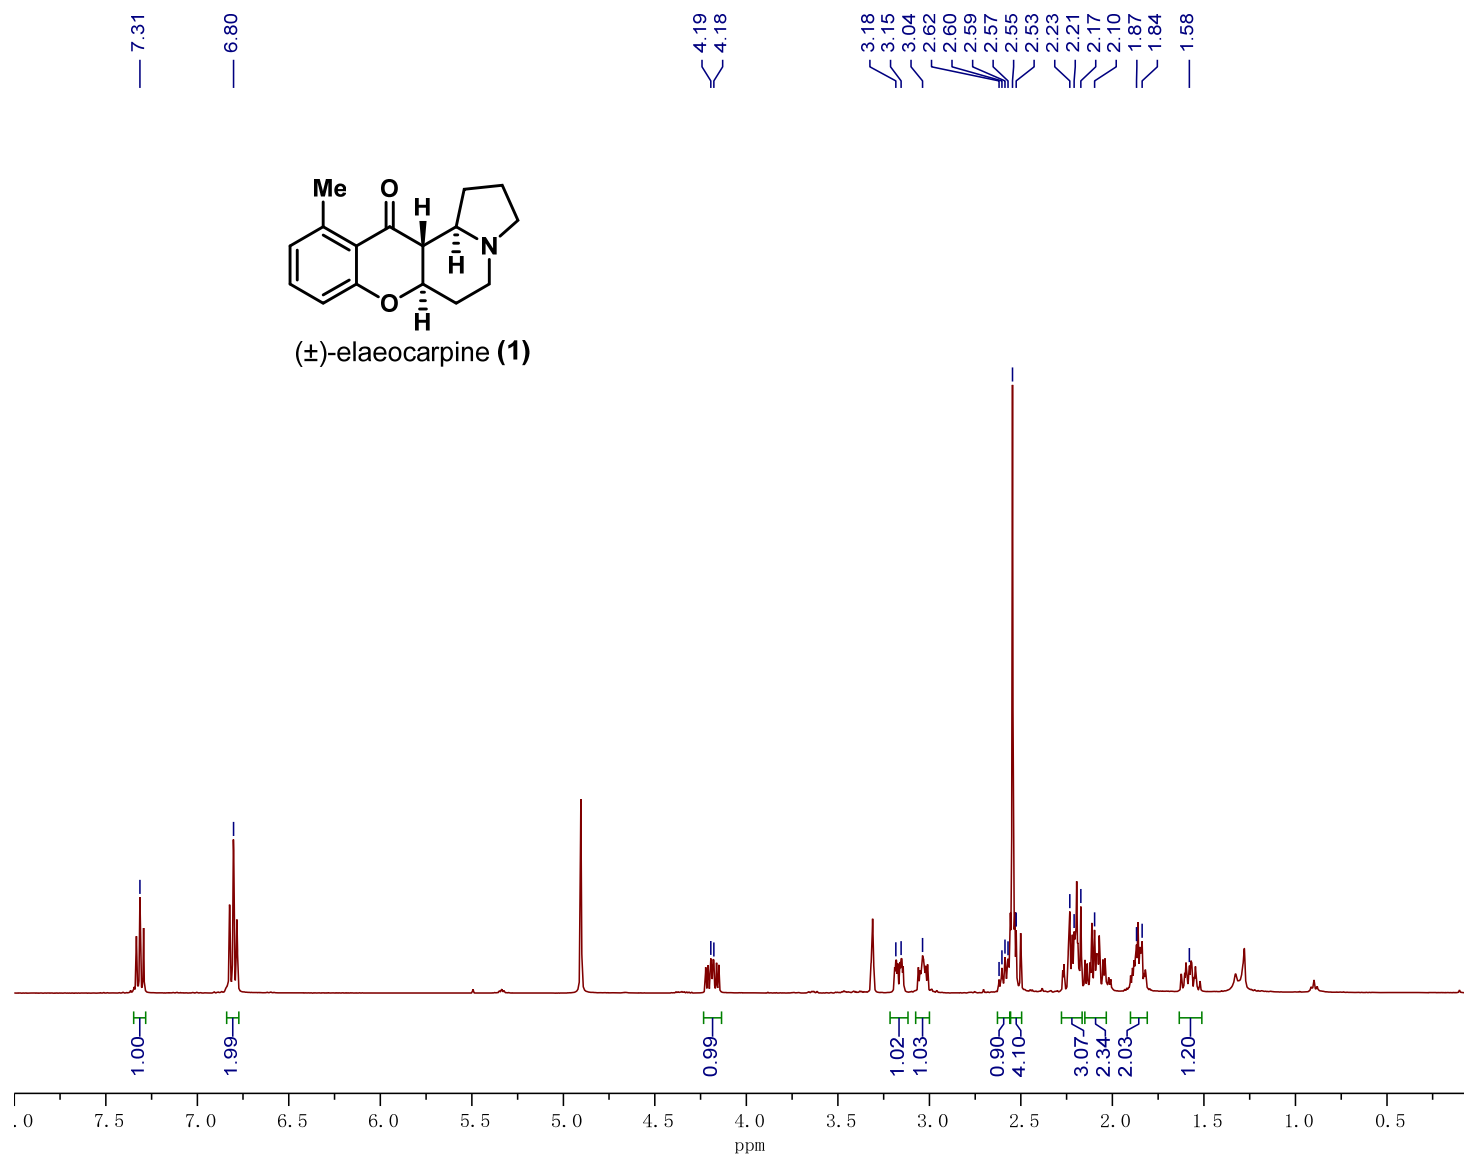

Compound 1 <sup>13</sup>C NMR (101 MHz, Methanol-d<sub>4</sub>)

195.4  
163.4  
142.6  
135.5  
125.5  
120.6  
116.6  
79.6  
63.4  
55.1  
53.5  
49.7  
32.1  
31.0  
22.8  
22.7

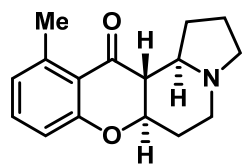

(±)-elaecarpine (1)

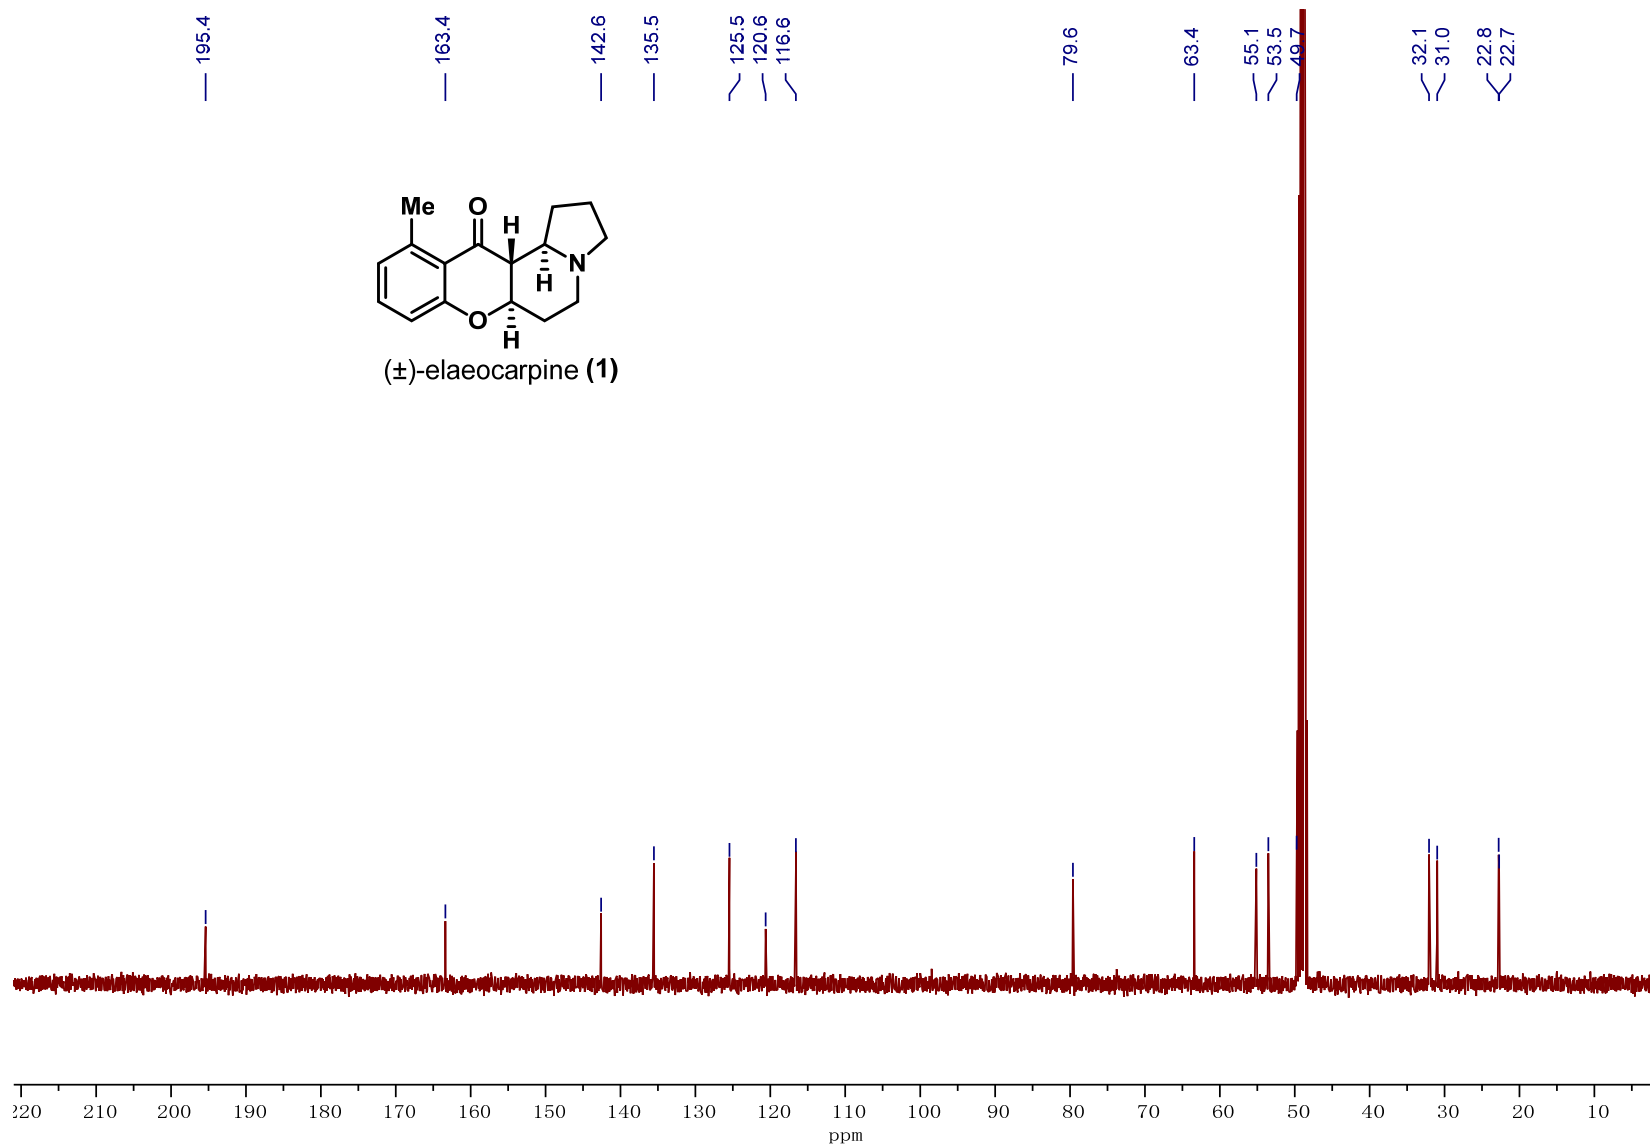

Compound 17 <sup>1</sup>H NMR (400 MHz, Chloroform-*d*)

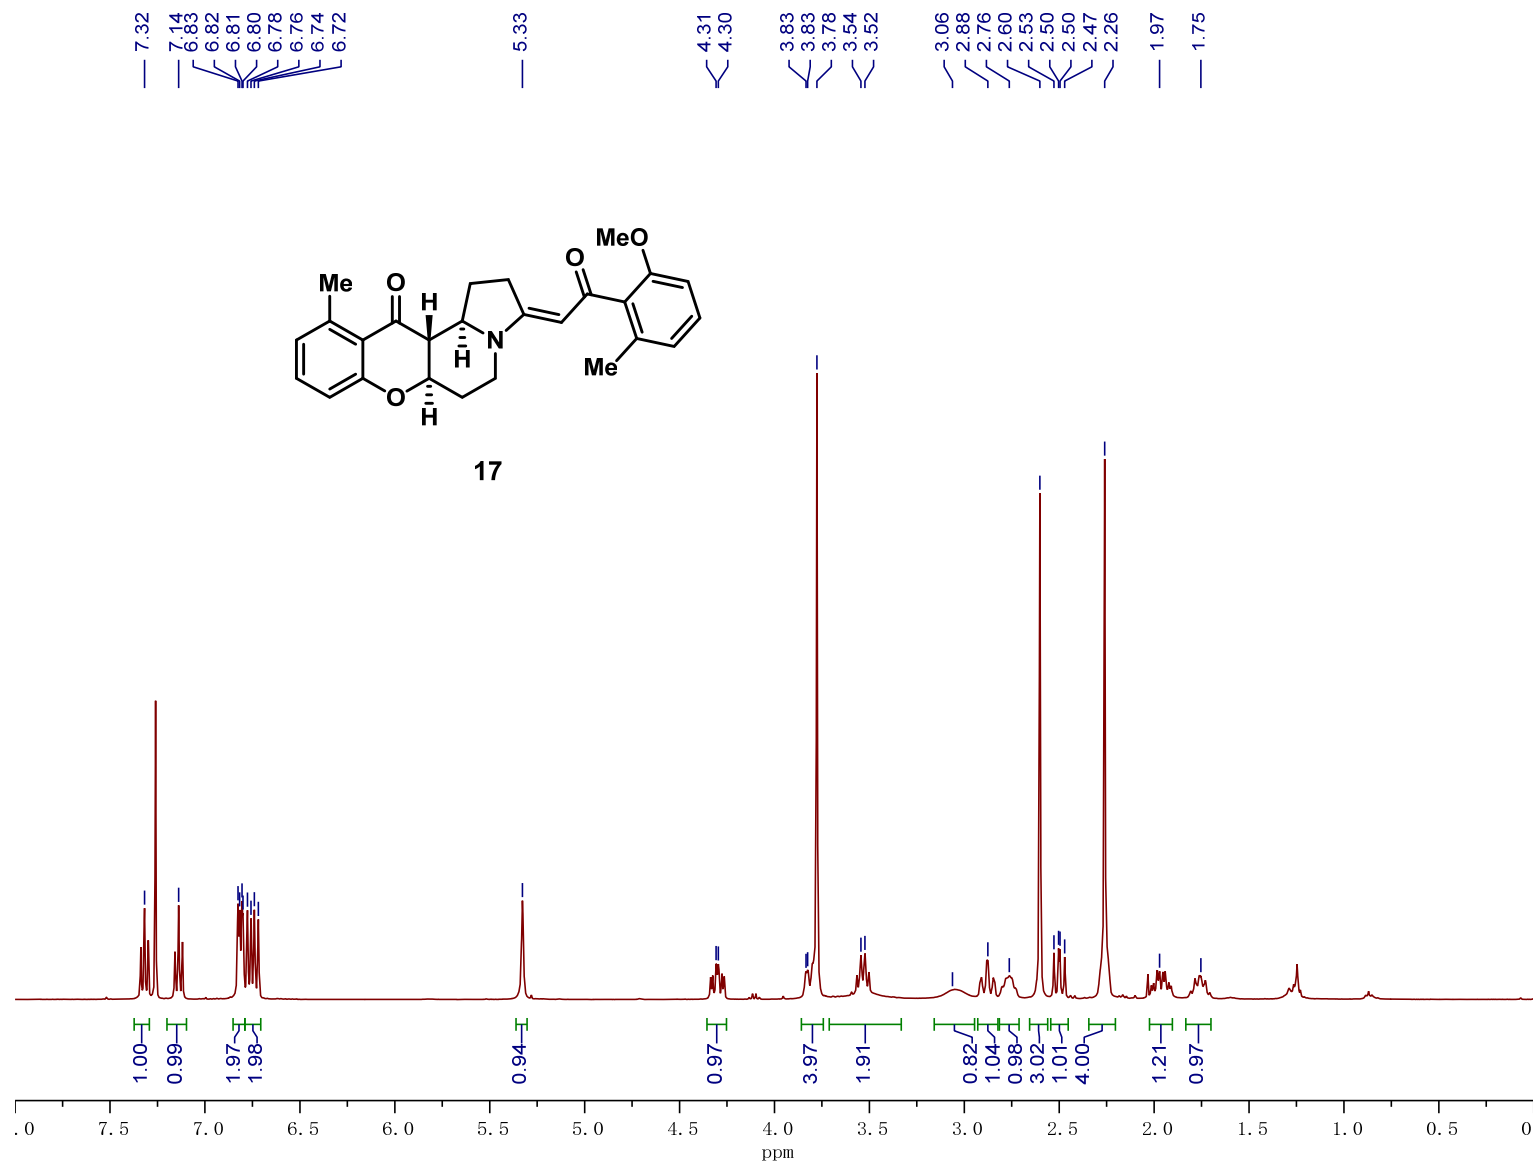

7.32  
7.14  
6.82  
6.81  
6.80  
6.78  
6.76  
6.74  
6.72  
5.33  
4.31  
4.30  
3.83  
3.83  
3.78  
3.54  
3.52  
3.06  
2.88  
2.76  
2.60  
2.53  
2.50  
2.50  
2.47  
2.26  
1.97  
1.75

1.00  
0.99  
1.97  
1.98  
0.94  
0.97  
3.97  
1.91  
0.82  
1.04  
0.98  
3.02  
1.01  
4.00  
1.21  
0.97



Compound 17 <sup>13</sup>C NMR (101 MHz, Chloroform-*d*)

193.0  
192.4

164.7  
161.7  
155.6

142.0  
135.4  
134.9  
134.5  
128.3  
124.9  
122.6  
119.3  
115.6

108.4

93.5

77.2

59.8  
55.9  
54.6

40.2

32.8  
30.2  
28.5  
22.7  
19.2

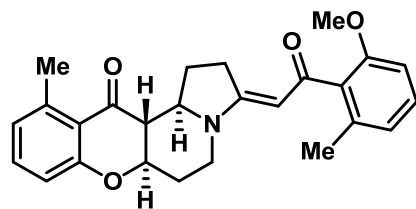

17

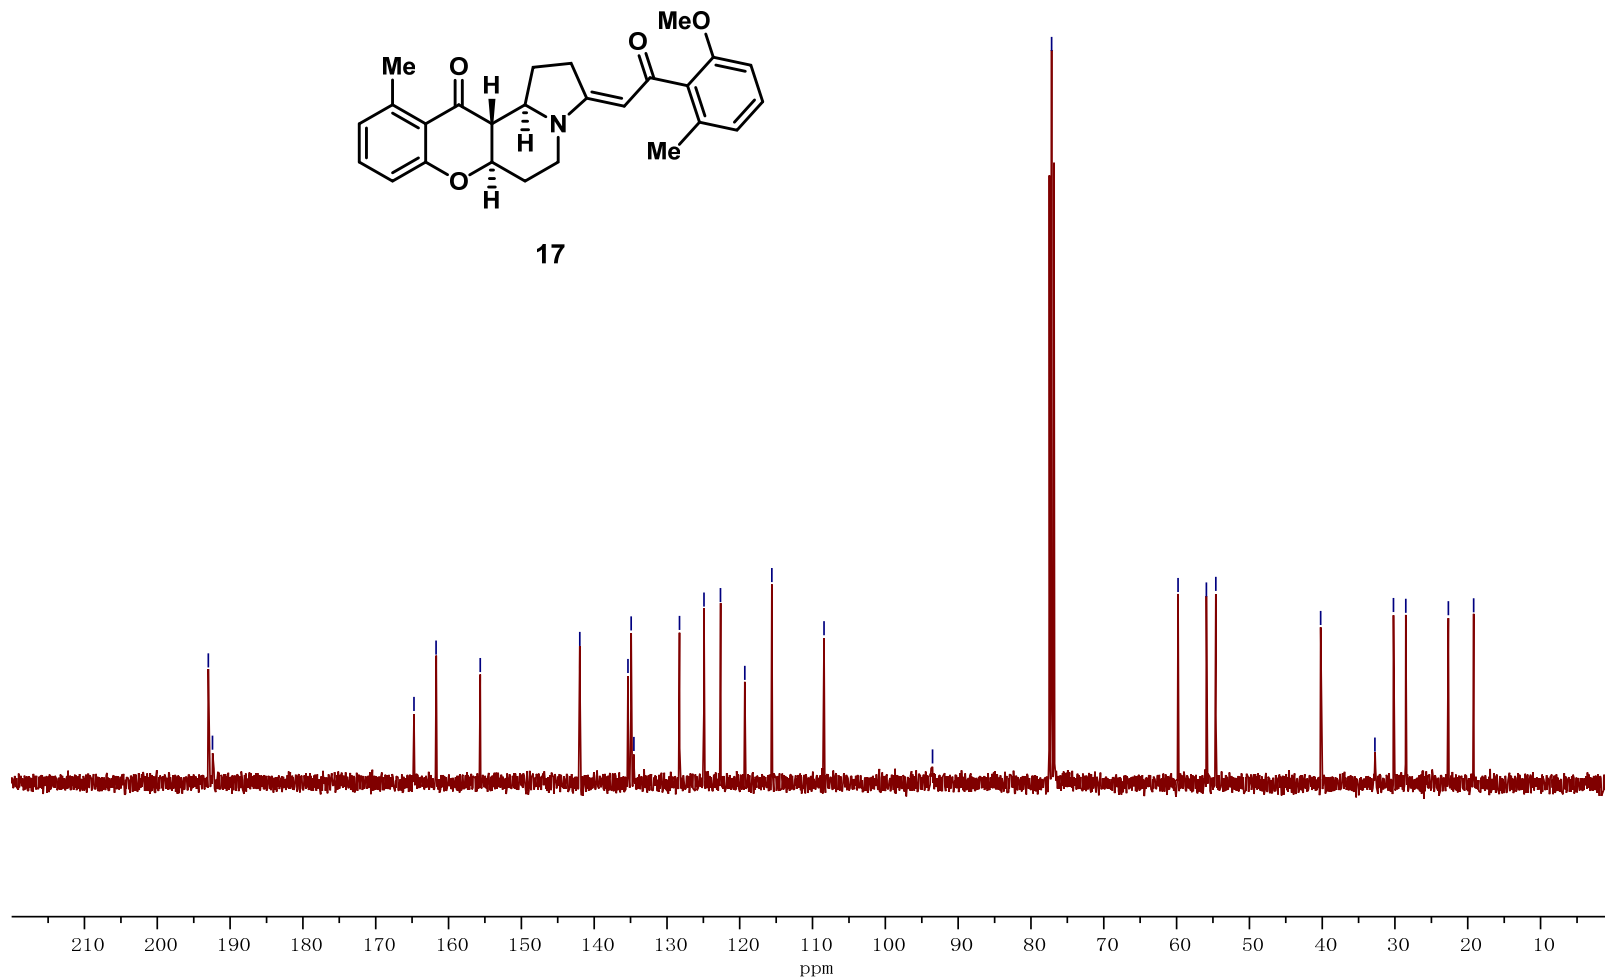

Compound S4 <sup>1</sup>H NMR (400 MHz, Acetone-*d*<sub>6</sub>)

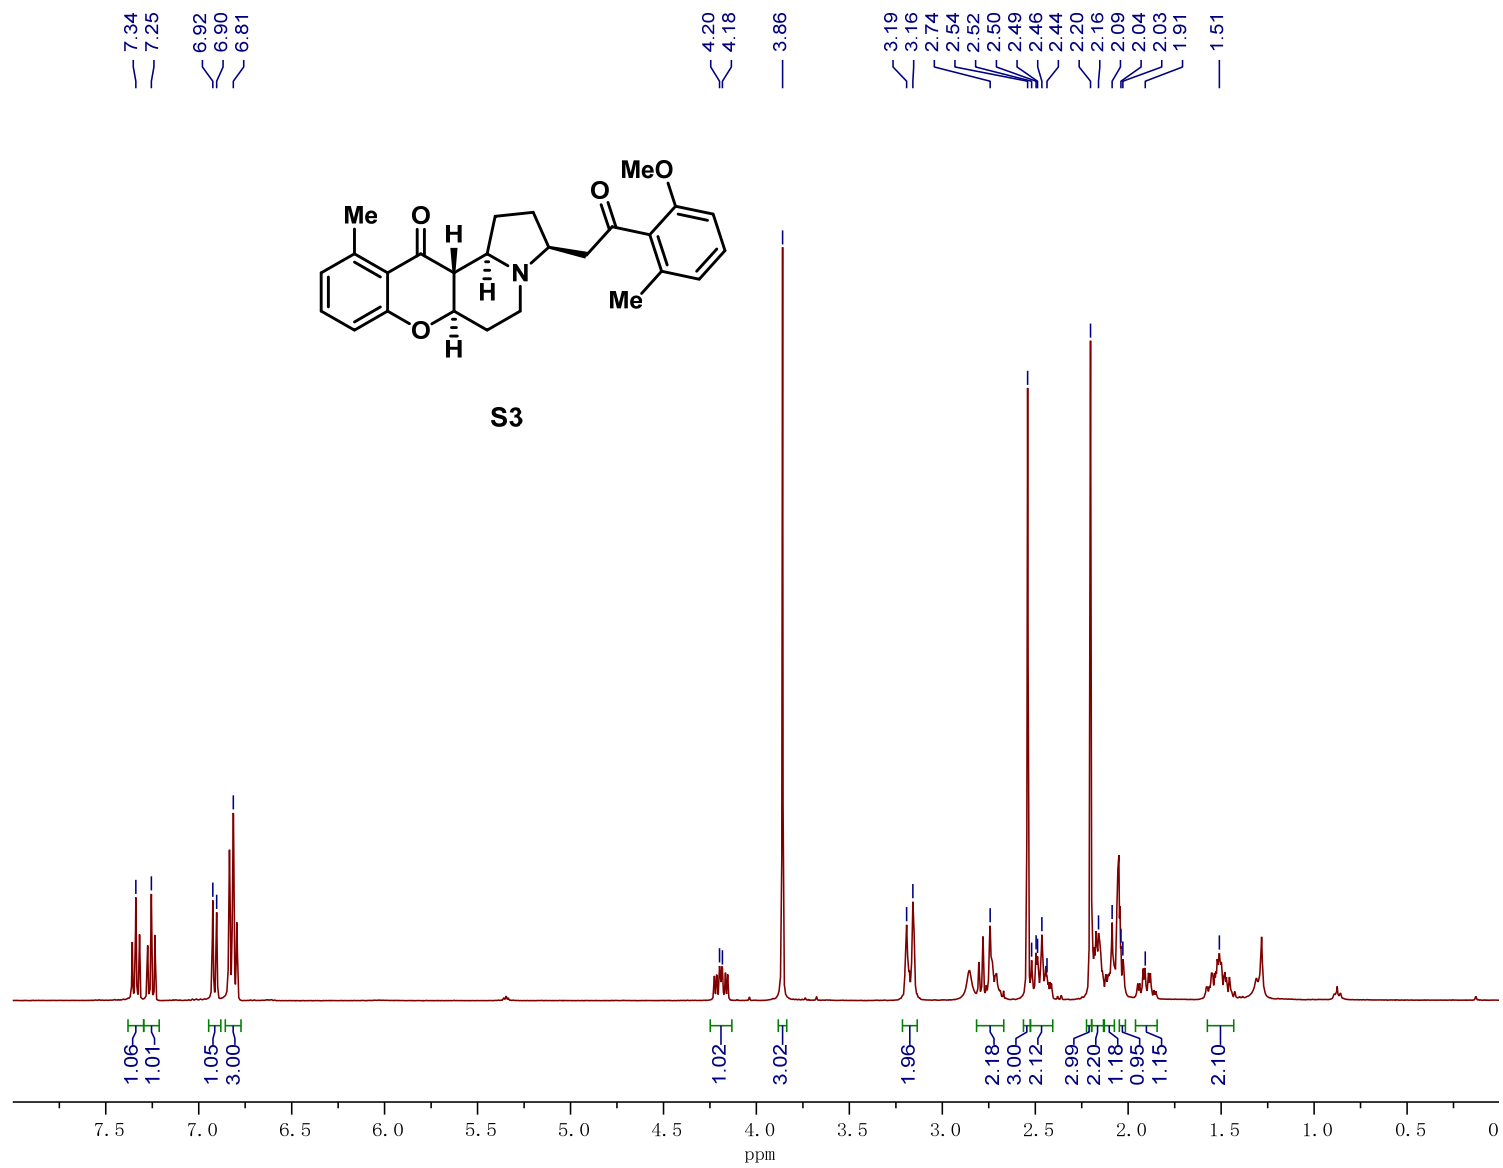

Compound S4 <sup>13</sup>C NMR (101 MHz, Acetone-*d*<sub>6</sub>)

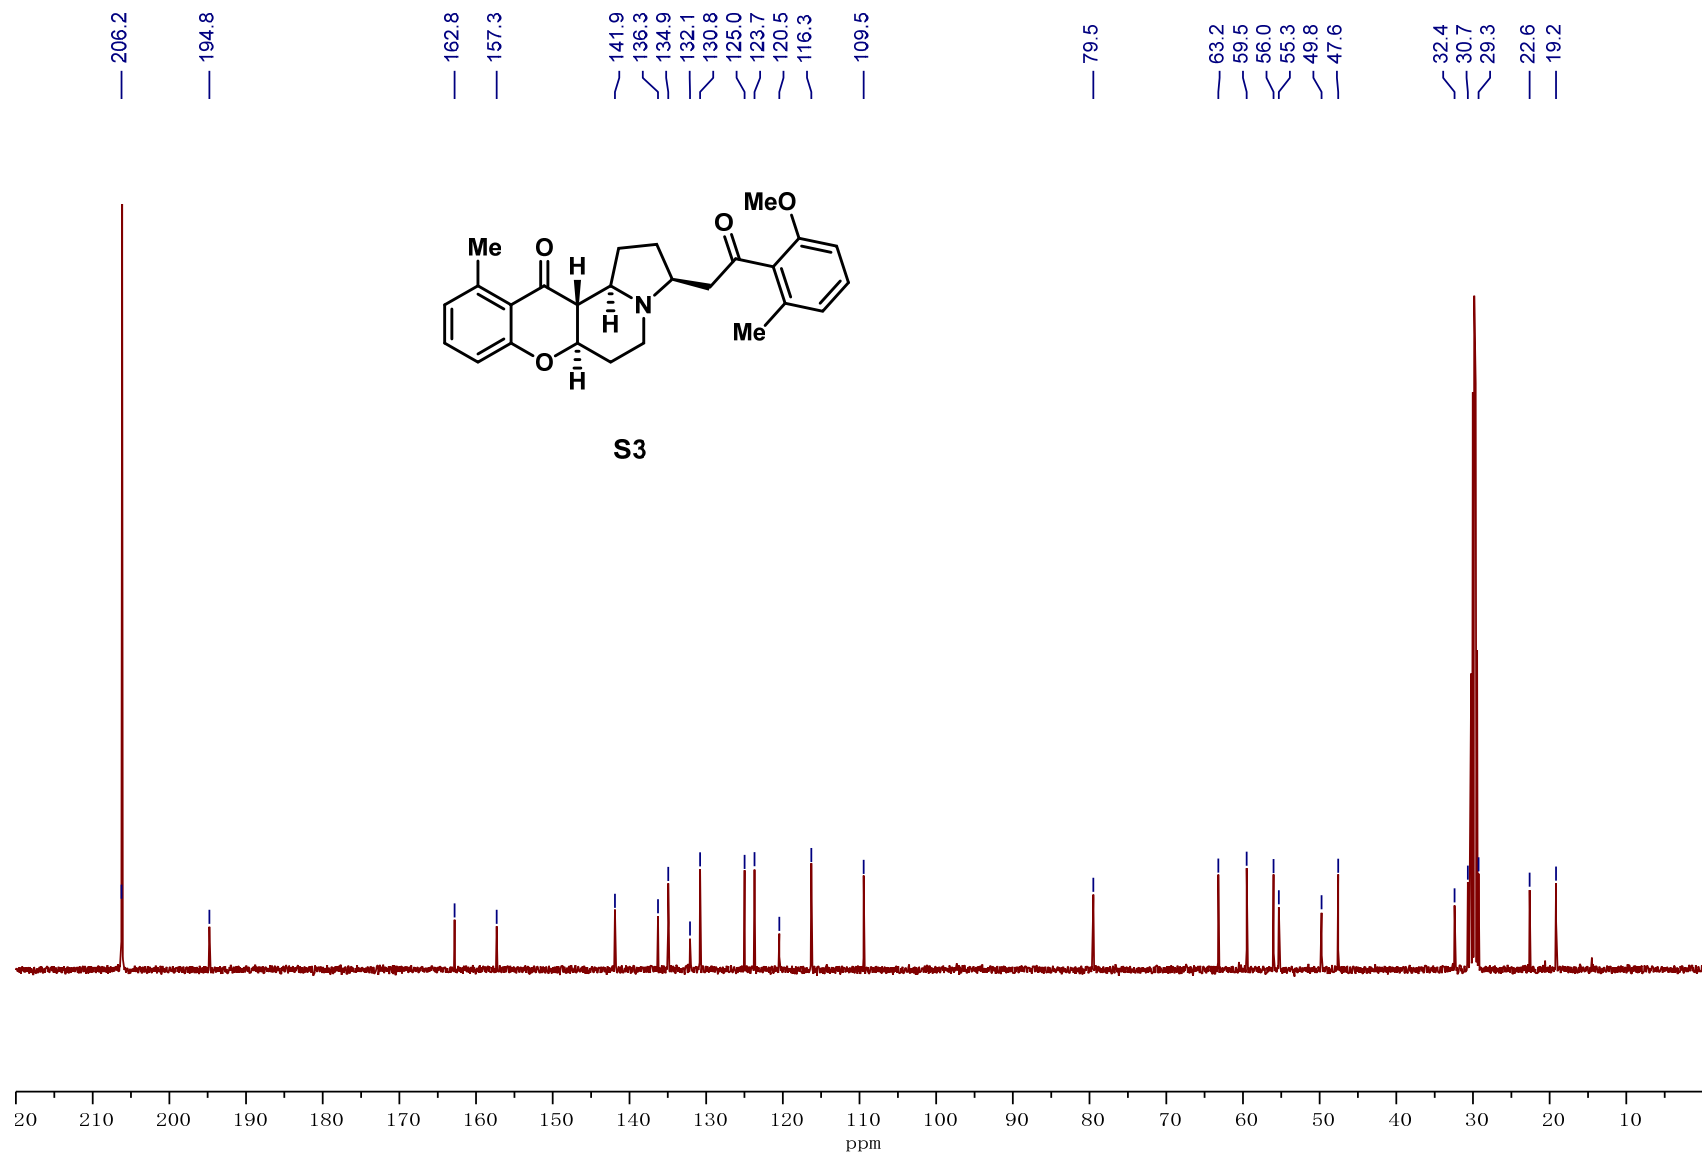

Compound S4 HSQC (Acetone-*d*<sub>6</sub>)

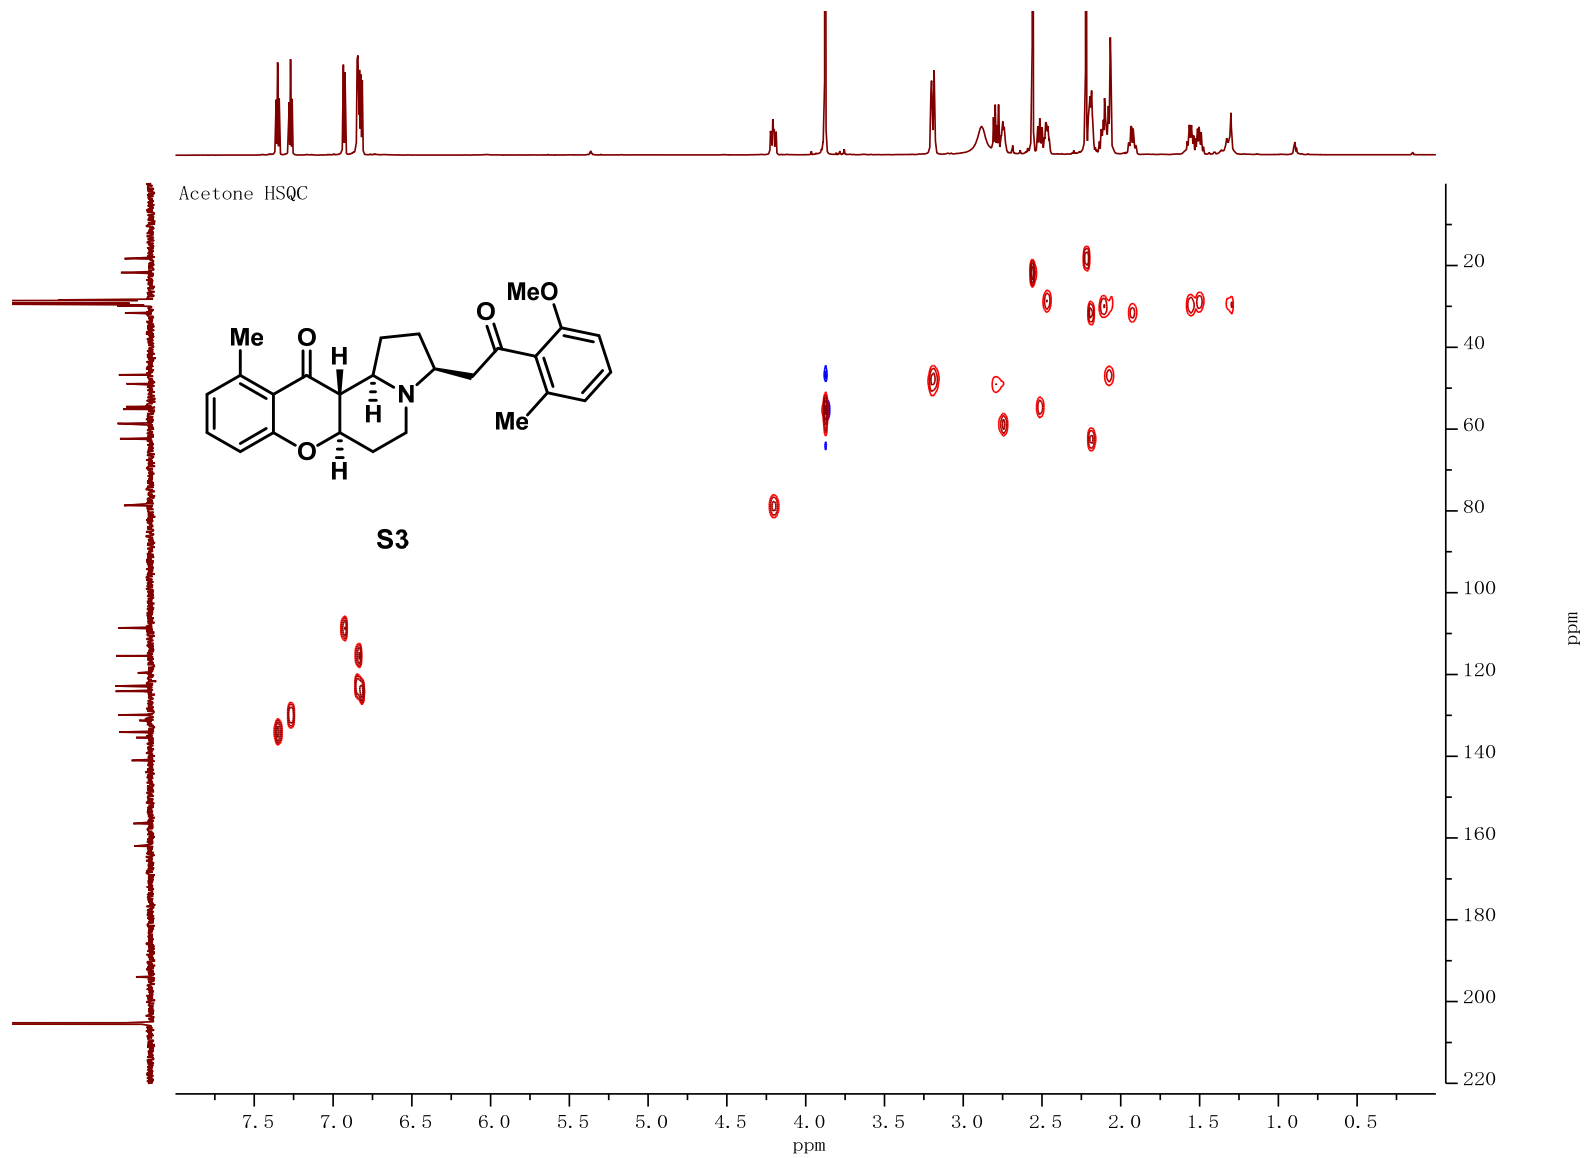

Compound S4 HMBC (Acetone-*d*<sub>6</sub>)

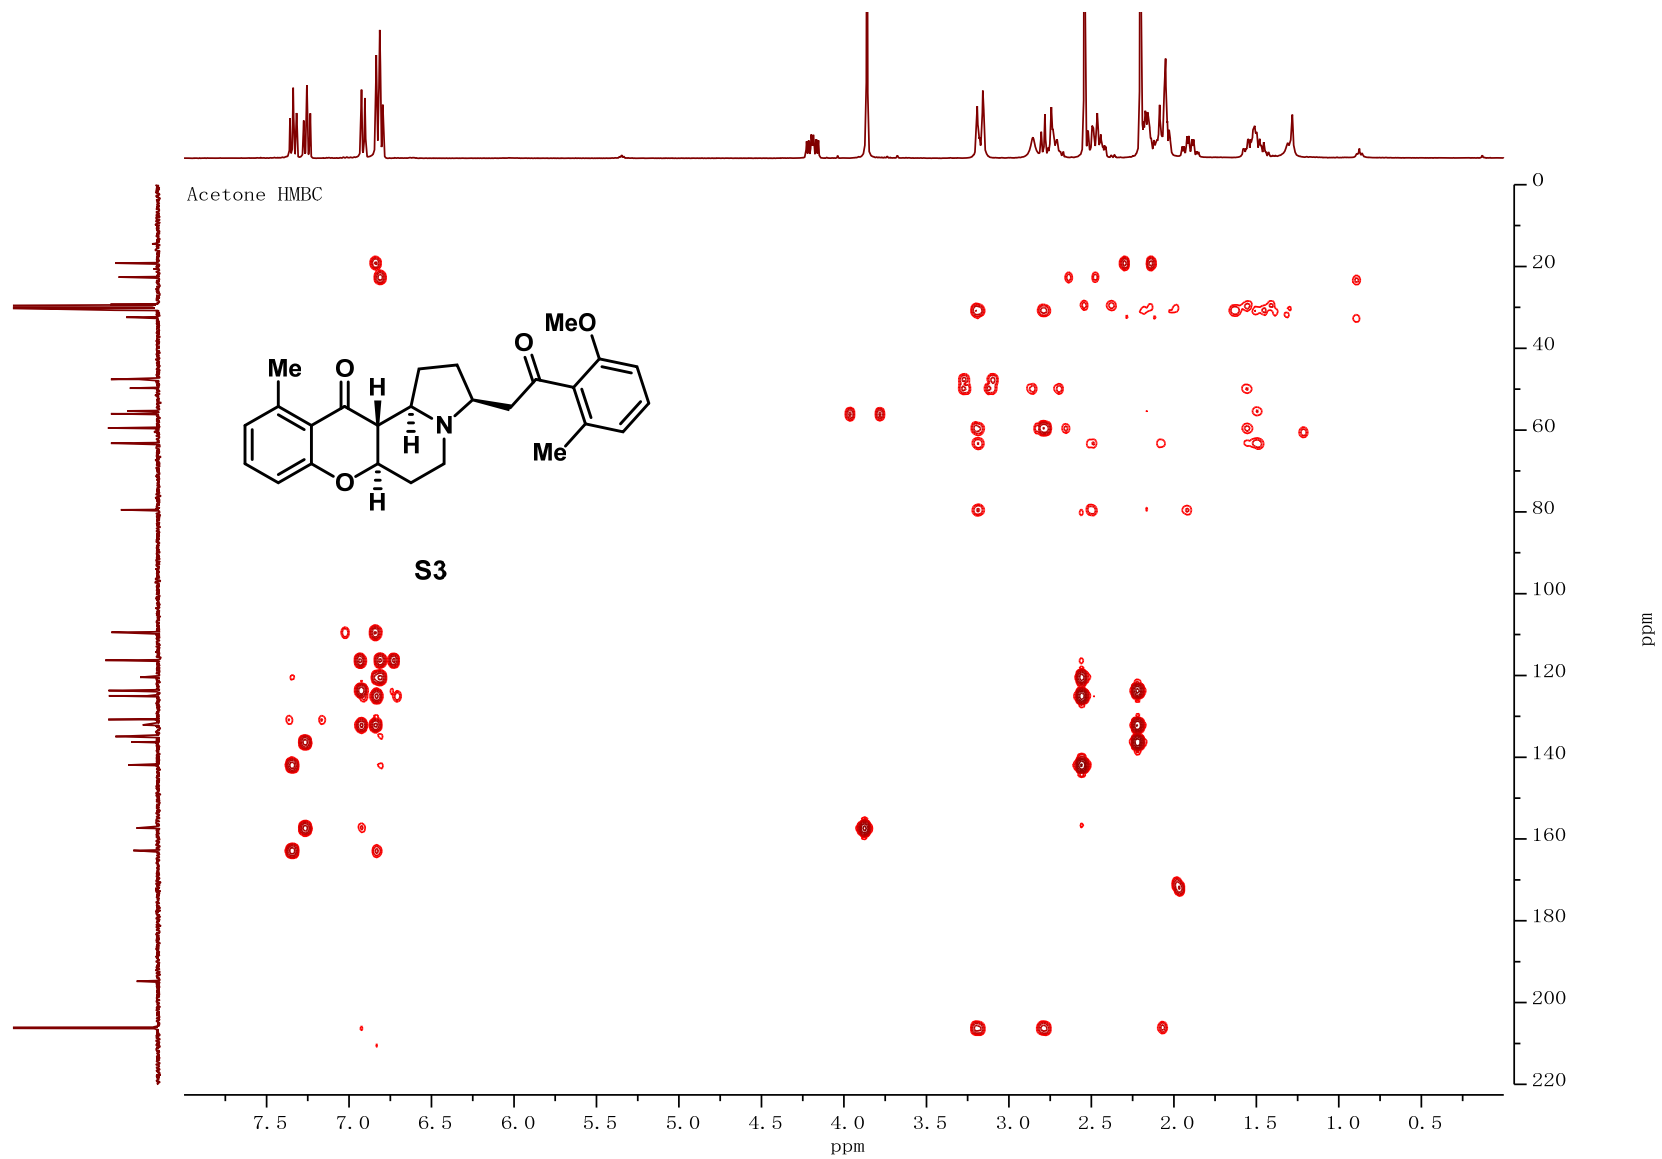

Compound S4 COSY (Acetone-*d*<sub>6</sub>)

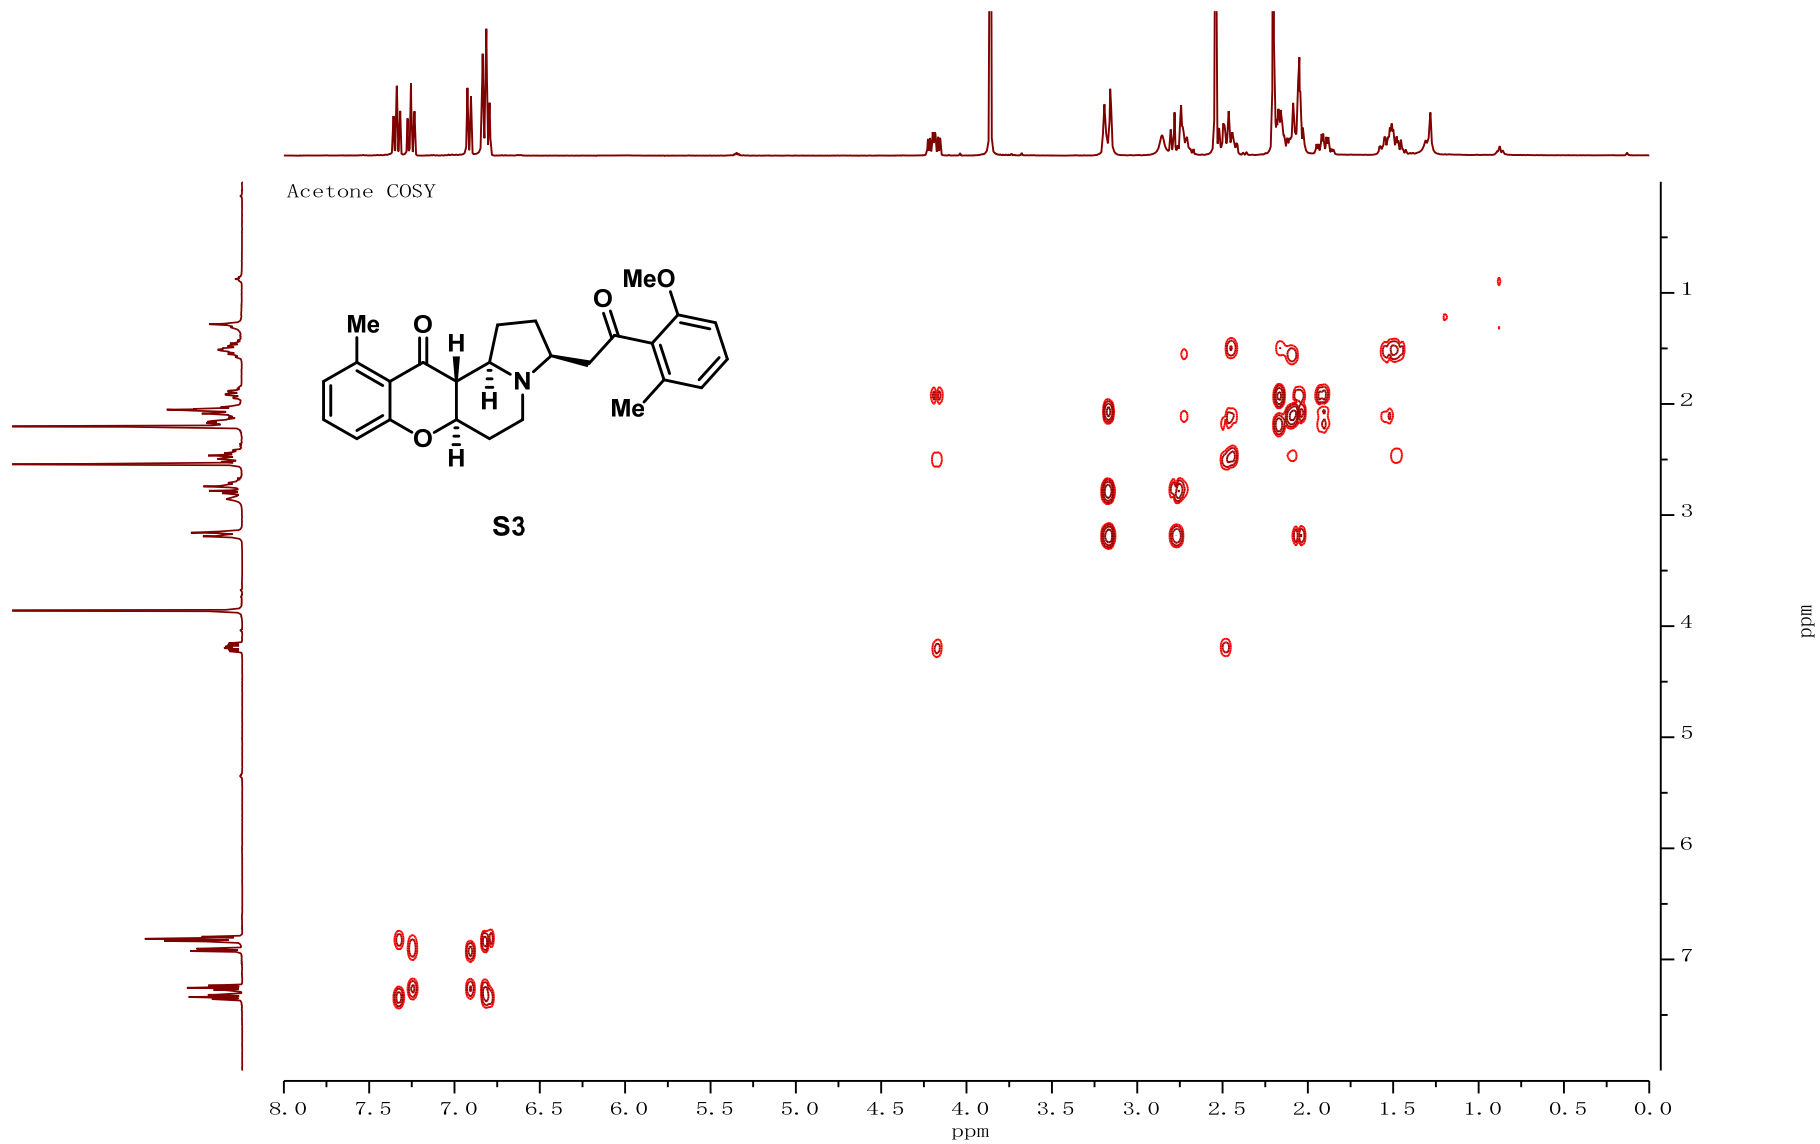

Compound S4 NOESY (Acetone-*d*<sub>6</sub>)

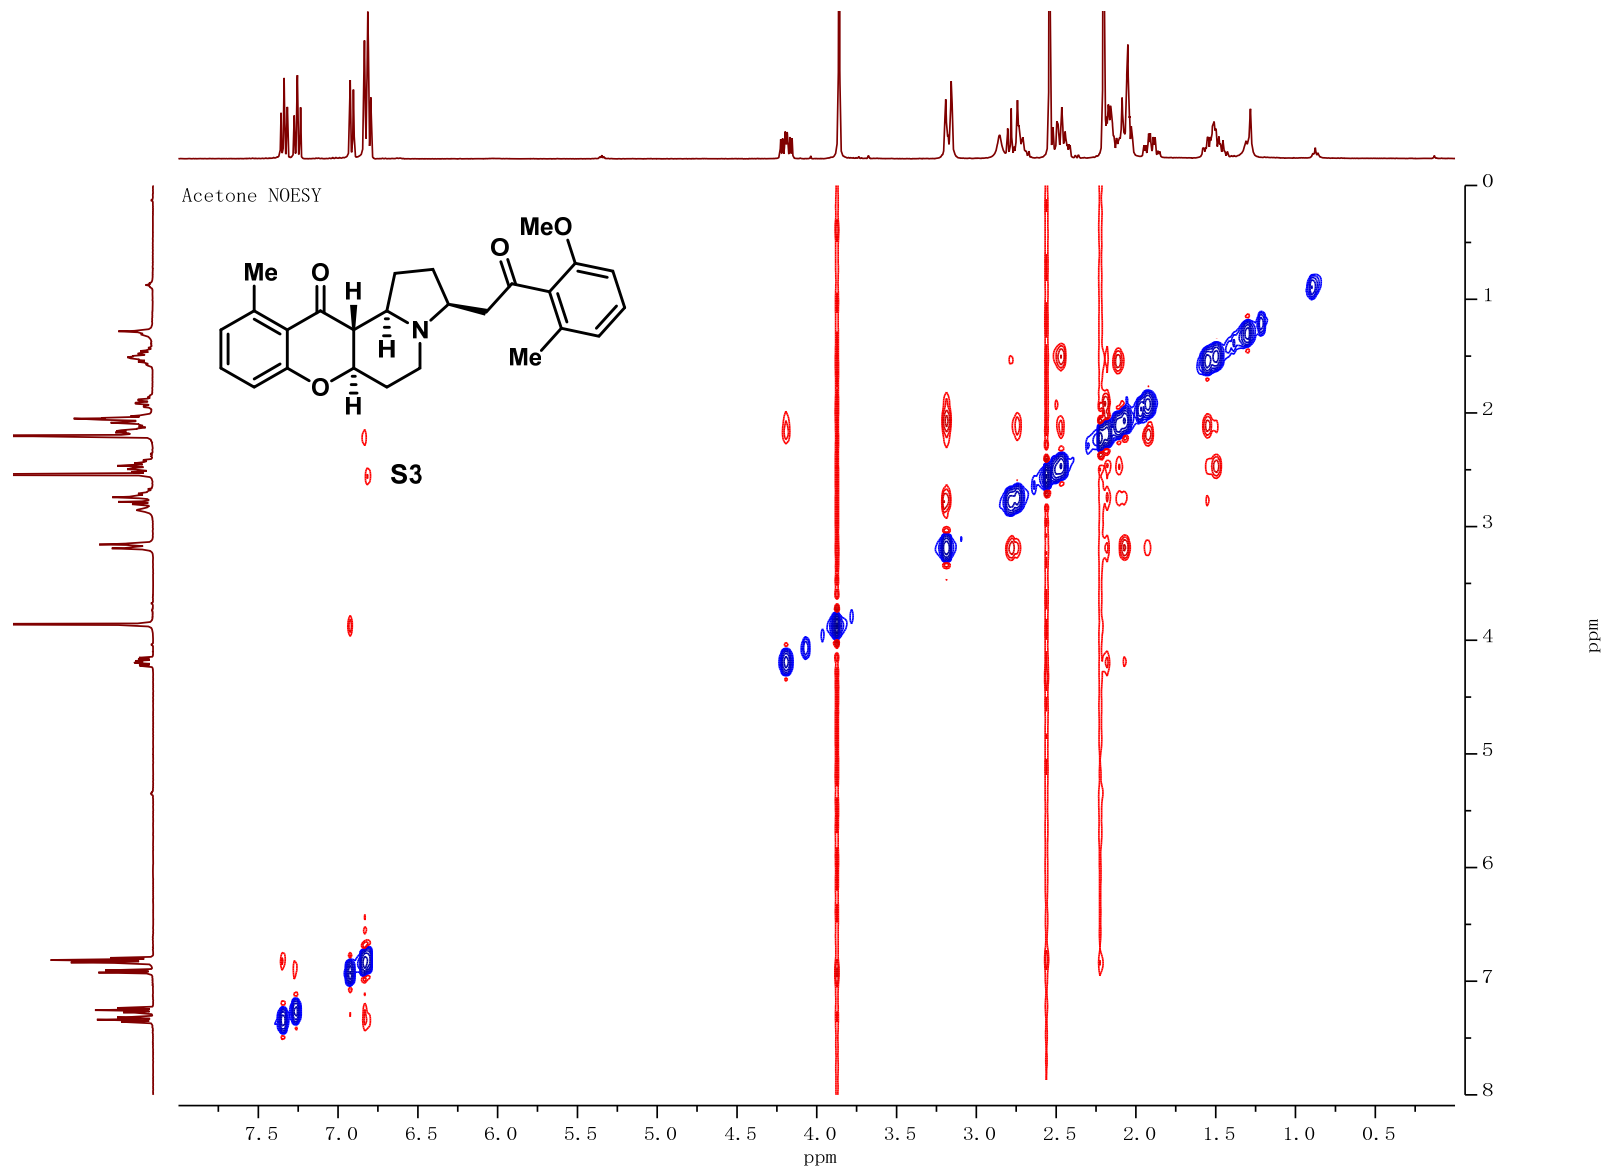

Compound 6 <sup>1</sup>H NMR (500 MHz, Acetone-*d*<sub>6</sub>)

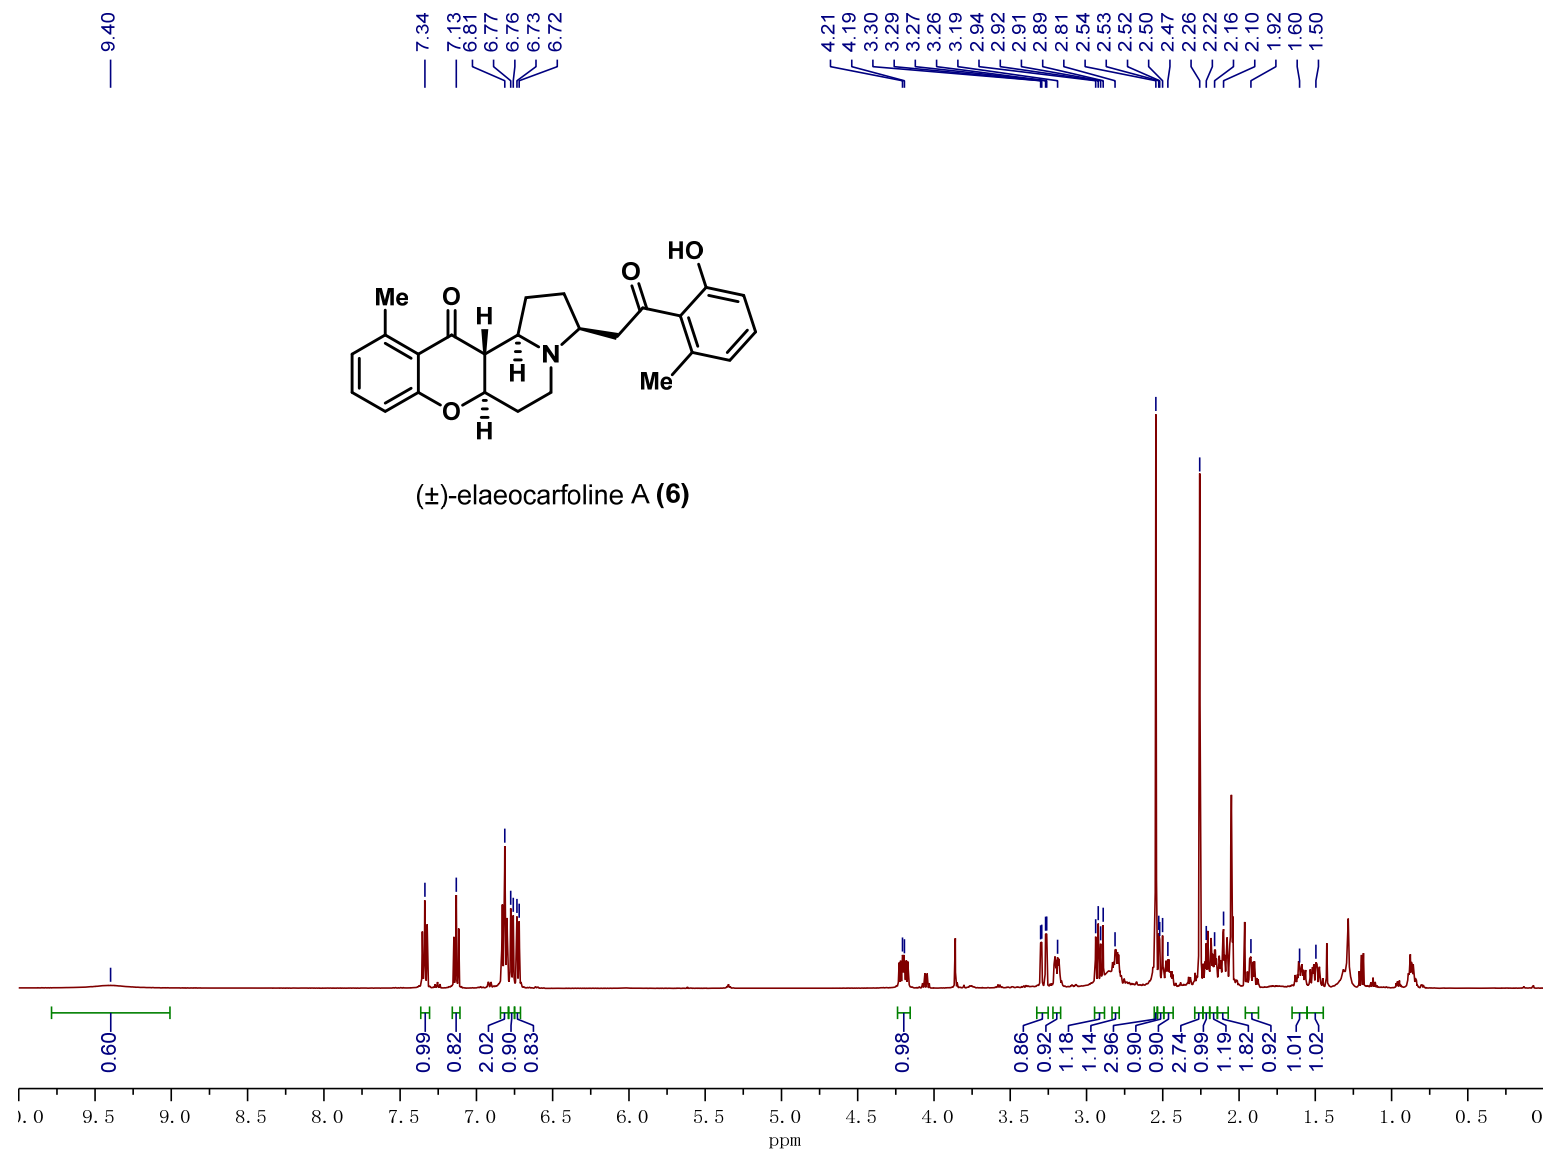



Compound 6  $^{13}\text{C}$  NMR (126 MHz, Acetone- $d_6$ )

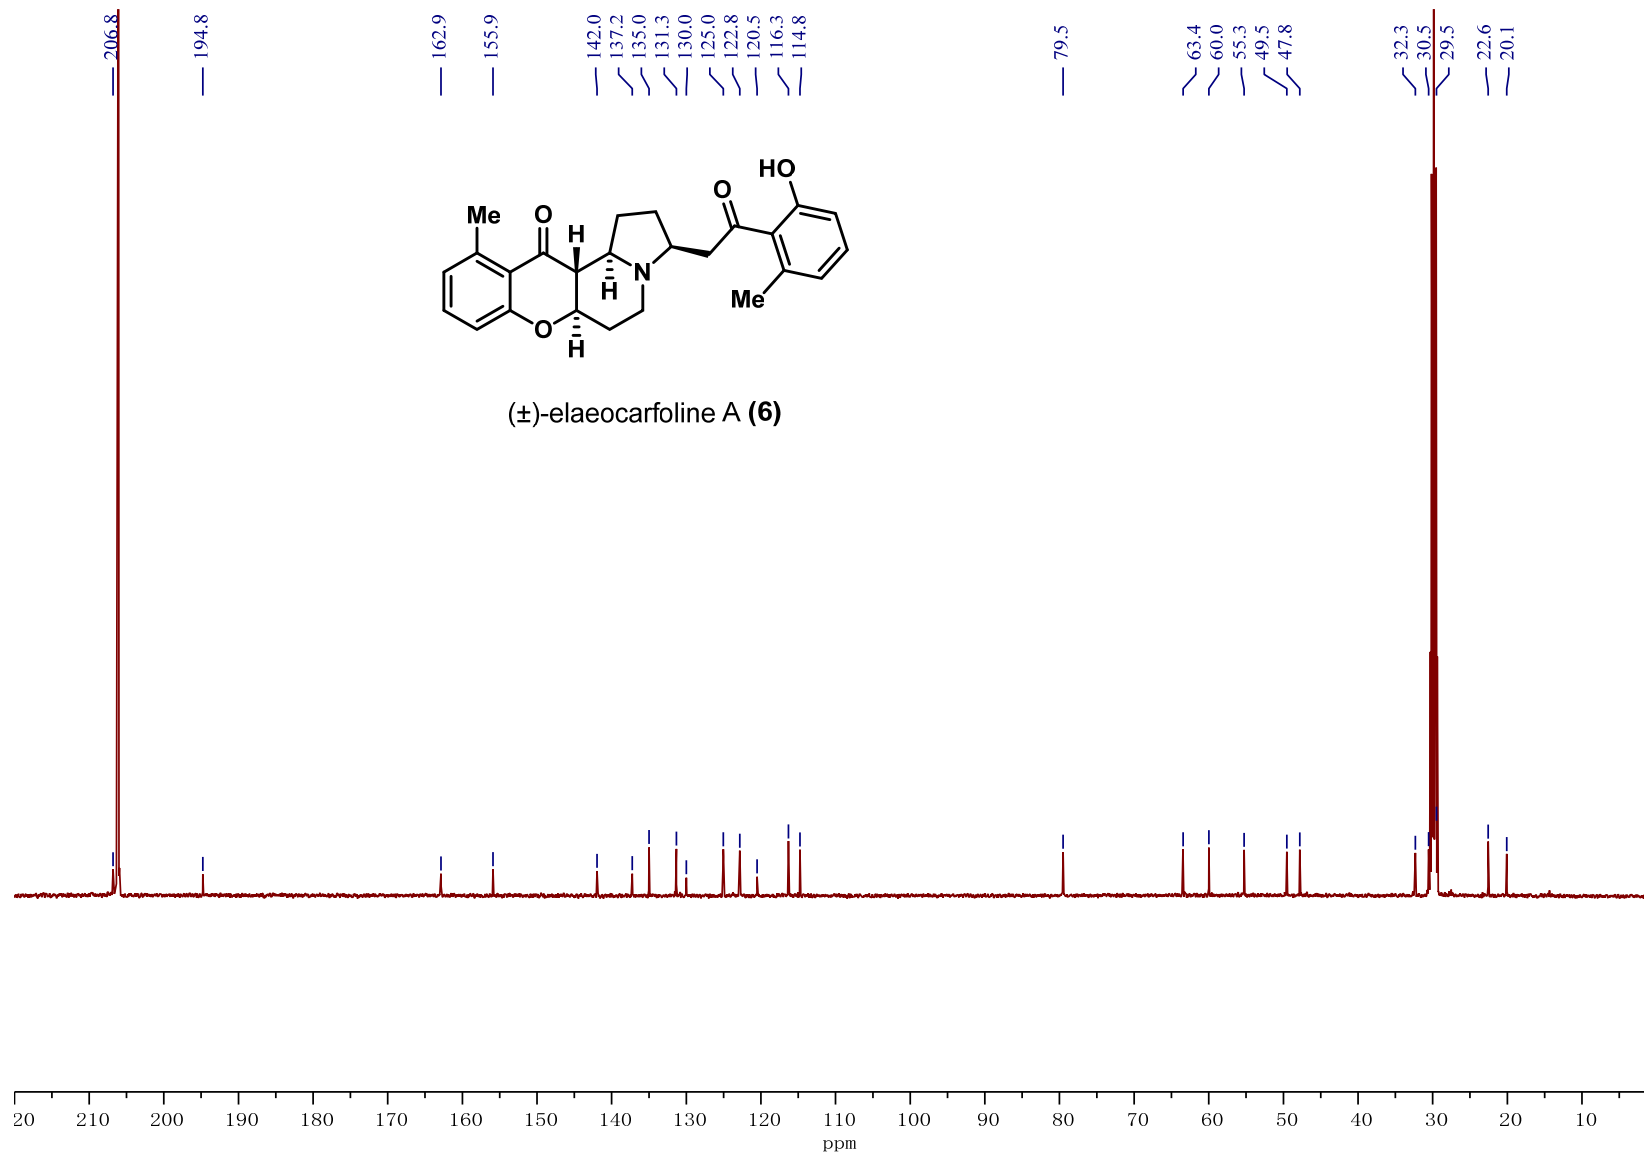

Compound 20  $^1\text{H}$  NMR (400 MHz, Chloroform-*d*)

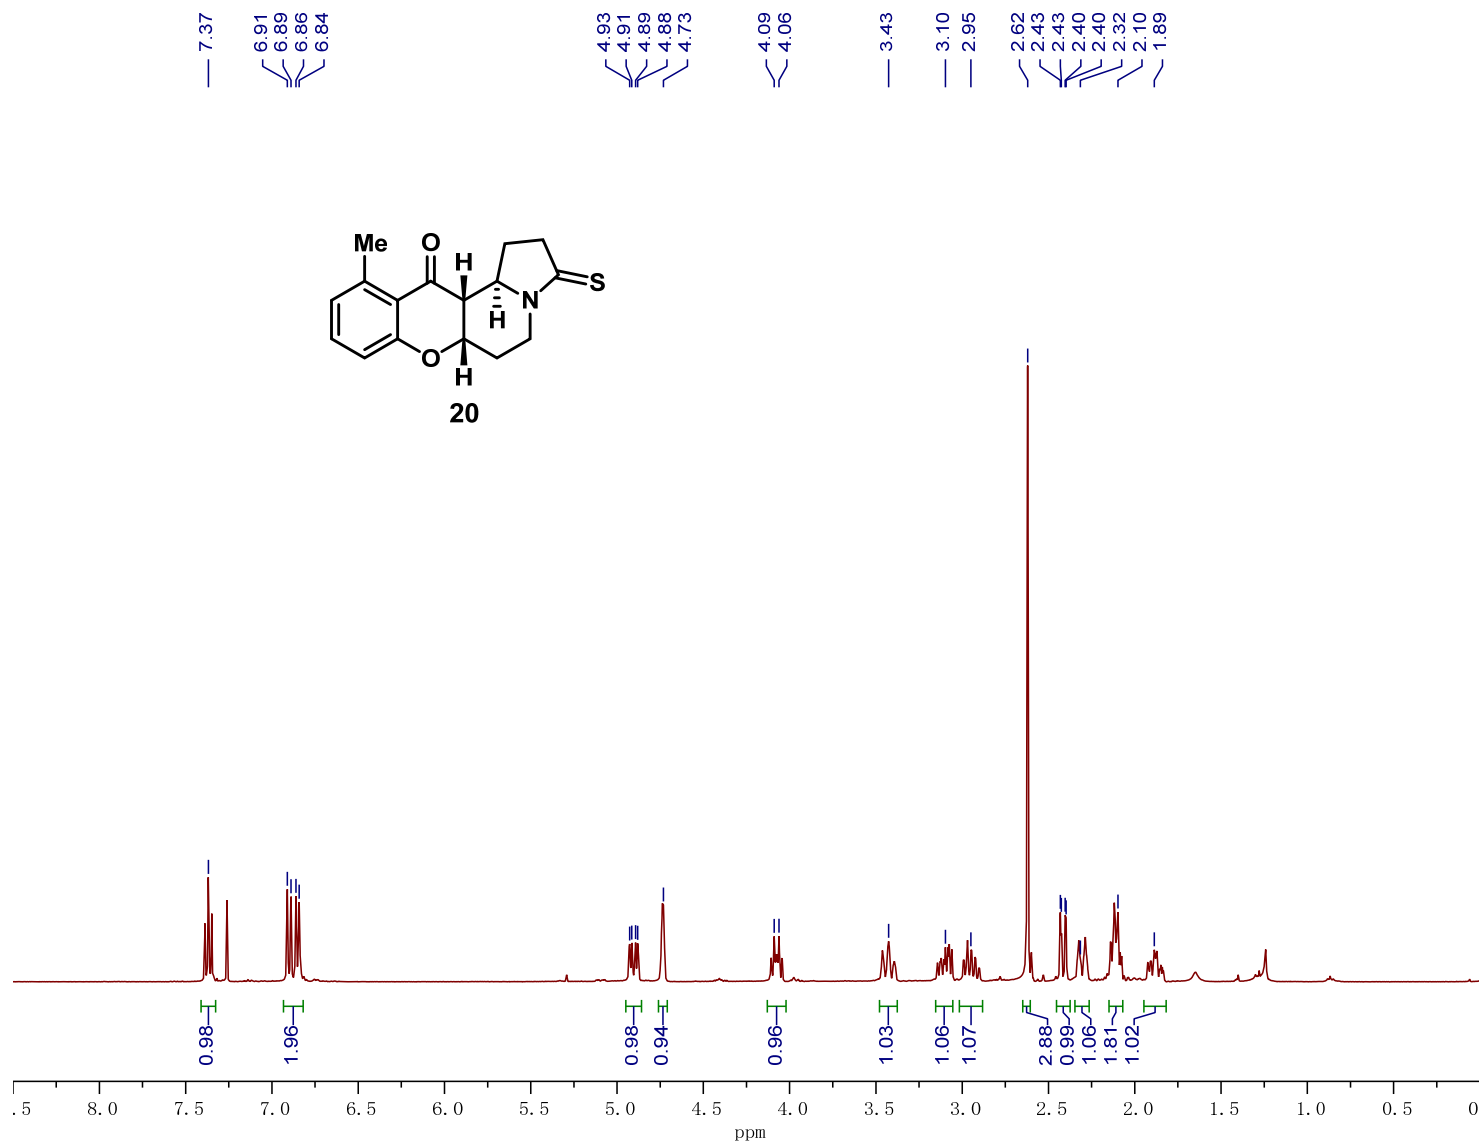

Compound 20 <sup>13</sup>C NMR (101 MHz, Chloroform-*d*)

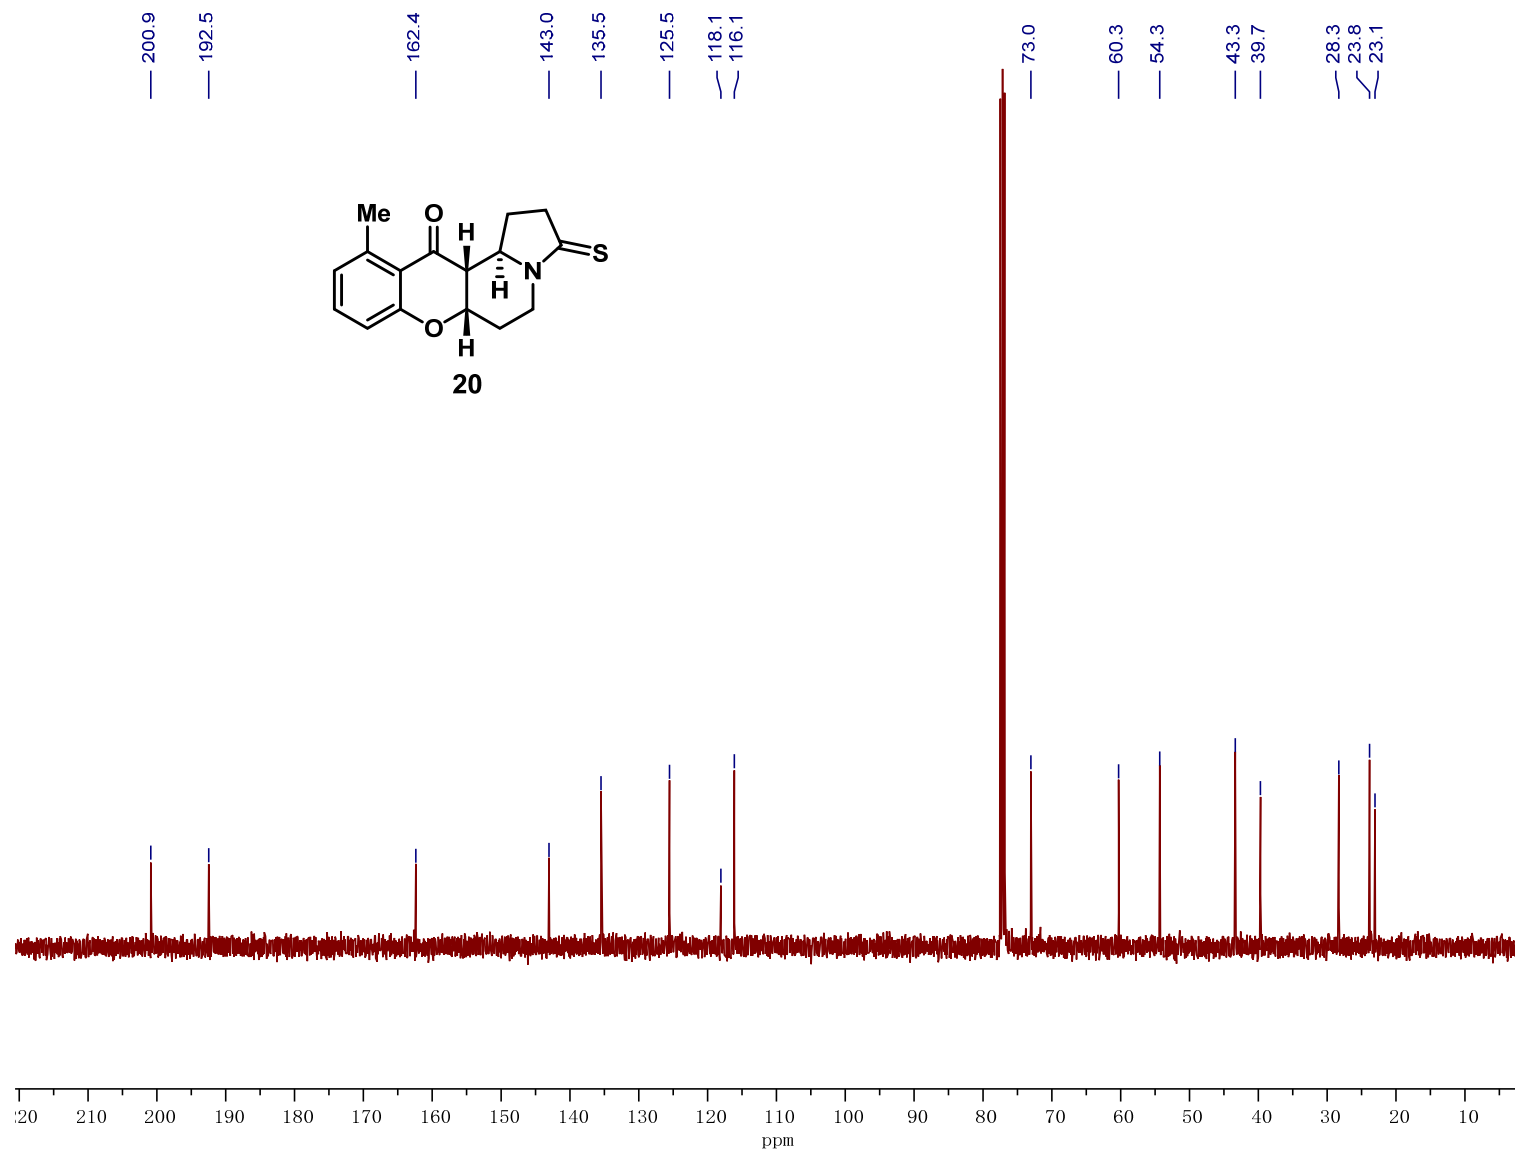

Compound 2 <sup>1</sup>H NMR (400 MHz, Methanol-d<sub>4</sub>)

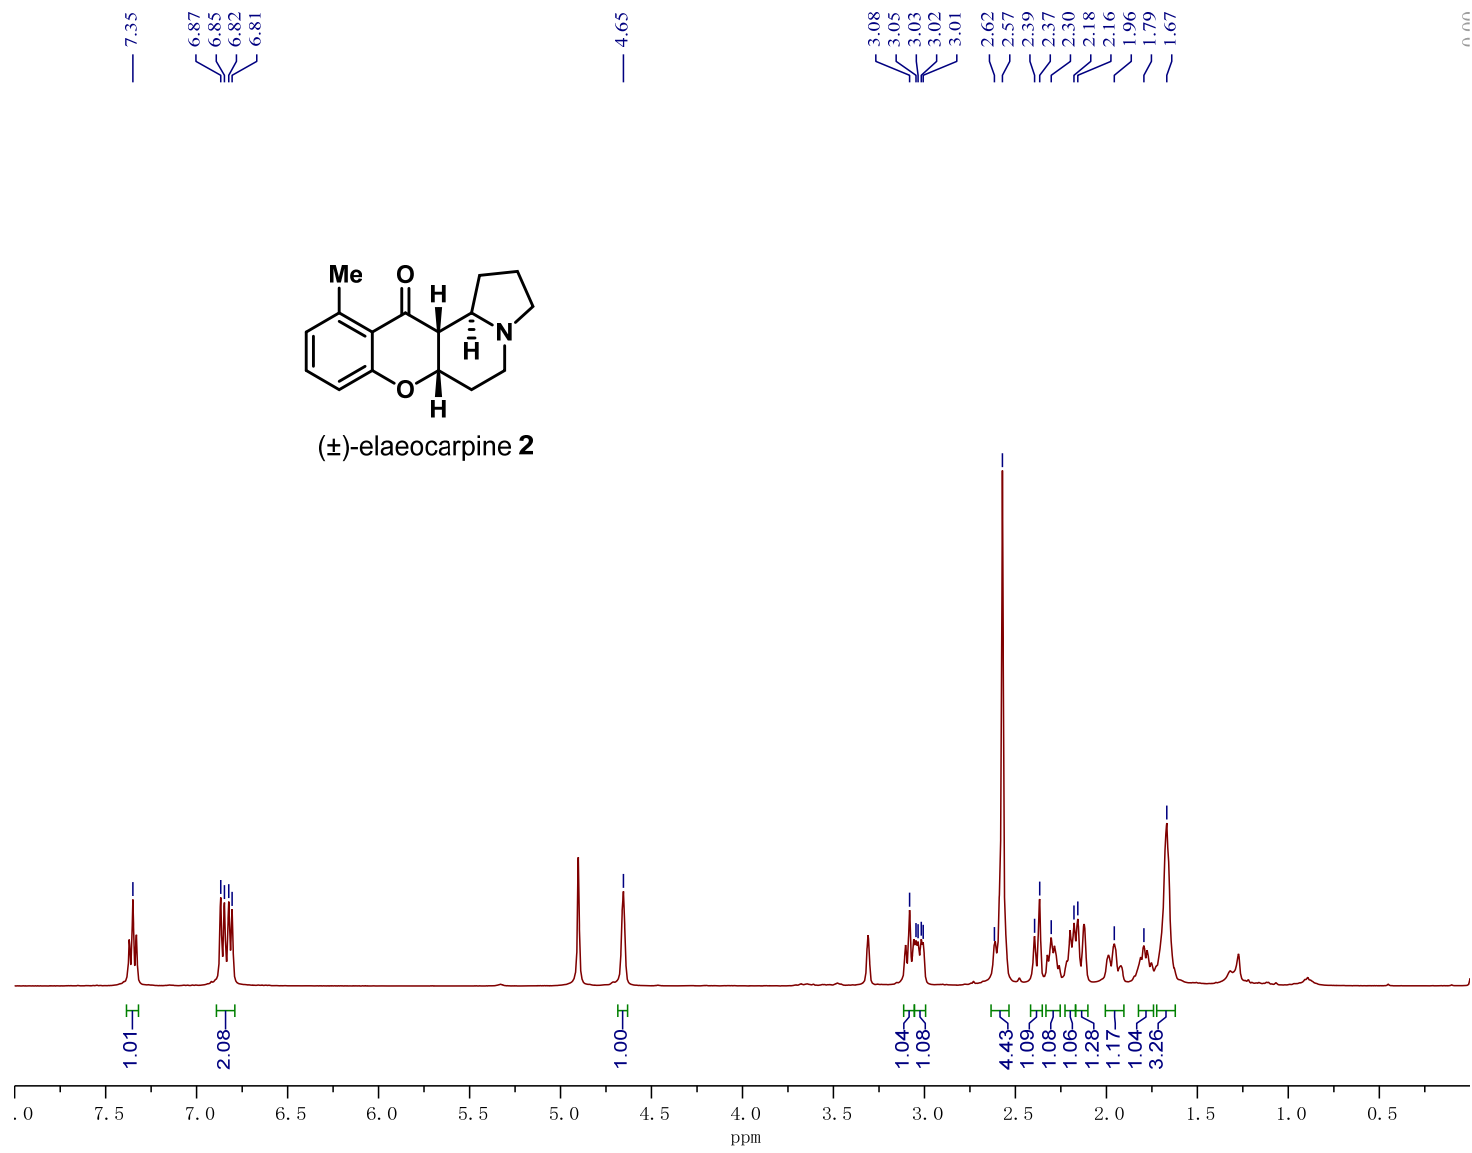

Compound 2 <sup>13</sup>C NMR (101 MHz, Methanol-*d*<sub>4</sub>)

195.9  
163.8  
143.3  
136.2  
125.8  
119.4  
117.0  
75.0  
60.2  
55.1  
54.5  
48.0  
30.5  
29.2  
23.1  
21.2

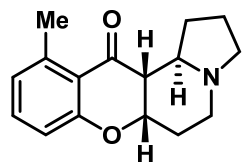

(±)-elaeocarpine 2

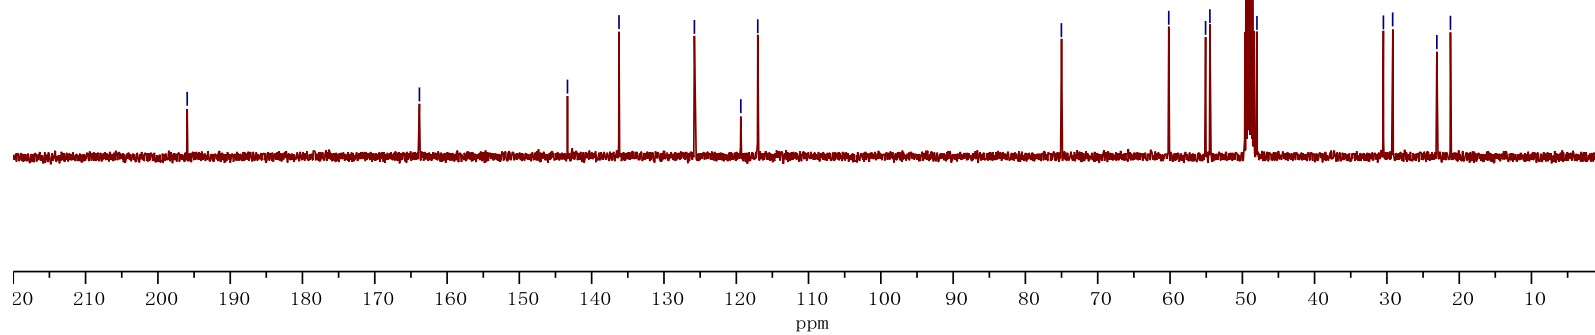

Compound S5 <sup>1</sup>H NMR (400 MHz, Chloroform-*d*)

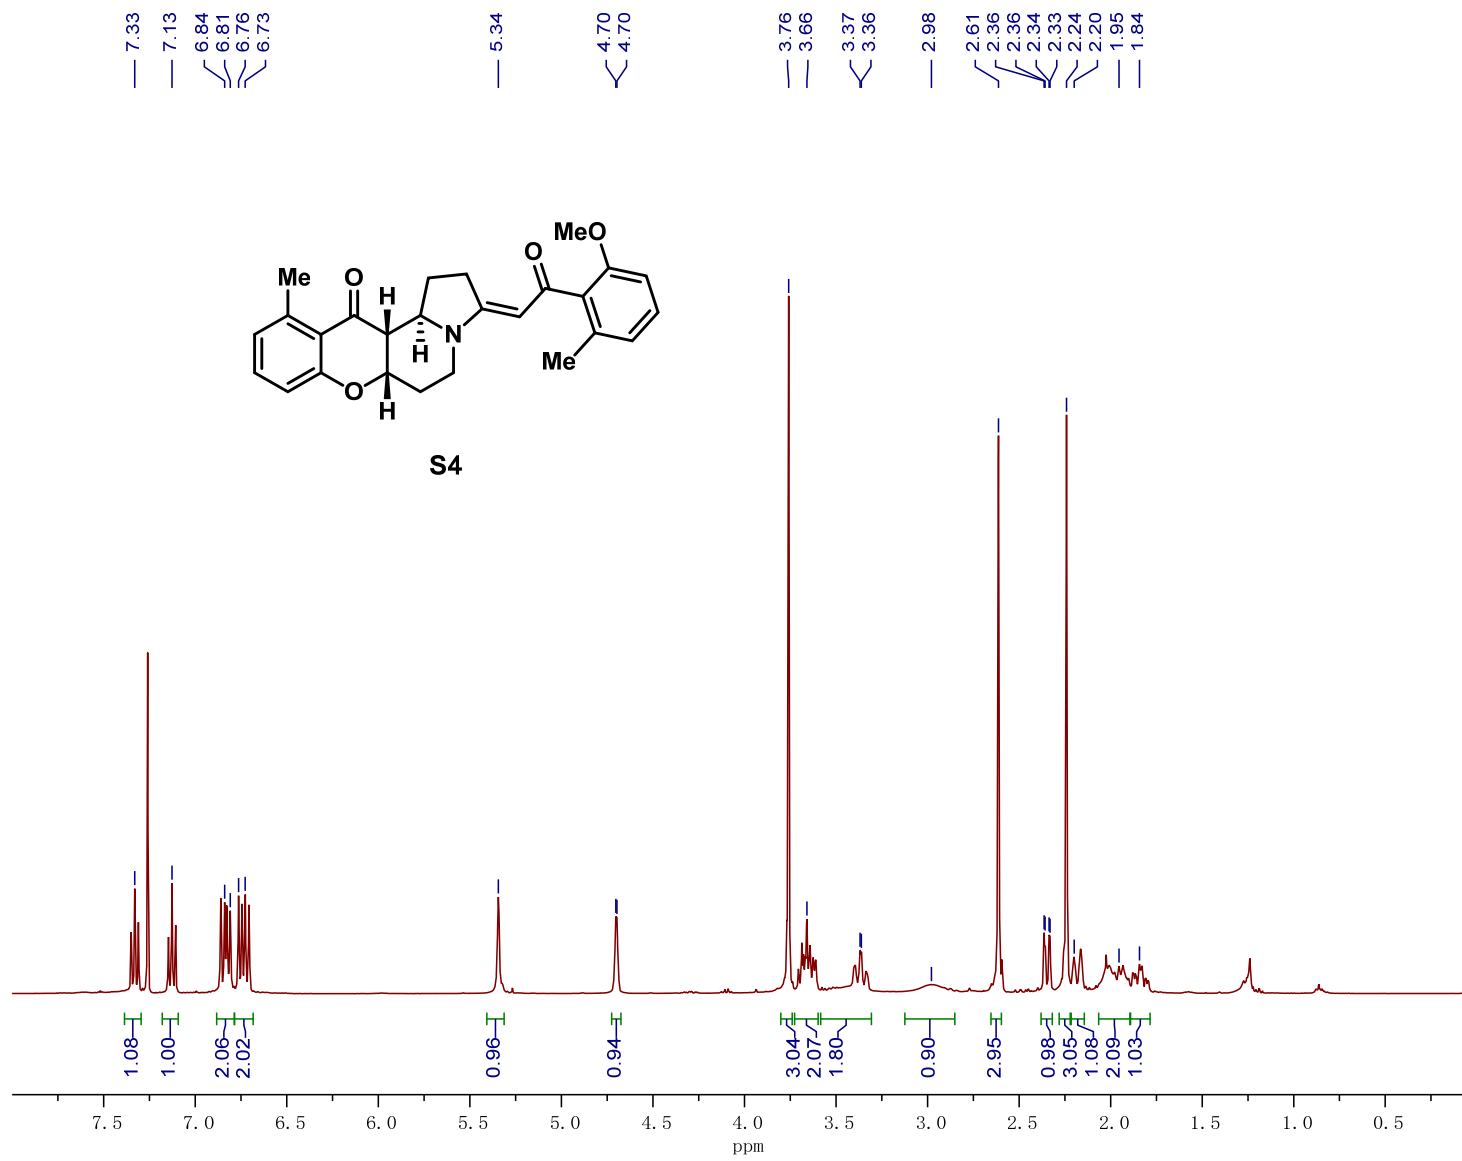

Compound S5 <sup>13</sup>C NMR (101 MHz, Chloroform-*d*)

193.2  
192.4

164.8  
162.2  
155.6

142.8  
135.3  
135.2  
134.5  
128.2  
125.3  
122.6  
118.1  
115.9

108.4

93.8

73.3

57.2  
55.8  
53.9

38.1

31.8  
28.0  
25.5  
23.0  
19.1

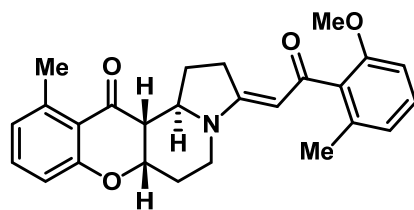

S4

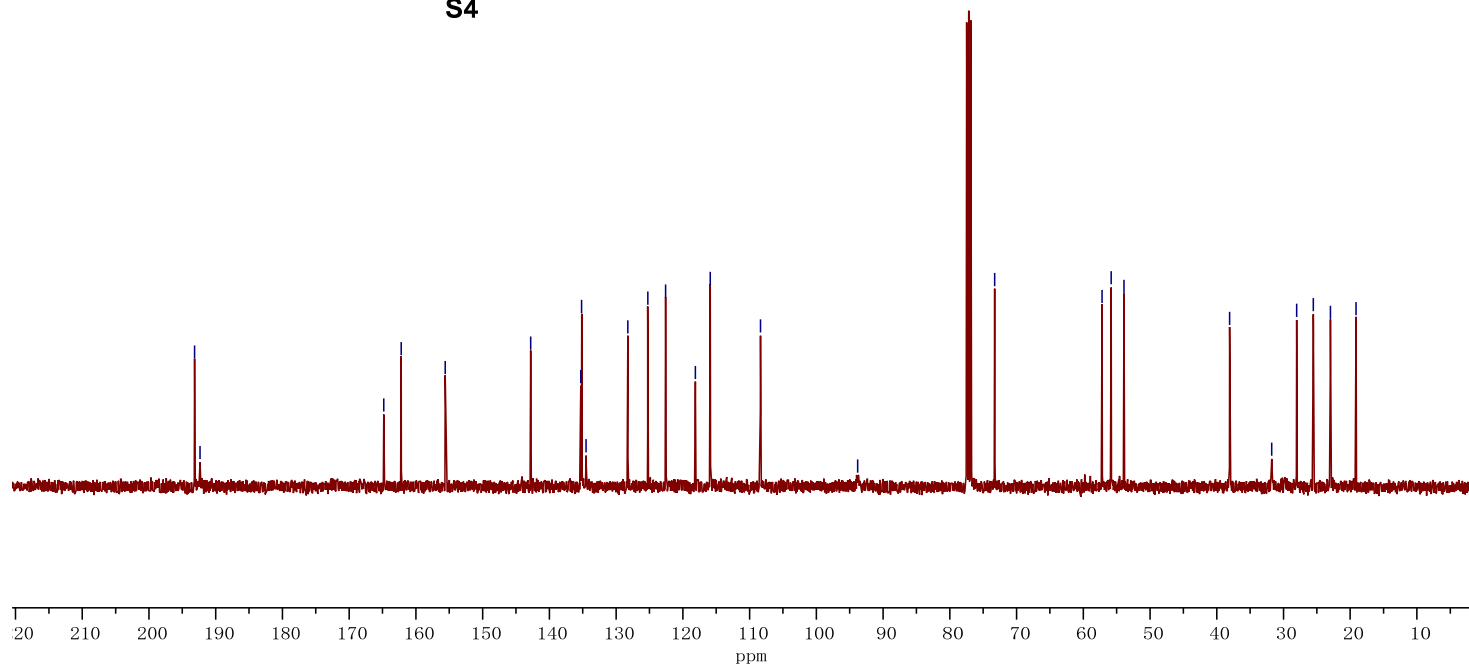

Compound S6 <sup>1</sup>H NMR (400 MHz, Acetone-*d*<sub>6</sub>)

7.37  
7.25  
6.92  
6.88  
6.83  
6.81

4.68

3.86

3.17  
3.03  
3.02  
2.86  
2.79  
2.73  
2.56  
2.39  
2.32  
2.19  
2.11  
2.11  
2.08  
2.07  
1.94  
1.85  
1.56  
1.52  
1.47

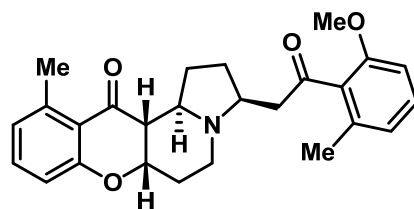

S5

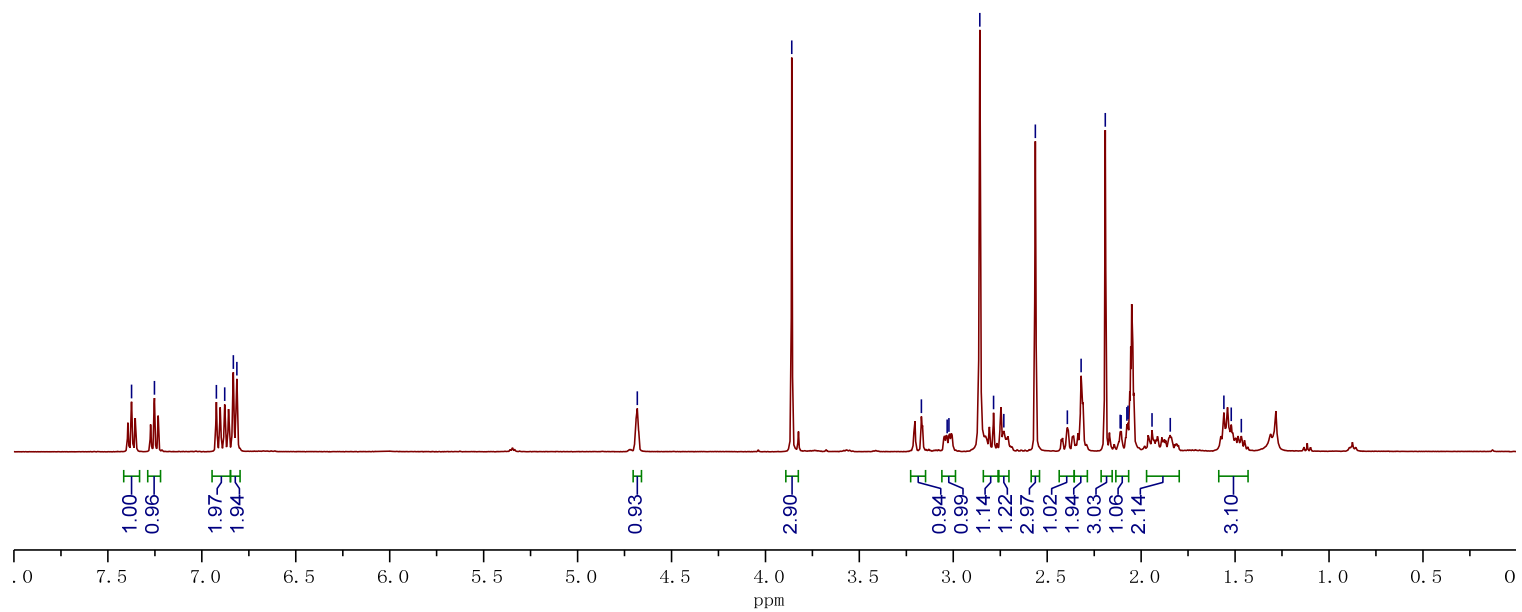



Compound S6 <sup>13</sup>C NMR (101 MHz, Acetone-*d*<sub>6</sub>)

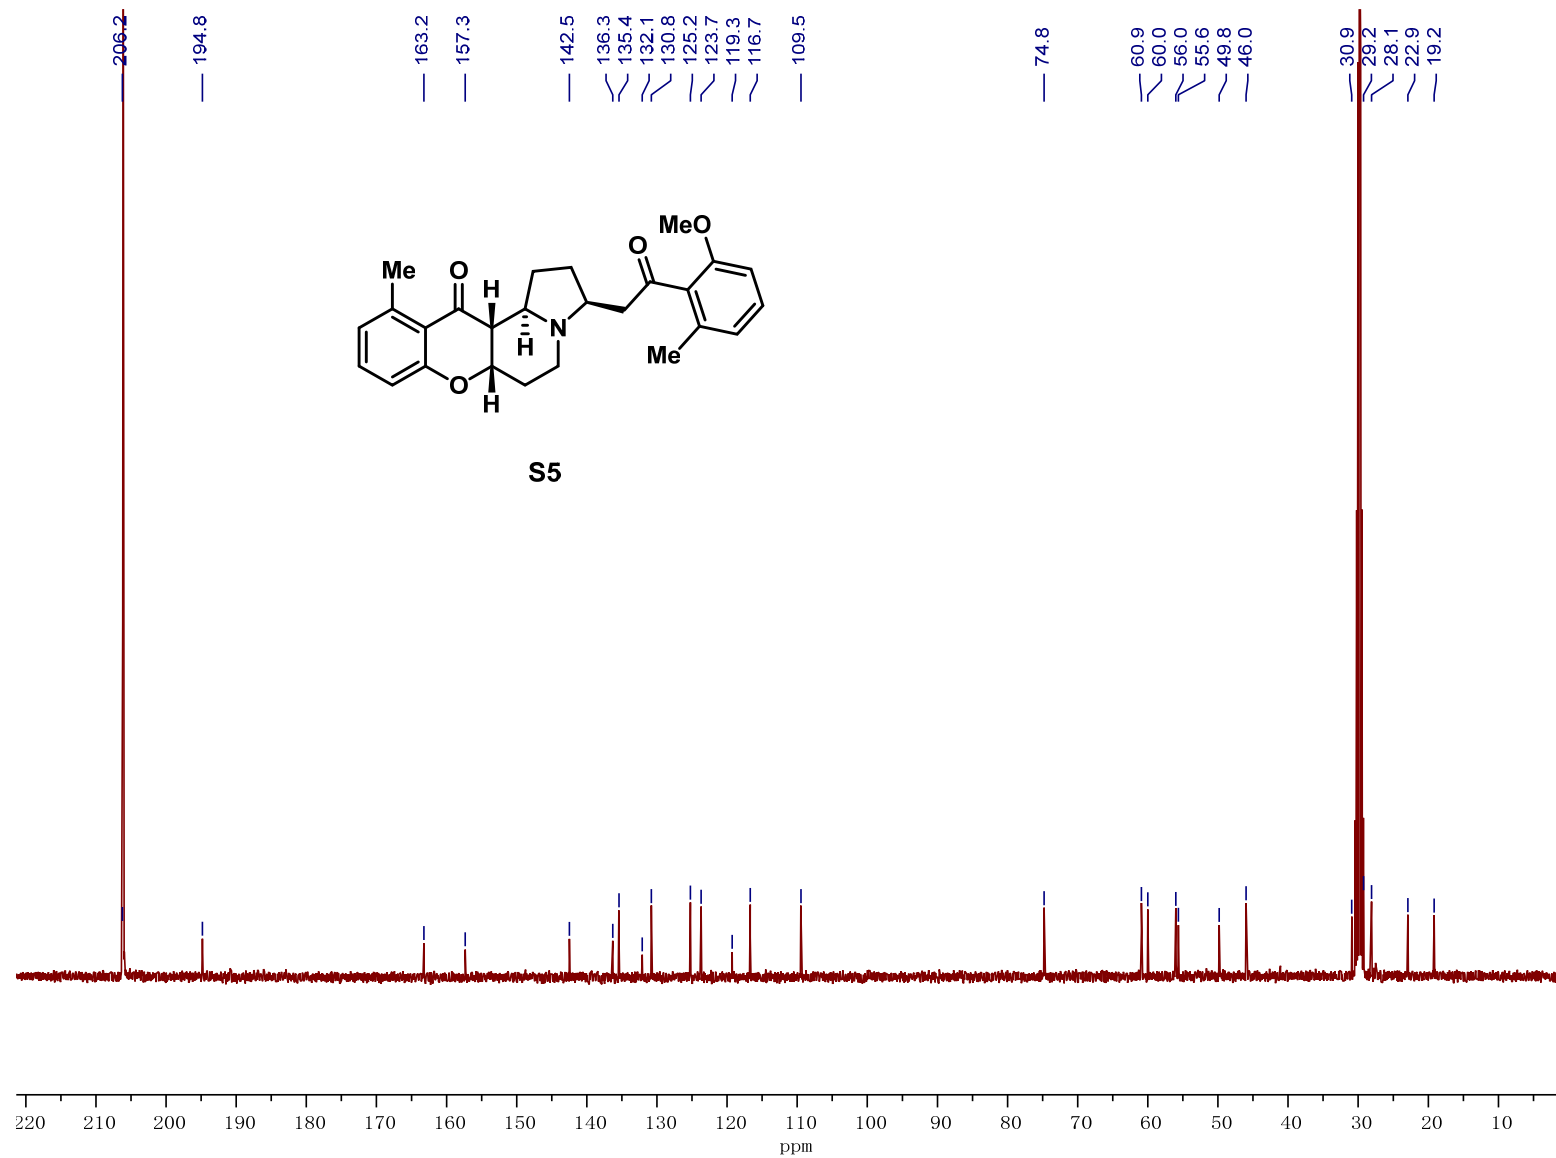

Compound S6 HSQC (Acetone-*d*<sub>6</sub>)

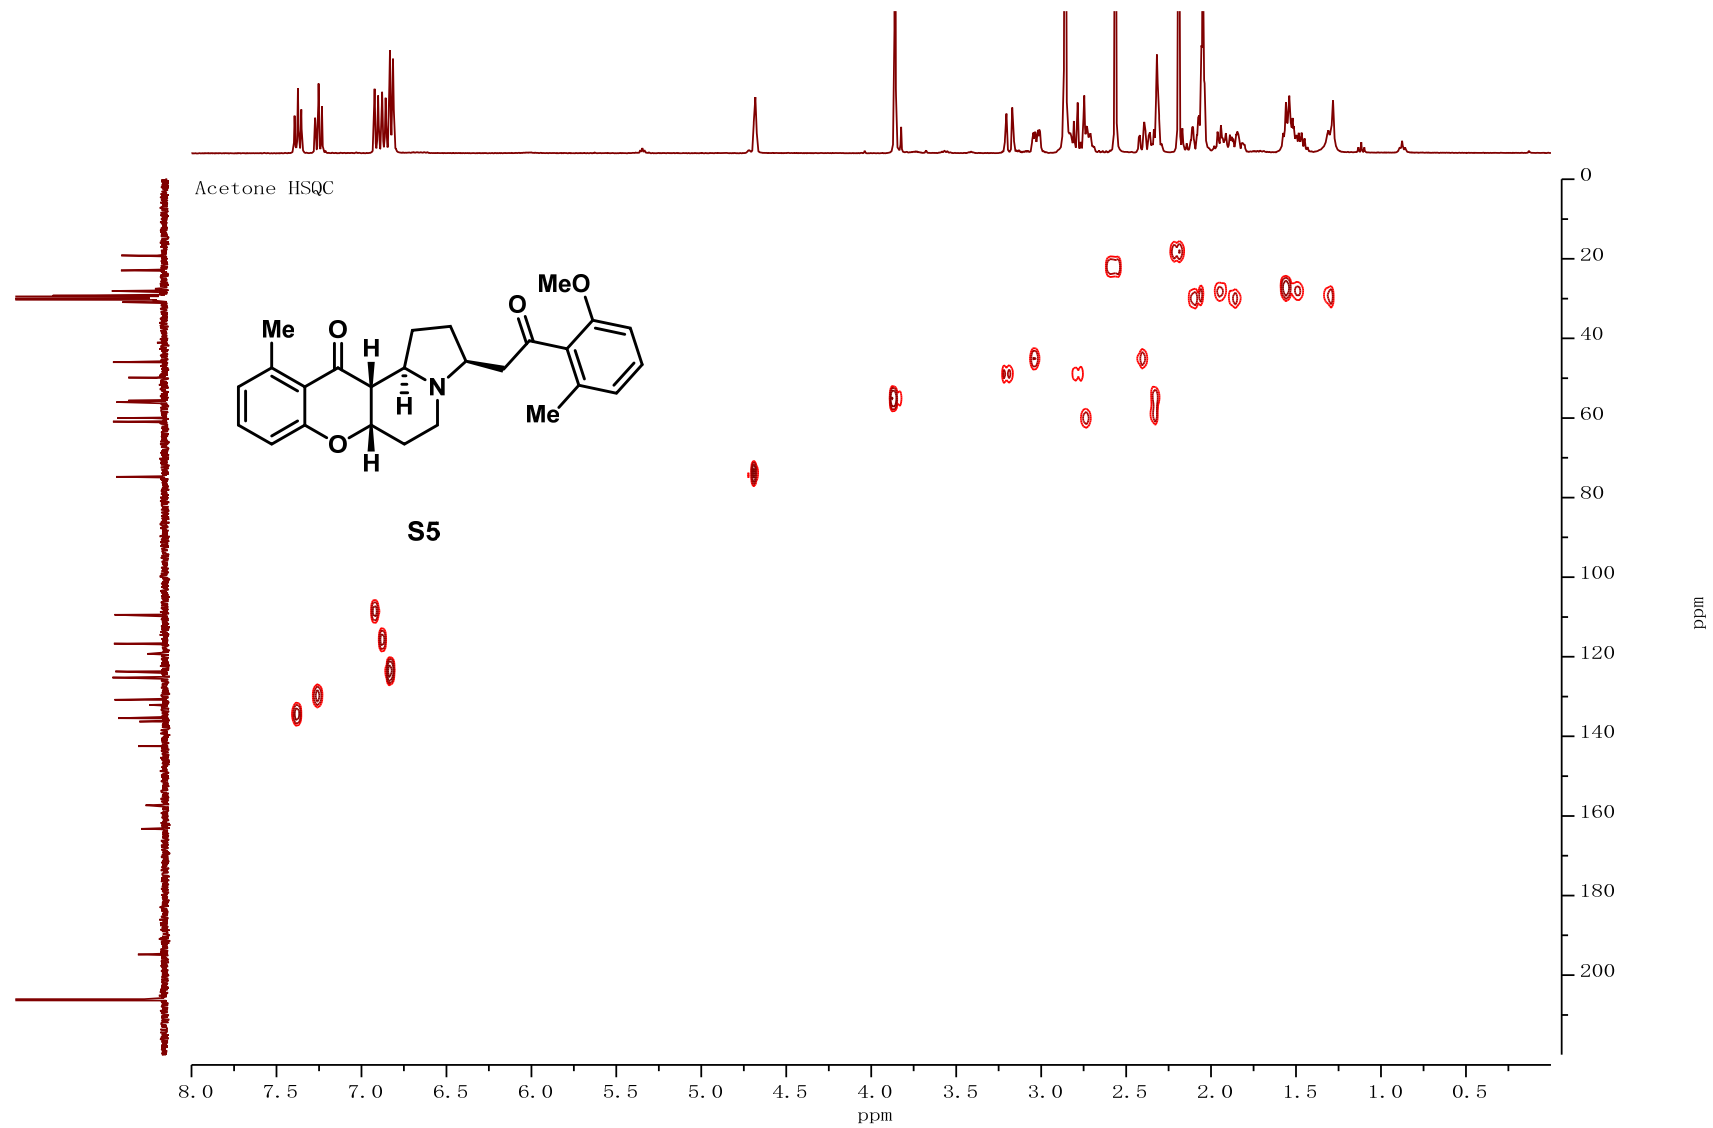

Compound S6 COSY (Acetone-*d*<sub>6</sub>)

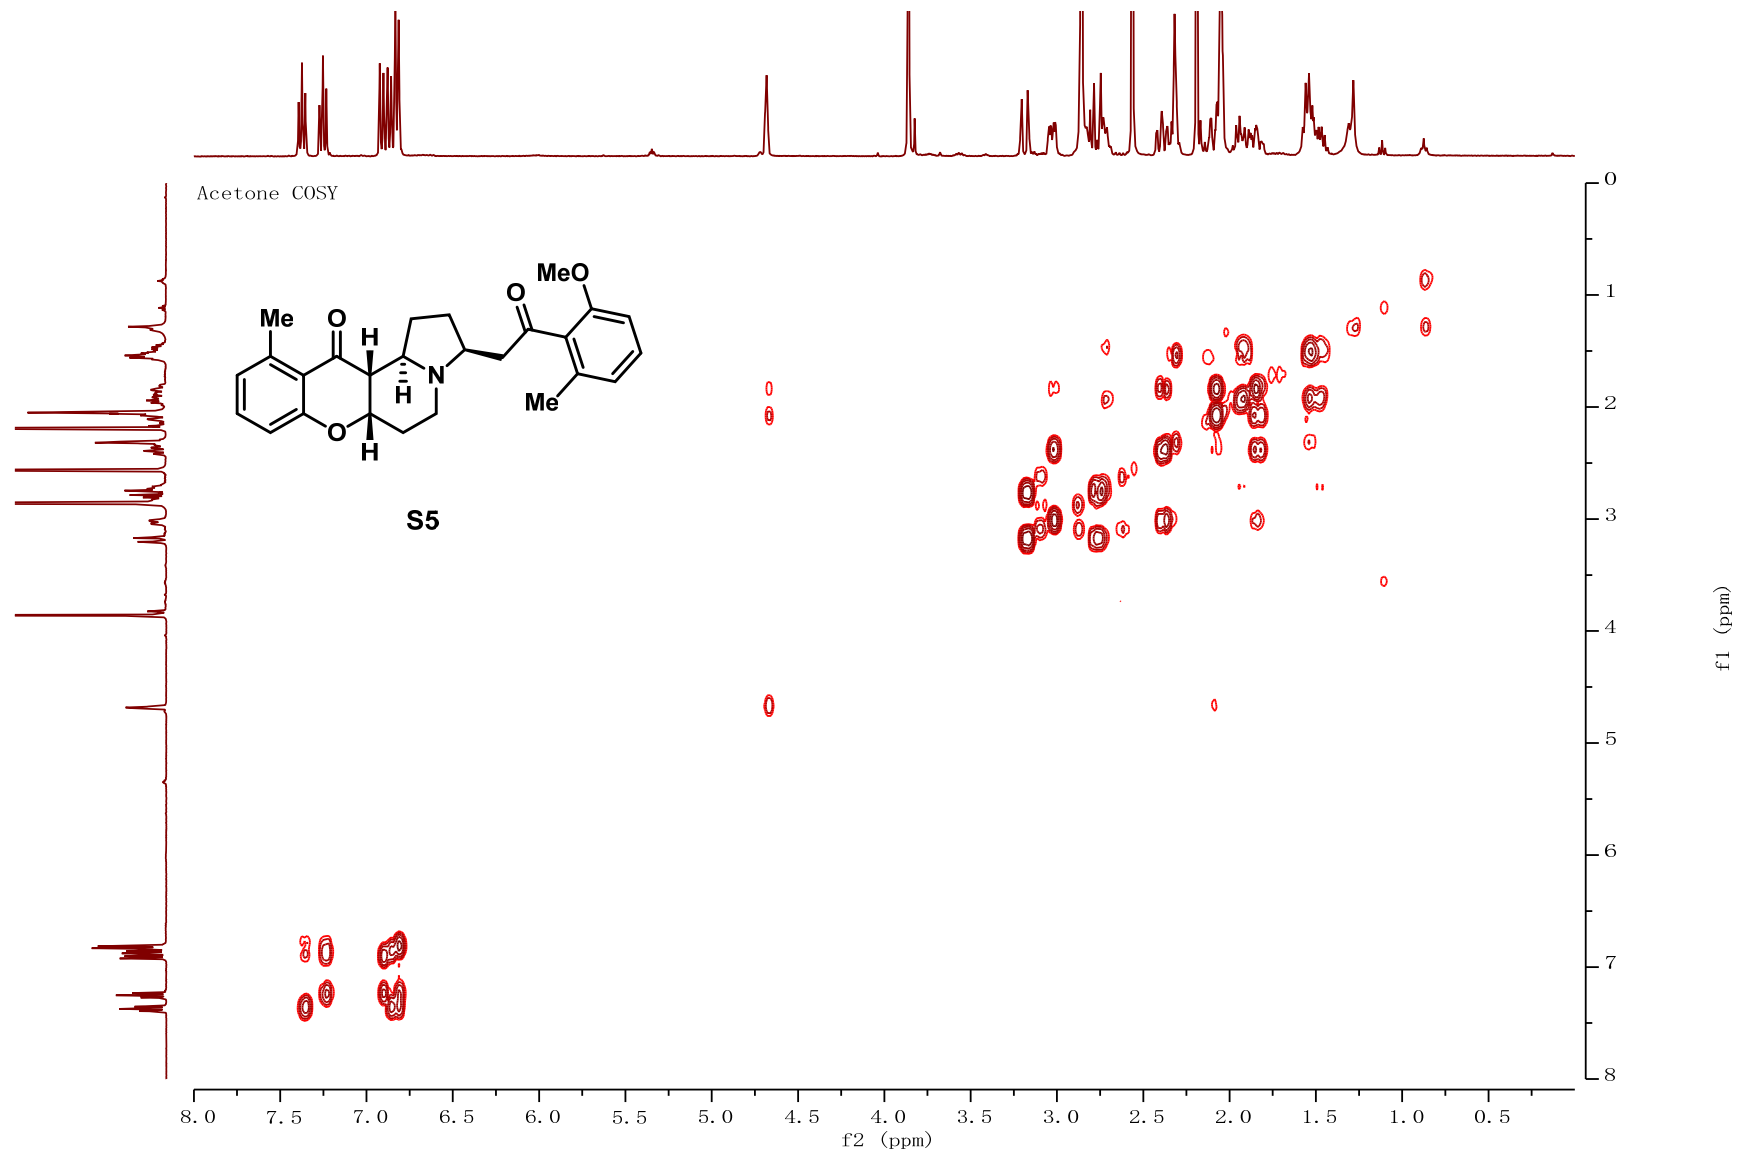

Compound S6 NOESY (Acetone-*d*<sub>6</sub>)

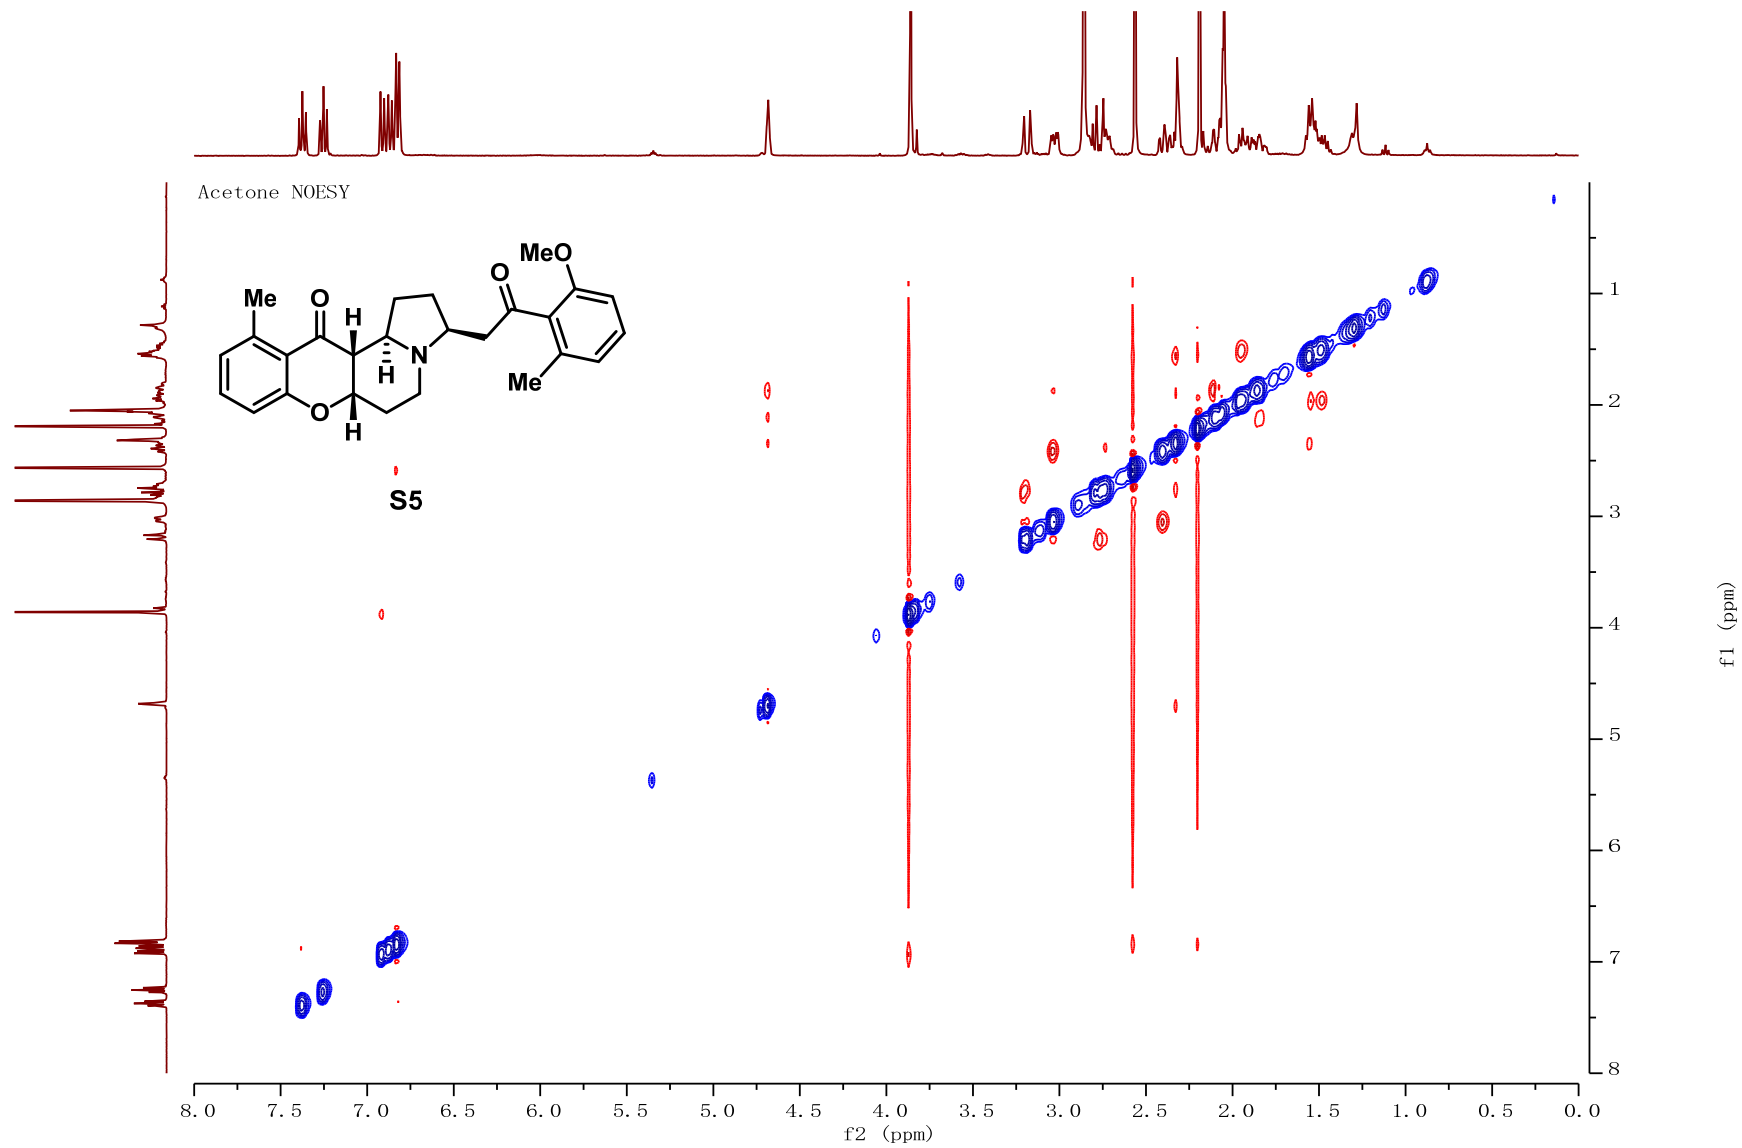

Compound 7 <sup>1</sup>H NMR (500 MHz, Acetone-d<sub>6</sub>)

7.37  
7.12  
6.87  
6.85  
6.83  
6.81  
6.78  
6.76  
6.72  
6.70

4.69

3.31  
3.30  
3.27  
3.26  
3.06  
3.05  
3.03  
3.02  
2.94  
2.92  
2.90  
2.88  
2.81  
2.56  
2.43  
2.36  
2.36  
2.35  
2.24  
2.09  
1.95  
1.85  
1.56

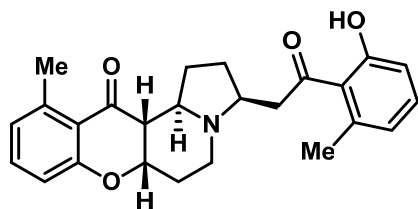

(±)-elaecarfoline B (7)

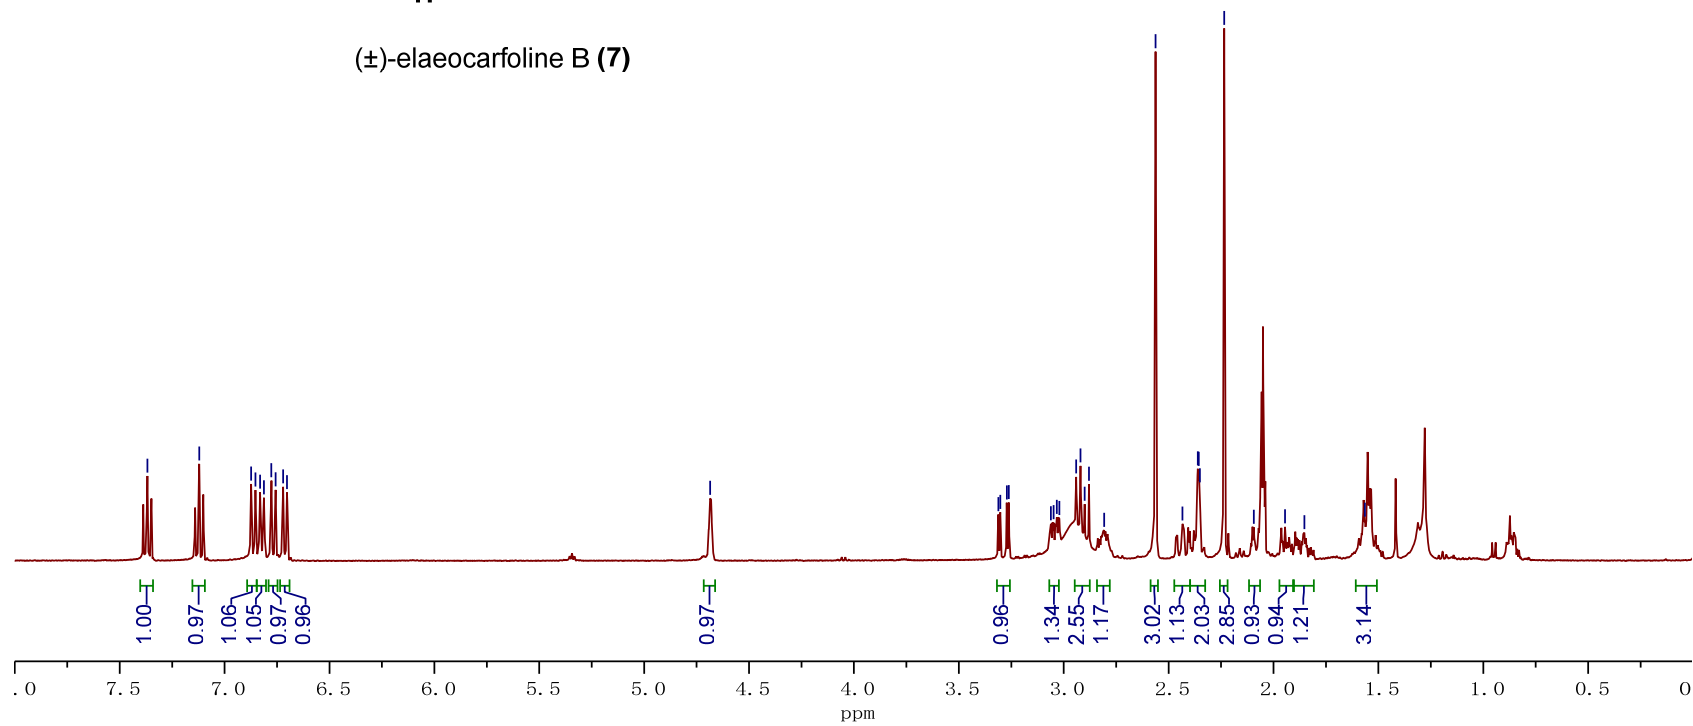

Compound 7 <sup>13</sup>C NMR (126 MHz, Acetone-*d*<sub>6</sub>)

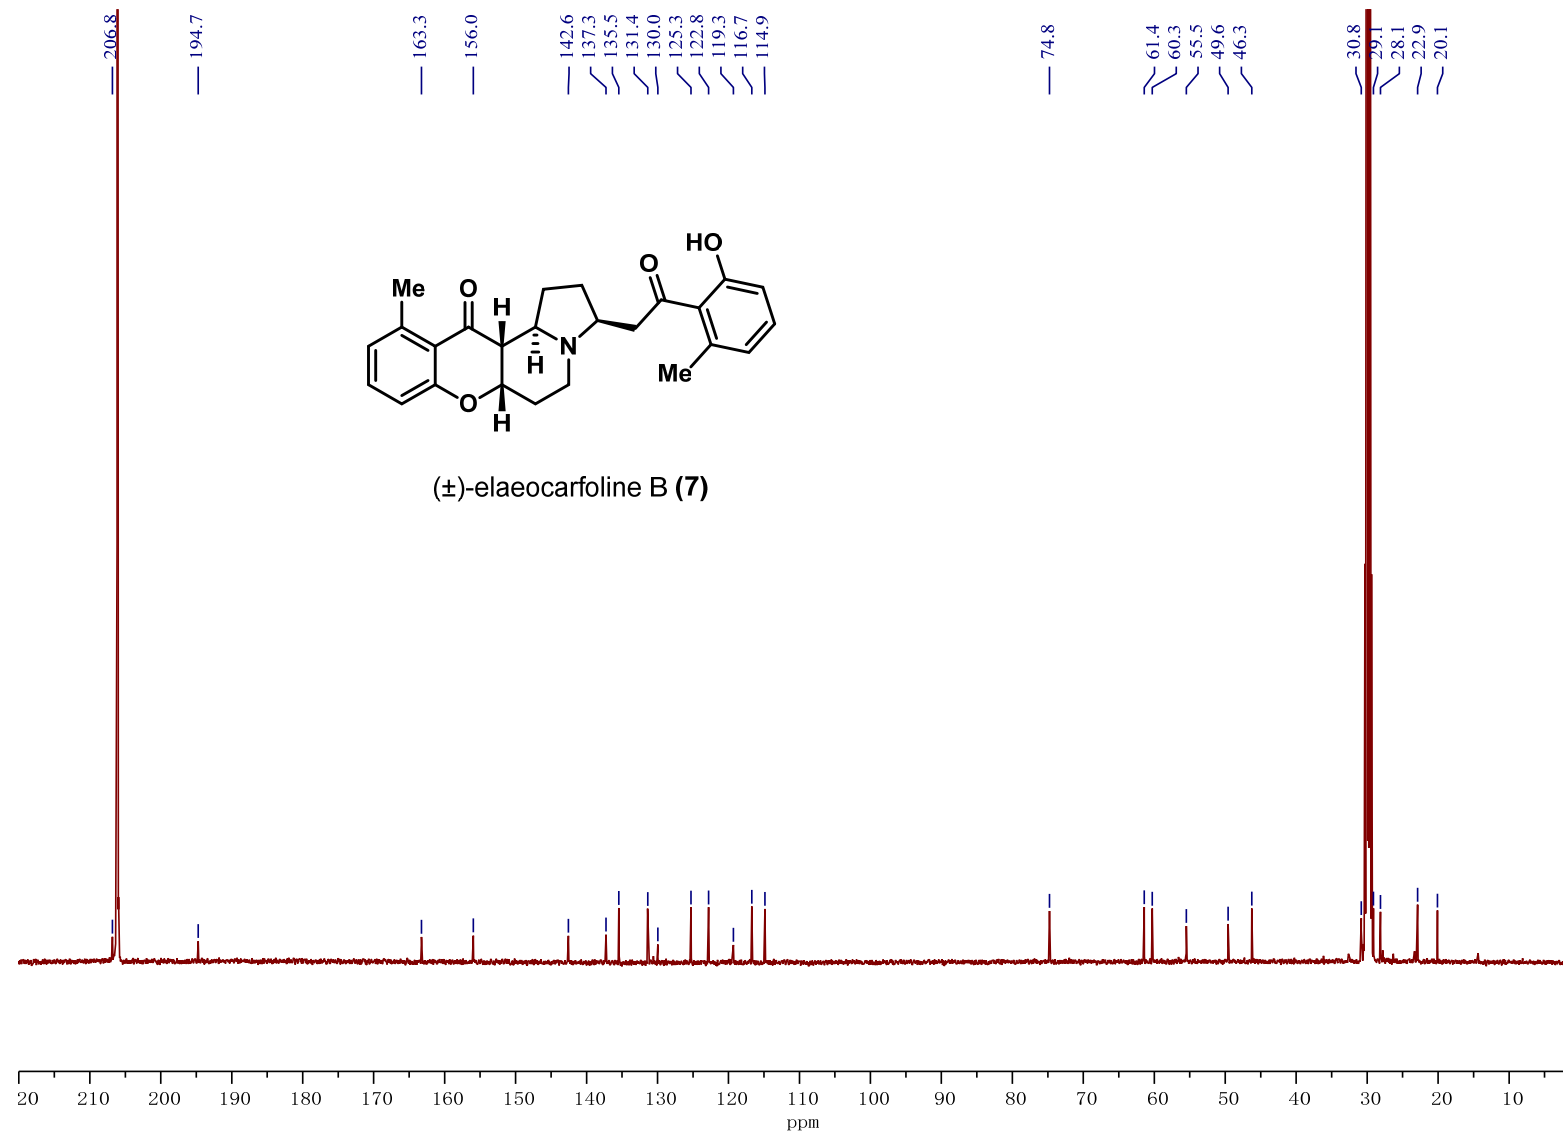

Supplement: d2qo01460b1.pdf [file d2qo01460b1.pdf]
